# Supplementary material for: Human induced pluripotent stem cell culture on a non-coated dish using medium supplemented with milk fat globule epidermal growth factor 8
Source: Research Square preprint supplement (doi:10.21203/rs.3.rs-2811612/v1), 2023-04-24
Supplement: Supplementary file 1 [file 541a02f49d0307961bd78099.xlsx]

## Sheet: TRANSPATH Pathways (2022.1)
ID	Title	Number of hits	Group size	Expected hits	P-value	Adjusted P-value	Hits	Hit names
CH000003595	glycolysis	13	31	3.60499	1.5679e-05	0.0123393	["ENSG00000067057","ENSG00000067225","ENSG00000079739","ENSG00000085662","ENSG00000105220","ENSG00000111640","ENSG00000111669","ENSG00000111674","ENSG00000141959","ENSG00000149925","ENSG00000156515","ENSG00000171314","ENSG00000178802"]	["AKR1B1","ALDOA","ENO2","GAPDH","GPI (ENSG00000105220)","HK1","MPI","PFKL","PFKP","PGAM1","PGM1","PKM","TPI1"]
CH000003563	glucose ---> pyruvate	10	24	2.79096	0.000168297	0.0662247	["ENSG00000067057","ENSG00000067225","ENSG00000105220","ENSG00000111640","ENSG00000111669","ENSG00000111674","ENSG00000141959","ENSG00000149925","ENSG00000156515","ENSG00000171314"]	["ALDOA","ENO2","GAPDH","GPI (ENSG00000105220)","HK1","PFKL","PFKP","PGAM1","PKM","TPI1"]
CH000000873	MEK ---> ABP-280	6	12	1.39548	0.00117317	0.307763	["ENSG00000071242","ENSG00000102882","ENSG00000117676","ENSG00000126934","ENSG00000137764","ENSG00000196924"]	["FLNA","MAP2K2","MAP2K5","MAPK3","RPS6KA1 (ENSG00000117676)","RPS6KA2"]
CH000003760	IMP ---> GTP	5	10	1.1629	0.0031443	0.618641	["ENSG00000103024","ENSG00000103202","ENSG00000106348","ENSG00000143774","ENSG00000178035"]	["GUK1","IMPDH1","IMPDH2","NME3","NME4"]
CH000000768	APP pathway	8	25	2.90725	0.00550347	0.631859	["ENSG00000105568","ENSG00000112640","ENSG00000117362","ENSG00000127445","ENSG00000143801","ENSG00000166313","ENSG00000167393","ENSG00000205155"]	["APBB1","APH1A","PIN1","PPP2R1A","PPP2R3B (ENSG00000167393)","PPP2R5D","PSEN2","PSENEN"]
CH000000143	AT1A ---> alpha-actin	3	4	0.46516	0.00568619	0.631859	["ENSG00000050820","ENSG00000081760","ENSG00000143632"]	["AACS","ACTA1","BCAR1 (ENSG00000050820)"]
CH000004690	LXR ---/ IL1B	3	4	0.46516	0.00568619	0.631859	["ENSG00000131408","ENSG00000173039","ENSG00000196498"]	["NCOR2","NR1H2","RELA"]
CH000003615	glucose ---> GDP-4-dehydro-6-deoxy-D-mannose	4	8	0.93032	0.00854749	0.631859	["ENSG00000105220","ENSG00000112699","ENSG00000156515","ENSG00000178802"]	["GMDS","GPI (ENSG00000105220)","HK1","MPI"]
CH000003617	mannose and deoxy hexoses	4	8	0.93032	0.00854749	0.631859	["ENSG00000105220","ENSG00000112699","ENSG00000156515","ENSG00000178802"]	["GMDS","GPI (ENSG00000105220)","HK1","MPI"]
CH000003780	acidic hexose derivatives and inositol	6	18	2.09322	0.012878	0.631859	["ENSG00000079739","ENSG00000117448","ENSG00000130313","ENSG00000141401","ENSG00000156515","ENSG00000160211"]	["AKR1A1","G6PD","HK1","IMPA2","PGLS","PGM1"]
CH000000986	p53 ---> cytochrome C	3	5	0.58145	0.0129962	0.631859	["ENSG00000030110","ENSG00000141510","ENSG00000171552"]	["BAK1","BCL2L1","TP53"]
CH000000225	MKK3 ---p38gamma---> Elk-1	2	2	0.23258	0.013475	0.631859	["ENSG00000034152","ENSG00000126767"]	["ELK1","MAP2K3"]
CH000003774	glucose-6-p ---> 6-phospho-D-gluconate	2	2	0.23258	0.013475	0.631859	["ENSG00000130313","ENSG00000160211"]	["G6PD","PGLS"]
CH000004389	NICD1 ---> Hes1; Hey1	2	2	0.23258	0.013475	0.631859	["ENSG00000020256","ENSG00000148400"]	["NOTCH1","ZFP64"]
CH000004410	NICD1 ---zfp64---/ MYOD1	2	2	0.23258	0.013475	0.631859	["ENSG00000020256","ENSG00000148400"]	["NOTCH1","ZFP64"]
CH000000550	gamma-secretase ---> Fe65	4	9	1.04661	0.0139971	0.631859	["ENSG00000117362","ENSG00000143801","ENSG00000166313","ENSG00000205155"]	["APBB1","APH1A","PSEN2","PSENEN"]
CH000001019	Shh ---> internalization of Smo	4	9	1.04661	0.0139971	0.631859	["ENSG00000128602","ENSG00000141480","ENSG00000173020","ENSG00000175416"]	["ARRB2","CLTB","GRK2","SMO"]
CH000004706	FA network	8	29	3.37241	0.0144517	0.631859	["ENSG00000012061","ENSG00000112039","ENSG00000130985","ENSG00000162585","ENSG00000185504","ENSG00000187741","ENSG00000188827","ENSG00000221829"]	["ERCC1","FAAP100","FAAP20","FANCA","FANCE","FANCG","SLX4","UBA1"]
CH000004717	FA core complex formation	5	14	1.62806	0.0168727	0.645252	["ENSG00000112039","ENSG00000162585","ENSG00000185504","ENSG00000187741","ENSG00000221829"]	["FAAP100","FAAP20","FANCA","FANCE","FANCG"]
CH000004216	creatine biosynthesis and degradation	6	19	2.20951	0.017033	0.645252	["ENSG00000101444","ENSG00000130005","ENSG00000166165","ENSG00000176974","ENSG00000182199","ENSG00000223572"]	["AHCY","CKB","CKMT1A","GAMT","SHMT1 (ENSG00000176974)","SHMT2"]
CH000000598	APP processing and nuclear translocation	4	10	1.1629	0.0212322	0.645252	["ENSG00000117362","ENSG00000143801","ENSG00000166313","ENSG00000205155"]	["APBB1","APH1A","PSEN2","PSENEN"]
CH000000792	CXCR1 internalization via clathrin-coated pits	4	10	1.1629	0.0212322	0.645252	["ENSG00000106976","ENSG00000141480","ENSG00000173020","ENSG00000175416"]	["ARRB2","CLTB","DNM1","GRK2"]
CH000004716	ID complex ubiquitination	6	20	2.3258	0.0220263	0.645252	["ENSG00000112039","ENSG00000130985","ENSG00000162585","ENSG00000185504","ENSG00000187741","ENSG00000221829"]	["FAAP100","FAAP20","FANCA","FANCE","FANCG","UBA1"]
CH000000726	Eps15 ---> ErbB internalization	5	15	1.74435	0.0229631	0.645252	["ENSG00000042753","ENSG00000079805","ENSG00000106976","ENSG00000175416","ENSG00000196961"]	["AP2A1","AP2S1","CLTB","DNM1","DNM2"]
CH000004321	alkyl-DHAP ---> alkylacylglycerol	5	15	1.74435	0.0229631	0.645252	["ENSG00000067113","ENSG00000129951","ENSG00000141934","ENSG00000169692","ENSG00000204310"]	["AGPAT1 (ENSG00000204310)","AGPAT2","PLPP1","PLPP2","PLPPR3 (ENSG00000129951)"]
CH000004432	sn-glycerol 3-phosphate ---> lysophosphotidylserine	5	15	1.74435	0.0229631	0.645252	["ENSG00000067113","ENSG00000129951","ENSG00000141934","ENSG00000169692","ENSG00000204310"]	["AGPAT1 (ENSG00000204310)","AGPAT2","PLPP1","PLPP2","PLPPR3 (ENSG00000129951)"]
CH000000539	gamma-secretase processing	3	6	0.69774	0.0237767	0.645252	["ENSG00000117362","ENSG00000143801","ENSG00000205155"]	["APH1A","PSEN2","PSENEN"]
CH000003670	3-phospho-D-glycerate ---> glycine, 5,10-methylene-THF	3	6	0.69774	0.0237767	0.645252	["ENSG00000092621","ENSG00000176974","ENSG00000182199"]	["PHGDH","SHMT1 (ENSG00000176974)","SHMT2"]
CH000004692	LXR network	3	6	0.69774	0.0237767	0.645252	["ENSG00000131408","ENSG00000173039","ENSG00000196498"]	["NCOR2","NR1H2","RELA"]
CH000003566	citrate cycle	6	21	2.44209	0.0279214	0.681195	["ENSG00000067829","ENSG00000073578","ENSG00000100412","ENSG00000105953","ENSG00000119689","ENSG00000146701"]	["ACO2","DLST","IDH3G","MDH2","OGDH","SDHA"]
CH000003571	pyruvate ---> D-glucose	6	21	2.44209	0.0279214	0.681195	["ENSG00000100889","ENSG00000105220","ENSG00000111640","ENSG00000111674","ENSG00000149925","ENSG00000171314"]	["ALDOA","ENO2","GAPDH","GPI (ENSG00000105220)","PCK2 (ENSG00000100889)","PGAM1"]
CH000004587	WAVE2 ---> Arp2/3 complex	6	21	2.44209	0.0279214	0.681195	["ENSG00000055163","ENSG00000075624","ENSG00000081760","ENSG00000143632","ENSG00000175866","ENSG00000241553"]	["AACS","ACTA1","ACTB","ARPC4","BAIAP2","CYFIP2"]
CH000000750	Insulin pathway	16	84	9.76836	0.0289083	0.681195	["ENSG00000002330","ENSG00000067606","ENSG00000071242","ENSG00000078061","ENSG00000102882","ENSG00000103197","ENSG00000104812","ENSG00000105723","ENSG00000111319","ENSG00000117676","ENSG00000126934","ENSG00000137312","ENSG00000137764","ENSG00000172531","ENSG00000184557","ENSG00000187840"]	["ARAF","BAD","EIF4EBP1","FLOT1 (ENSG00000137312)","GSK3A","GYS1","MAP2K2","MAP2K5","MAPK3","PPP1CA","PRKCZ","RPS6KA1 (ENSG00000117676)","RPS6KA2","SCNN1A","SOCS3","TSC2"]
CH000003716	lysine metabolism	4	11	1.27919	0.0303801	0.681195	["ENSG00000083444","ENSG00000105607","ENSG00000105953","ENSG00000119689"]	["DLST","GCDH","OGDH","PLOD1"]
CH000003876	Pin1 ---> Tau	4	11	1.27919	0.0303801	0.681195	["ENSG00000105568","ENSG00000112640","ENSG00000127445","ENSG00000167393"]	["PIN1","PPP2R1A","PPP2R3B (ENSG00000167393)","PPP2R5D"]
CH000000722	EGF pathway	22	127	14.7688	0.03205	0.681195	["ENSG00000042753","ENSG00000071242","ENSG00000075624","ENSG00000079805","ENSG00000081760","ENSG00000096433","ENSG00000102882","ENSG00000105568","ENSG00000106976","ENSG00000112640","ENSG00000115325","ENSG00000117676","ENSG00000126934","ENSG00000136854","ENSG00000137764","ENSG00000143632","ENSG00000175416","ENSG00000196924","ENSG00000196961","ENSG00000197122","ENSG00000204435","ENSG00000241553"]	["AACS","ACTA1","ACTB","AP2A1","AP2S1","ARPC4","CLTB","CSNK2B (ENSG00000204435)","DNM1","DNM2","DOK1","FLNA","ITPR3","MAP2K2","MAP2K5","MAPK3","PPP2R1A","PPP2R5D","RPS6KA1 (ENSG00000117676)","RPS6KA2","SRC","STXBP1"]
CH000000802	G-alpha-q ---> arachidonic acid, ERK	7	28	3.25612	0.0365044	0.681195	["ENSG00000069966","ENSG00000096433","ENSG00000102882","ENSG00000126934","ENSG00000137764","ENSG00000163932","ENSG00000172354"]	["GNB2","GNB5","ITPR3","MAP2K2","MAP2K5","MAPK3","PRKCD"]
CH000000475	MLK3, DLK ---> c-Jun	2	3	0.34887	0.0373133	0.681195	["ENSG00000076984","ENSG00000173327"]	["MAP2K7","MAP3K11"]
CH000000976	Plk3 ---> p53	2	3	0.34887	0.0373133	0.681195	["ENSG00000141510","ENSG00000166851"]	["PLK1","TP53"]
CH000003638	glucose-6-p ---> D-ribulose 5-phosphate	2	3	0.34887	0.0373133	0.681195	["ENSG00000130313","ENSG00000160211"]	["G6PD","PGLS"]
CH000003877	Pin1 ---> p50:RelA-p65	2	3	0.34887	0.0373133	0.681195	["ENSG00000127445","ENSG00000173039"]	["PIN1","RELA"]
CH000000836	JIP-1 ---> APP	3	7	0.81403	0.0380846	0.681195	["ENSG00000076984","ENSG00000121653","ENSG00000173327"]	["MAP2K7","MAP3K11","MAPK8IP1"]
CH000003607	glycine, L-arginine ---> creatinine	3	7	0.81403	0.0380846	0.681195	["ENSG00000130005","ENSG00000166165","ENSG00000223572"]	["CKB","CKMT1A","GAMT"]
CH000003712	lysine ---> crotonylcoA	3	7	0.81403	0.0380846	0.681195	["ENSG00000105607","ENSG00000105953","ENSG00000119689"]	["DLST","GCDH","OGDH"]
CH000004459	phosphatidylcholine ---> DAG	4	12	1.39548	0.0415118	0.710214	["ENSG00000067113","ENSG00000105223","ENSG00000129951","ENSG00000141934"]	["PLD3","PLPP1","PLPP2","PLPPR3 (ENSG00000129951)"]
CH000004593	N-cadherin network	4	12	1.39548	0.0415118	0.710214	["ENSG00000075624","ENSG00000081760","ENSG00000143632","ENSG00000173801"]	["AACS","ACTA1","ACTB","JUP"]
CH000004320	biosynthesis of membrane phospholipids from alkyl-DHAP	5	18	2.09322	0.0490365	0.732162	["ENSG00000067113","ENSG00000129951","ENSG00000141934","ENSG00000169692","ENSG00000204310"]	["AGPAT1 (ENSG00000204310)","AGPAT2","PLPP1","PLPP2","PLPPR3 (ENSG00000129951)"]
CH000001022	Sonic Hedgehog pathway	4	13	1.51177	0.0546465	0.732162	["ENSG00000128602","ENSG00000141480","ENSG00000173020","ENSG00000175416"]	["ARRB2","CLTB","GRK2","SMO"]
CH000003652	pentose phosphate pathway	4	13	1.51177	0.0546465	0.732162	["ENSG00000105220","ENSG00000130313","ENSG00000160211","ENSG00000163931"]	["G6PD","GPI (ENSG00000105220)","PGLS","TKT"]
CH000003673	serine metabolism	4	13	1.51177	0.0546465	0.732162	["ENSG00000092621","ENSG00000171314","ENSG00000176974","ENSG00000182199"]	["PGAM1","PHGDH","SHMT1 (ENSG00000176974)","SHMT2"]
CH000000927	non-amyloidogenic APP pathway	3	8	0.93032	0.0558068	0.732162	["ENSG00000117362","ENSG00000143801","ENSG00000205155"]	["APH1A","PSEN2","PSENEN"]
CH000000953	CHIP ---/ Pael-R	3	8	0.93032	0.0558068	0.732162	["ENSG00000103266","ENSG00000130985","ENSG00000204389"]	["HSPA1A (ENSG00000204389)","STUB1","UBA1"]
CH000003614	fructose-6-phosphate ---> glyceraldehyde-3-phosphate	3	8	0.93032	0.0558068	0.732162	["ENSG00000067057","ENSG00000141959","ENSG00000149925"]	["ALDOA","PFKL","PFKP"]
CH000003934	non-amyloidogenic epsilon cleavage	3	8	0.93032	0.0558068	0.732162	["ENSG00000117362","ENSG00000143801","ENSG00000205155"]	["APH1A","PSEN2","PSENEN"]
CH000004652	AT1A ---beta-arrestin2---> bad	3	8	0.93032	0.0558068	0.732162	["ENSG00000002330","ENSG00000117676","ENSG00000141480"]	["ARRB2","BAD","RPS6KA1 (ENSG00000117676)"]
CH000003912	neurotrophic signaling	16	92	10.6987	0.0607005	0.732162	["ENSG00000030110","ENSG00000069966","ENSG00000078295","ENSG00000102882","ENSG00000117362","ENSG00000126767","ENSG00000130985","ENSG00000137764","ENSG00000141510","ENSG00000143801","ENSG00000148334","ENSG00000163932","ENSG00000171552","ENSG00000172354","ENSG00000173039","ENSG00000205155"]	["ADCY2","APH1A","BAK1","BCL2L1","ELK1","GNB2","GNB5","MAP2K5","MAPK3","PRKCD","PSEN2","PSENEN","PTGES2","RELA","TP53","UBA1"]
CH000003573	glycerol ---> triacylglycerol	6	25	2.90725	0.0614285	0.732162	["ENSG00000067113","ENSG00000129951","ENSG00000141934","ENSG00000169692","ENSG00000185000","ENSG00000204310"]	["AGPAT1 (ENSG00000204310)","AGPAT2","DGAT1 (ENSG00000185000)","PLPP1","PLPP2","PLPPR3 (ENSG00000129951)"]
CH000003667	citrate cycle	6	25	2.90725	0.0614285	0.732162	["ENSG00000067829","ENSG00000073578","ENSG00000100412","ENSG00000105953","ENSG00000119689","ENSG00000146701"]	["ACO2","DLST","IDH3G","MDH2","OGDH","SDHA"]
CH000004431	kennedy pathway	6	25	2.90725	0.0614285	0.732162	["ENSG00000067113","ENSG00000129951","ENSG00000141934","ENSG00000169692","ENSG00000174915","ENSG00000204310"]	["AGPAT1 (ENSG00000204310)","AGPAT2","PLPP1","PLPP2","PLPPR3 (ENSG00000129951)","PTDSS2 (ENSG00000174915)"]
CH000004590	tubulin ---restin, IQGAP1---> actin	6	25	2.90725	0.0614285	0.732162	["ENSG00000075624","ENSG00000081760","ENSG00000127824","ENSG00000131462","ENSG00000143632","ENSG00000196230"]	["AACS","ACTA1","ACTB","TUBA4A","TUBB (ENSG00000196230)","TUBG1"]
CH000000218	MKK3 ---> Elk-1	2	4	0.46516	0.0689405	0.732162	["ENSG00000034152","ENSG00000126767"]	["ELK1","MAP2K3"]
CH000000495	Tiam1 ---> p38alpha	2	4	0.46516	0.0689405	0.732162	["ENSG00000034152","ENSG00000173327"]	["MAP2K3","MAP3K11"]
CH000000575	MKK3 ---/ tuberin	2	4	0.46516	0.0689405	0.732162	["ENSG00000034152","ENSG00000103197"]	["MAP2K3","TSC2"]
CH000000798	PKC ---> ERK1, ERK2	2	4	0.46516	0.0689405	0.732162	["ENSG00000078061","ENSG00000126934"]	["ARAF","MAP2K2"]
CH000000799	PKCdelta ---> GRK2	2	4	0.46516	0.0689405	0.732162	["ENSG00000163932","ENSG00000173020"]	["GRK2","PRKCD"]
CH000003593	mannose ---> fructose-6-phosphate	2	4	0.46516	0.0689405	0.732162	["ENSG00000156515","ENSG00000178802"]	["HK1","MPI"]
CH000003613	beta-D-fructose-6-phosphate ---> D-mannose	2	4	0.46516	0.0689405	0.732162	["ENSG00000156515","ENSG00000178802"]	["HK1","MPI"]
CH000004424	GABA ---> succinate	2	4	0.46516	0.0689405	0.732162	["ENSG00000053371","ENSG00000117448"]	["AKR1A1","AKR7A2"]
CH000000923	p53 transcription complex	3	9	1.04661	0.0767117	0.732162	["ENSG00000099956","ENSG00000141510","ENSG00000204435"]	["CSNK2B (ENSG00000204435)","SMARCB1 (ENSG00000099956)","TP53"]
CH000003601	folate ---5-methyl-THF ---> tetrahydrofolylpolyglutamate	3	9	1.04661	0.0767117	0.732162	["ENSG00000136877","ENSG00000176974","ENSG00000182199"]	["FPGS","SHMT1 (ENSG00000176974)","SHMT2"]
CH000003648	inositol, CDP-1,2-diacylglycerol ---> triacylglycerol	3	9	1.04661	0.0767117	0.732162	["ENSG00000067113","ENSG00000129951","ENSG00000141934"]	["PLPP1","PLPP2","PLPPR3 (ENSG00000129951)"]
CH000003697	2'-deoxycytidine-5'-phosphate ---> 2'-deoxyuridine 5'-phosphate	3	9	1.04661	0.0767117	0.732162	["ENSG00000103024","ENSG00000103202","ENSG00000129187"]	["DCTD","NME3","NME4"]
CH000004243	estradiol ---> ER-alpha (NR3A1)	3	9	1.04661	0.0767117	0.732162	["ENSG00000126803","ENSG00000204388","ENSG00000204389"]	["HSPA1A (ENSG00000204389)","HSPA1B (ENSG00000204388)","HSPA2"]
CH000004595	E-cadherin ---Eplin---> actin	3	9	1.04661	0.0767117	0.732162	["ENSG00000075624","ENSG00000081760","ENSG00000143632"]	["AACS","ACTA1","ACTB"]
CH000000656	Insulin ---Shc---> MAPK cascade	6	27	3.13983	0.0844529	0.732162	["ENSG00000071242","ENSG00000078061","ENSG00000102882","ENSG00000117676","ENSG00000126934","ENSG00000137764"]	["ARAF","MAP2K2","MAP2K5","MAPK3","RPS6KA1 (ENSG00000117676)","RPS6KA2"]
CH000004577	Rac1 ---p65PAK---> Arp2/3 complex	4	15	1.74435	0.0867716	0.732162	["ENSG00000075624","ENSG00000081760","ENSG00000143632","ENSG00000241553"]	["AACS","ACTA1","ACTB","ARPC4"]
CH000000937	PRL ---Src,FAK1---> ERK	5	21	2.44209	0.0874542	0.732162	["ENSG00000078061","ENSG00000102882","ENSG00000126934","ENSG00000137764","ENSG00000197122"]	["ARAF","MAP2K2","MAP2K5","MAPK3","SRC"]
CH000003636	urea and aspartate cycles, polyamine and creatine synthesis	5	21	2.44209	0.0874542	0.732162	["ENSG00000116649","ENSG00000130005","ENSG00000146701","ENSG00000166165","ENSG00000223572"]	["CKB","CKMT1A","GAMT","MDH2","SRM"]
CH000000752	Rac1 pathway	12	68	7.90772	0.0885253	0.732162	["ENSG00000055163","ENSG00000075624","ENSG00000081760","ENSG00000106683","ENSG00000126767","ENSG00000127824","ENSG00000131462","ENSG00000143632","ENSG00000173327","ENSG00000175866","ENSG00000196230","ENSG00000241553"]	["AACS","ACTA1","ACTB","ARPC4","BAIAP2","CYFIP2","ELK1","LIMK1","MAP3K11","TUBA4A","TUBB (ENSG00000196230)","TUBG1"]
CH000000794	neurotensin pathway	8	41	4.76789	0.0949727	0.732162	["ENSG00000069966","ENSG00000096433","ENSG00000102882","ENSG00000126934","ENSG00000137764","ENSG00000163932","ENSG00000172354","ENSG00000173020"]	["GNB2","GNB5","GRK2","ITPR3","MAP2K2","MAP2K5","MAPK3","PRKCD"]
CH000003770	interconversions and degradations of purine ribonucleotides	8	41	4.76789	0.0949727	0.732162	["ENSG00000103024","ENSG00000103202","ENSG00000106348","ENSG00000116337","ENSG00000143774","ENSG00000178035","ENSG00000197586","ENSG00000198931"]	["AMPD2","APRT","ENTPD6","GUK1","IMPDH1","IMPDH2","NME3","NME4"]
CH000000257	PP2A ---> CXCR2:PR65	3	10	1.1629	0.100489	0.732162	["ENSG00000105568","ENSG00000112640","ENSG00000167393"]	["PPP2R1A","PPP2R3B (ENSG00000167393)","PPP2R5D"]
CH000003737	glycine ---> hemoglobin	3	10	1.1629	0.100489	0.732162	["ENSG00000023330","ENSG00000066926","ENSG00000256269"]	["ALAS1","FECH","HMBS"]
CH000003745	biosynthesis of hemoglobin and cytochromes	3	10	1.1629	0.100489	0.732162	["ENSG00000023330","ENSG00000066926","ENSG00000256269"]	["ALAS1","FECH","HMBS"]
CH000003771	D-glucose ---> L-ascorbate	3	10	1.1629	0.100489	0.732162	["ENSG00000117448","ENSG00000141401","ENSG00000156515"]	["AKR1A1","HK1","IMPA2"]
CH000003793	fructose metabolism	3	10	1.1629	0.100489	0.732162	["ENSG00000067057","ENSG00000141959","ENSG00000149925"]	["ALDOA","PFKL","PFKP"]
CH000004687	ErbB4, ligand-depending processing	3	10	1.1629	0.100489	0.732162	["ENSG00000117362","ENSG00000143801","ENSG00000205155"]	["APH1A","PSEN2","PSENEN"]
CH000004688	ErbB4-JM-A CYT1 ---> YAP	3	10	1.1629	0.100489	0.732162	["ENSG00000117362","ENSG00000143801","ENSG00000205155"]	["APH1A","PSEN2","PSENEN"]
CH000000666	alpha IIb beta3 ---> Rac1	5	22	2.55838	0.102949	0.732162	["ENSG00000103653","ENSG00000125753","ENSG00000137076","ENSG00000185043","ENSG00000197122"]	["CIB1","CSK","SRC","TLN1","VASP"]
CH000000748	alpha IIb beta3 pathway 12	5	22	2.55838	0.102949	0.732162	["ENSG00000103653","ENSG00000125753","ENSG00000137076","ENSG00000185043","ENSG00000197122"]	["CIB1","CSK","SRC","TLN1","VASP"]
CH000000601	Delta ---Notch1---> NICD1	4	16	1.86064	0.10559	0.732162	["ENSG00000117362","ENSG00000143801","ENSG00000148400","ENSG00000205155"]	["APH1A","NOTCH1","PSEN2","PSENEN"]
CH000000659	VEGF-A ---> PLA2	4	16	1.86064	0.10559	0.732162	["ENSG00000102882","ENSG00000126934","ENSG00000137764","ENSG00000163932"]	["MAP2K2","MAP2K5","MAPK3","PRKCD"]
CH000000904	Jagged1 ---Notch1---> NICD1	4	16	1.86064	0.10559	0.732162	["ENSG00000117362","ENSG00000143801","ENSG00000148400","ENSG00000205155"]	["APH1A","NOTCH1","PSEN2","PSENEN"]
CH000000293	CKII-alpha2:CKII-beta:SUPT16H:SSRP1 ---> p53	2	5	0.58145	0.106237	0.732162	["ENSG00000141510","ENSG00000204435"]	["CSNK2B (ENSG00000204435)","TP53"]
CH000000321	CKII ---> RelA-p65	2	5	0.58145	0.106237	0.732162	["ENSG00000173039","ENSG00000204435"]	["CSNK2B (ENSG00000204435)","RELA"]
CH000000778	Csk, CD45 ---> Lck	2	5	0.58145	0.106237	0.732162	["ENSG00000103653","ENSG00000182866"]	["CSK","LCK"]
CH000000812	DLK ---> c-Jun	2	5	0.58145	0.106237	0.732162	["ENSG00000076984","ENSG00000121653"]	["MAP2K7","MAPK8IP1"]
CH000000834	JNK1 ---> Bax	2	5	0.58145	0.106237	0.732162	["ENSG00000030110","ENSG00000087088"]	["BAK1","BAX"]
CH000000907	Cdk1, Plk1 ---/ cyclin B	2	5	0.58145	0.106237	0.732162	["ENSG00000117399","ENSG00000166851"]	["CDC20","PLK1"]
CH000003598	glutamate conversions	2	5	0.58145	0.106237	0.732162	["ENSG00000159423","ENSG00000183010"]	["ALDH4A1","PYCR1"]
CH000003630	sorbitol ---> glucose,fructose-6-phosphate	2	5	0.58145	0.106237	0.732162	["ENSG00000085662","ENSG00000156515"]	["AKR1B1","HK1"]
CH000003679	L-serine, THF ---> tetrahydrofolylpolyglutamate	2	5	0.58145	0.106237	0.732162	["ENSG00000176974","ENSG00000182199"]	["SHMT1 (ENSG00000176974)","SHMT2"]
CH000003680	glycine metabolism	2	5	0.58145	0.106237	0.732162	["ENSG00000176974","ENSG00000182199"]	["SHMT1 (ENSG00000176974)","SHMT2"]
CH000003714	tyrosine ---> fumarate	2	5	0.58145	0.106237	0.732162	["ENSG00000100577","ENSG00000103876"]	["FAH","GSTZ1"]
CH000004217	glycine, L-arginine ---creatine---> creatinine	2	5	0.58145	0.106237	0.732162	["ENSG00000101444","ENSG00000130005"]	["AHCY","GAMT"]
CH000004218	creatine, phosphocreatinine ---> creatinine	2	5	0.58145	0.106237	0.732162	["ENSG00000166165","ENSG00000223572"]	["CKB","CKMT1A"]
CH000004226	L-serine, THF ---> S-adenosylmethionine	2	5	0.58145	0.106237	0.732162	["ENSG00000176974","ENSG00000182199"]	["SHMT1 (ENSG00000176974)","SHMT2"]
CH000004423	catabolism of GABA	2	5	0.58145	0.106237	0.732162	["ENSG00000053371","ENSG00000117448"]	["AKR1A1","AKR7A2"]
CH000004571	sestrin2 ---AMPKalpha---> tuberin	2	5	0.58145	0.106237	0.732162	["ENSG00000103197","ENSG00000130766"]	["SESN2 (ENSG00000130766)","TSC2"]
CH000004656	ERK1 ---> NQO1	2	5	0.58145	0.106237	0.732162	["ENSG00000102882","ENSG00000198517"]	["MAFK","MAPK3"]
CH000000786	IL_8 pathway	9	49	5.69821	0.107302	0.732162	["ENSG00000069966","ENSG00000096433","ENSG00000105223","ENSG00000106976","ENSG00000141480","ENSG00000172354","ENSG00000173020","ENSG00000175416","ENSG00000196961"]	["AP2A1","ARRB2","CLTB","DNM1","GNB2","GNB5","GRK2","ITPR3","PLD3"]
CH000000006	fMLP ---> ERK1	1	1	0.11629	0.11629	0.732162	["ENSG00000126934"]	["MAP2K2"]
CH000000007	fMLP ---> ERK2	1	1	0.11629	0.11629	0.732162	["ENSG00000126934"]	["MAP2K2"]
CH000000099	Jak1 ---> SOCS-3	1	1	0.11629	0.11629	0.732162	["ENSG00000184557"]	["SOCS3"]
CH000000118	Syk ---> Lck	1	1	0.11629	0.11629	0.732162	["ENSG00000182866"]	["LCK"]
CH000000226	MKK3 ---p38gamma---> MBP	1	1	0.11629	0.11629	0.732162	["ENSG00000034152"]	["MAP2K3"]
CH000000248	hipk2 ---> p53{pS46}	1	1	0.11629	0.11629	0.732162	["ENSG00000141510"]	["TP53"]
CH000000357	FGFR-3 ---> SH2-B-beta	1	1	0.11629	0.11629	0.732162	["ENSG00000068078"]	["FGFR3"]
CH000000460	JIP-1 ---> NF-ATc	1	1	0.11629	0.11629	0.732162	["ENSG00000121653"]	["MAPK8IP1"]
CH000000525	PKC ---> Ca:dynamin-1{p}	1	1	0.11629	0.11629	0.732162	["ENSG00000106976"]	["DNM1"]
CH000003649	glucose-6-p isomerisation	1	1	0.11629	0.11629	0.732162	["ENSG00000105220"]	["GPI (ENSG00000105220)"]
CH000003802	D-glucuronate ---> L-ascorbate	1	1	0.11629	0.11629	0.732162	["ENSG00000117448"]	["AKR1A1"]
CH000003805	biosynthesis and degradation of ascorbate	1	1	0.11629	0.11629	0.732162	["ENSG00000117448"]	["AKR1A1"]
CH000003845	PGH2 ---> 6-ketoprostaglandin F2-alpha	1	1	0.11629	0.11629	0.732162	["ENSG00000124212"]	["PTGIS"]
CH000003847	arachidonic acid ---> 5,6-DHET	1	1	0.11629	0.11629	0.732162	["ENSG00000143819"]	["EPHX1"]
CH000003628	gluconeogenesis	8	43	5.00047	0.117984	0.73693	["ENSG00000092621","ENSG00000100889","ENSG00000105220","ENSG00000111640","ENSG00000111669","ENSG00000111674","ENSG00000149925","ENSG00000171314"]	["ALDOA","ENO2","GAPDH","GPI (ENSG00000105220)","PCK2 (ENSG00000100889)","PGAM1","PHGDH","TPI1"]
CH000000607	BCR ---> ERK	5	23	2.67467	0.119707	0.741804	["ENSG00000078061","ENSG00000102882","ENSG00000110651","ENSG00000126934","ENSG00000137764"]	["ARAF","CD81","MAP2K2","MAP2K5","MAPK3"]
CH000004675	EP2 ---> VEGFA	4	17	1.97693	0.126082	0.761644	["ENSG00000069966","ENSG00000078295","ENSG00000148334","ENSG00000172354"]	["ADCY2","GNB2","GNB5","PTGES2"]
CH000000791	CXCR2 internalization via clathrin-coated pits	3	11	1.27919	0.126779	0.761644	["ENSG00000106976","ENSG00000175416","ENSG00000196961"]	["AP2A1","CLTB","DNM1"]
CH000004594	N-cadherin ---Eplin---> actin	3	11	1.27919	0.126779	0.761644	["ENSG00000075624","ENSG00000081760","ENSG00000143632"]	["AACS","ACTA1","ACTB"]
CH000004689	ErbB4-JM-A CYT2 ---> YAP, WOX1	3	11	1.27919	0.126779	0.761644	["ENSG00000117362","ENSG00000143801","ENSG00000205155"]	["APH1A","PSEN2","PSENEN"]
CH000000586	ZAP-70 ---> Elk-1	5	24	2.79096	0.137656	0.782563	["ENSG00000078061","ENSG00000102882","ENSG00000126767","ENSG00000126934","ENSG00000137764"]	["ARAF","ELK1","MAP2K2","MAP2K5","MAPK3"]
CH000000039	IL-4 ---> STAT6	2	6	0.69774	0.147467	0.782563	["ENSG00000077238","ENSG00000166888"]	["IL4R","STAT6"]
CH000000333	Vav ---> NF-kappaB	2	6	0.69774	0.147467	0.782563	["ENSG00000104856","ENSG00000173039"]	["RELA","RELB"]
CH000000708	Caspase-3 ---/ p53	2	6	0.69774	0.147467	0.782563	["ENSG00000141510","ENSG00000163932"]	["PRKCD","TP53"]
CH000000766	IL-4 - STAT6 pathway	2	6	0.69774	0.147467	0.782563	["ENSG00000077238","ENSG00000166888"]	["IL4R","STAT6"]
CH000003562	Plk1 ---> INCENP	2	6	0.69774	0.147467	0.782563	["ENSG00000166851","ENSG00000178999"]	["AURKB","PLK1"]
CH000004453	MITF ---> TPH1	2	6	0.69774	0.147467	0.782563	["ENSG00000117676","ENSG00000131788"]	["PIAS3","RPS6KA1 (ENSG00000117676)"]
CH000004482	Bad ---> 14-3-3	2	6	0.69774	0.147467	0.782563	["ENSG00000002330","ENSG00000171552"]	["BAD","BCL2L1"]
CH000004576	p53 ---Ubc13---> p53{ub{K63}} ubiquitination	2	6	0.69774	0.147467	0.782563	["ENSG00000130985","ENSG00000141510"]	["TP53","UBA1"]
CH000004657	Nrf2 ---> HMOX1	2	6	0.69774	0.147467	0.782563	["ENSG00000102882","ENSG00000198517"]	["MAFK","MAPK3"]
CH000004684	p50:RelA-p65 ---> SELE	2	6	0.69774	0.147467	0.782563	["ENSG00000136807","ENSG00000173039"]	["CDK9","RELA"]
CH000004708	p53 ---> PUMA	4	18	2.09322	0.148095	0.782563	["ENSG00000105327","ENSG00000141510","ENSG00000158406","ENSG00000197061"]	["BBC3","H4C3","H4C8","TP53"]
CH000000767	Notch pathway	6	32	3.72128	0.159562	0.782563	["ENSG00000020256","ENSG00000117362","ENSG00000143801","ENSG00000148400","ENSG00000196498","ENSG00000205155"]	["APH1A","NCOR2","NOTCH1","PSEN2","PSENEN","ZFP64"]
CH000000723	VEGF-A pathway	10	61	7.09369	0.163374	0.782563	["ENSG00000002330","ENSG00000069966","ENSG00000078295","ENSG00000096433","ENSG00000102882","ENSG00000126934","ENSG00000137764","ENSG00000148334","ENSG00000163932","ENSG00000172354"]	["ADCY2","BAD","GNB2","GNB5","ITPR3","MAP2K2","MAP2K5","MAPK3","PRKCD","PTGES2"]
CH000003665	biosynthesis of glycerophospholipids	4	19	2.20951	0.171463	0.782563	["ENSG00000067113","ENSG00000129951","ENSG00000141934","ENSG00000143845"]	["ETNK2","PLPP1","PLPP2","PLPPR3 (ENSG00000129951)"]
CH000000758	stress-associated pathways	16	108	12.5593	0.180484	0.782563	["ENSG00000011485","ENSG00000034152","ENSG00000076984","ENSG00000087088","ENSG00000099804","ENSG00000102882","ENSG00000106211","ENSG00000108344","ENSG00000121653","ENSG00000126934","ENSG00000127191","ENSG00000130985","ENSG00000141480","ENSG00000141510","ENSG00000173327","ENSG00000204231"]	["ARRB2","BAX","CDC34","HSPB1","MAP2K2","MAP2K3","MAP2K7","MAP3K11","MAPK3","MAPK8IP1","PPP5C","PSMD3","RXRB (ENSG00000204231)","TP53","TRAF2","UBA1"]
CH000000008	fMLP ---Gz---> cAMP	3	13	1.51177	0.185369	0.782563	["ENSG00000069966","ENSG00000078295","ENSG00000172354"]	["ADCY2","GNB2","GNB5"]
CH000000009	fMLP ---Go-1---> cAMP	3	13	1.51177	0.185369	0.782563	["ENSG00000069966","ENSG00000078295","ENSG00000172354"]	["ADCY2","GNB2","GNB5"]
CH000000763	c-Kit pathway	3	13	1.51177	0.185369	0.782563	["ENSG00000117676","ENSG00000131788","ENSG00000141738"]	["GRB7","PIAS3","RPS6KA1 (ENSG00000117676)"]
CH000000903	Jagged1,2 ---> JICD1,2	3	13	1.51177	0.185369	0.782563	["ENSG00000117362","ENSG00000143801","ENSG00000205155"]	["APH1A","PSEN2","PSENEN"]
CH000004229	BDNF ---p75NTR---> NRIF ubiquitination	3	13	1.51177	0.185369	0.782563	["ENSG00000117362","ENSG00000143801","ENSG00000205155"]	["APH1A","PSEN2","PSENEN"]
CH000004484	KSR scaffold complex	3	13	1.51177	0.185369	0.782563	["ENSG00000105568","ENSG00000126934","ENSG00000204435"]	["CSNK2B (ENSG00000204435)","MAP2K2","PPP2R1A"]
CH000000045	Hsp90 ---> AhR	2	7	0.81403	0.191219	0.782563	["ENSG00000110711","ENSG00000204389"]	["AIP","HSPA1A (ENSG00000204389)"]
CH000003696	2'-deoxycytidine-5'-phosphate ---> DNA-P-UC	2	7	0.81403	0.191219	0.782563	["ENSG00000103024","ENSG00000103202"]	["NME3","NME4"]
CH000004513	IL-5 ---Lyn, dynamin2--/ ERK	2	7	0.81403	0.191219	0.782563	["ENSG00000079805","ENSG00000102882"]	["DNM2","MAPK3"]
CH000004531	mTOR ---/ ulk1	2	7	0.81403	0.191219	0.782563	["ENSG00000167965","ENSG00000204673"]	["AKT1S1","MLST8"]
CH000004705	SLX4 complex	2	7	0.81403	0.191219	0.782563	["ENSG00000012061","ENSG00000188827"]	["ERCC1","SLX4"]
CH000000639	PDGF A ---> ERK	4	20	2.3258	0.196009	0.782563	["ENSG00000078061","ENSG00000102882","ENSG00000126934","ENSG00000137764"]	["ARAF","MAP2K2","MAP2K5","MAPK3"]
CH000000640	PDGF B ---> ERK	4	20	2.3258	0.196009	0.782563	["ENSG00000078061","ENSG00000102882","ENSG00000126934","ENSG00000137764"]	["ARAF","MAP2K2","MAP2K5","MAPK3"]
CH000000629	TNF-alpha ---> p50:RelA-p65	3	14	1.62806	0.216899	0.782563	["ENSG00000067606","ENSG00000127191","ENSG00000173039"]	["PRKCZ","RELA","TRAF2"]
CH000000044	Raf-1 ---> HIF-1alpha	1	2	0.23258	0.219105	0.782563	["ENSG00000126934"]	["MAP2K2"]
CH000000056	Rad23A ---/ p53	1	2	0.23258	0.219105	0.782563	["ENSG00000179262"]	["RAD23A"]
CH000000097	SOCS-3, Jak1 feedback loop	1	2	0.23258	0.219105	0.782563	["ENSG00000184557"]	["SOCS3"]
CH000000109	Bak ---> Caspase-9	1	2	0.23258	0.219105	0.782563	["ENSG00000030110"]	["BAK1"]
CH000000110	Bak ---> Apaf-1	1	2	0.23258	0.219105	0.782563	["ENSG00000030110"]	["BAK1"]
CH000000179	Lck ---> Lnk	1	2	0.23258	0.219105	0.782563	["ENSG00000182866"]	["LCK"]
CH000000224	MKK3 ---p38gamma---> ATF-2	1	2	0.23258	0.219105	0.782563	["ENSG00000034152"]	["MAP2K3"]
CH000000228	MKK6 ---p38gamma---> Elk-1	1	2	0.23258	0.219105	0.782563	["ENSG00000126767"]	["ELK1"]
CH000000241	SIRT1 ---> p53	1	2	0.23258	0.219105	0.782563	["ENSG00000141510"]	["TP53"]
CH000000247	hipk2 ---> p53	1	2	0.23258	0.219105	0.782563	["ENSG00000141510"]	["TP53"]
CH000000251	Plk3 ---> p53	1	2	0.23258	0.219105	0.782563	["ENSG00000141510"]	["TP53"]
CH000000278	RSK1 ---> MITF	1	2	0.23258	0.219105	0.782563	["ENSG00000117676"]	["RPS6KA1 (ENSG00000117676)"]
CH000000288	HDAC1 ---> p53	1	2	0.23258	0.219105	0.782563	["ENSG00000141510"]	["TP53"]
CH000000317	ActR-I ---> Smad3	1	2	0.23258	0.219105	0.782563	["ENSG00000115325"]	["DOK1"]
CH000000318	ActR-II ---> Smad3	1	2	0.23258	0.219105	0.782563	["ENSG00000115325"]	["DOK1"]
CH000000339	TAK1a ---> TAB1	1	2	0.23258	0.219105	0.782563	["ENSG00000100324"]	["TAB1"]
CH000000344	angiotensin II, AT1A, beta-arrestin2, Raf-1, MEK1, ERK2 complex formation and phosphorylation	1	2	0.23258	0.219105	0.782563	["ENSG00000141480"]	["ARRB2"]
CH000000371	PDK1 ---> PRK1	1	2	0.23258	0.219105	0.782563	["ENSG00000123143"]	["PKN1"]
CH000000385	PKAc ---> GSK3alpha	1	2	0.23258	0.219105	0.782563	["ENSG00000105723"]	["GSK3A"]
CH000000386	PKAc ---> GSK3alpha	1	2	0.23258	0.219105	0.782563	["ENSG00000105723"]	["GSK3A"]
CH000000474	MLK3 ---> c-Jun	1	2	0.23258	0.219105	0.782563	["ENSG00000173327"]	["MAP3K11"]
CH000000492	MEK2 ---> MBP	1	2	0.23258	0.219105	0.782563	["ENSG00000126934"]	["MAP2K2"]
CH000000515	MKK4, MKK7 ---JNK1---> ATF-2	1	2	0.23258	0.219105	0.782563	["ENSG00000076984"]	["MAP2K7"]
CH000000520	MKK7 ---> ATF-2	1	2	0.23258	0.219105	0.782563	["ENSG00000076984"]	["MAP2K7"]
CH000000543	IL-4 ---/ p85	1	2	0.23258	0.219105	0.782563	["ENSG00000077238"]	["IL4R"]
CH000000548	FAK1 & Src ---> Nck	1	2	0.23258	0.219105	0.782563	["ENSG00000050820"]	["BCAR1 (ENSG00000050820)"]
CH000000556	Bmx ---> Crk	1	2	0.23258	0.219105	0.782563	["ENSG00000050820"]	["BCAR1 (ENSG00000050820)"]
CH000000676	RA, 15d-PGJ2 ---> RXR-beta, PPAR-gamma	1	2	0.23258	0.219105	0.782563	["ENSG00000204231"]	["RXRB (ENSG00000204231)"]
CH000000808	MEKK2 ---MKK7---> c-Jun	1	2	0.23258	0.219105	0.782563	["ENSG00000076984"]	["MAP2K7"]
CH000000811	ASK1 ---MKK7,JNK1---> c-Jun	1	2	0.23258	0.219105	0.782563	["ENSG00000076984"]	["MAP2K7"]
CH000000950	IL-3 ---> Bad	1	2	0.23258	0.219105	0.782563	["ENSG00000002330"]	["BAD"]
CH000003639	phosphoserine ---> 3-phosphoglycerate	1	2	0.23258	0.219105	0.782563	["ENSG00000092621"]	["PHGDH"]
CH000003646	O-phosphatidyl-L-serine ---> lecithin	1	2	0.23258	0.219105	0.782563	["ENSG00000133027"]	["PEMT"]
CH000003661	phosphoenolpyruvate ---> oxaloacetate	1	2	0.23258	0.219105	0.782563	["ENSG00000100889"]	["PCK2 (ENSG00000100889)"]
CH000003666	2-oxoglutarate ---> 2-hydroxyglutarate	1	2	0.23258	0.219105	0.782563	["ENSG00000146701"]	["MDH2"]
CH000004366	acylglucosylceramide ---> free fatty acid	1	2	0.23258	0.219105	0.782563	["ENSG00000070610"]	["GBA2"]
CH000004398	RXR-beta, VDR heterodimerization	1	2	0.23258	0.219105	0.782563	["ENSG00000204231"]	["RXRB (ENSG00000204231)"]
CH000004408	NICD1 ---> c-myc	1	2	0.23258	0.219105	0.782563	["ENSG00000148400"]	["NOTCH1"]
CH000004425	1,4-butanediol ---> 3-butenoyl-CoA	1	2	0.23258	0.219105	0.782563	["ENSG00000117448"]	["AKR1A1"]
CH000004551	PIAS3 ---/ STAT3	1	2	0.23258	0.219105	0.782563	["ENSG00000131788"]	["PIAS3"]
CH000003599	formation and degradation of triacylglycerols	6	36	4.18644	0.234619	0.782563	["ENSG00000067113","ENSG00000129951","ENSG00000141934","ENSG00000169692","ENSG00000185000","ENSG00000204310"]	["AGPAT1 (ENSG00000204310)","AGPAT2","DGAT1 (ENSG00000185000)","PLPP1","PLPP2","PLPPR3 (ENSG00000129951)"]
CH000000020	fMLP ---> NFkappaB	2	8	0.93032	0.236357	0.782563	["ENSG00000104856","ENSG00000173039"]	["RELA","RELB"]
CH000000466	EDAR ---> NF-kappaB	2	8	0.93032	0.236357	0.782563	["ENSG00000104856","ENSG00000173039"]	["RELA","RELB"]
CH000000663	Hsp90 ---> AhR	2	8	0.93032	0.236357	0.782563	["ENSG00000110711","ENSG00000204389"]	["AIP","HSPA1A (ENSG00000204389)"]
CH000000780	EDA-A2 ---> c-Jun	2	8	0.93032	0.236357	0.782563	["ENSG00000076984","ENSG00000127191"]	["MAP2K7","TRAF2"]
CH000000815	POSH ---> JNK1, JNK2	2	8	0.93032	0.236357	0.782563	["ENSG00000076984","ENSG00000173327"]	["MAP2K7","MAP3K11"]
CH000000964	E1 ---Siah-2---/ synphilin-1	2	8	0.93032	0.236357	0.782563	["ENSG00000130985","ENSG00000181788"]	["SIAH2","UBA1"]
CH000000999	EGF ---> c-Fos	2	8	0.93032	0.236357	0.782563	["ENSG00000102882","ENSG00000117676"]	["MAPK3","RPS6KA1 (ENSG00000117676)"]
CH000003568	glucose-1-p ---> UDP-D-galactose	2	8	0.93032	0.236357	0.782563	["ENSG00000117411","ENSG00000213930"]	["B4GALT2","GALT"]
CH000003585	lactose metabolism	2	8	0.93032	0.236357	0.782563	["ENSG00000117411","ENSG00000213930"]	["B4GALT2","GALT"]
CH000003616	L-proline, 2-oxoglutarate ---> D-4-hydroxy-2-oxoglutarate, L-glutamate	2	8	0.93032	0.236357	0.782563	["ENSG00000159423","ENSG00000183010"]	["ALDH4A1","PYCR1"]
CH000003698	2'-deoxyuridine 5'-phosphate ---> deoxythymidine 5'-triphosphate	2	8	0.93032	0.236357	0.782563	["ENSG00000103024","ENSG00000103202"]	["NME3","NME4"]
CH000004350	TNF ---MEKK1---> c-Jun	2	8	0.93032	0.236357	0.782563	["ENSG00000076984","ENSG00000127191"]	["MAP2K7","TRAF2"]
CH000004536	IL-6 signaling	2	8	0.93032	0.236357	0.782563	["ENSG00000131788","ENSG00000197122"]	["PIAS3","SRC"]
CH000004623	MIC2-isoform2 ---FosB---> MMP9	2	8	0.93032	0.236357	0.782563	["ENSG00000126767","ENSG00000197122"]	["ELK1","SRC"]
CH000004640	transcriptional regulation of ECM components	2	8	0.93032	0.236357	0.782563	["ENSG00000068323","ENSG00000099917"]	["MED15","TFE3"]
CH000000736	PDGF pathway	9	59	6.86111	0.241208	0.782563	["ENSG00000050820","ENSG00000067606","ENSG00000078061","ENSG00000096433","ENSG00000102882","ENSG00000126934","ENSG00000137764","ENSG00000163932","ENSG00000197122"]	["ARAF","BCAR1 (ENSG00000050820)","ITPR3","MAP2K2","MAP2K5","MAPK3","PRKCD","PRKCZ","SRC"]
CH000000567	OSM ---> ERK	4	22	2.55838	0.247907	0.782563	["ENSG00000078061","ENSG00000102882","ENSG00000126934","ENSG00000137764"]	["ARAF","MAP2K2","MAP2K5","MAPK3"]
CH000000010	fMLP ---Gi---> cAMP	3	15	1.74435	0.249431	0.782563	["ENSG00000069966","ENSG00000078295","ENSG00000172354"]	["ADCY2","GNB2","GNB5"]
CH000000751	T-cell antigen receptor pathway	12	84	9.76836	0.265193	0.782563	["ENSG00000076984","ENSG00000078061","ENSG00000096433","ENSG00000099804","ENSG00000102882","ENSG00000103653","ENSG00000106683","ENSG00000126767","ENSG00000126934","ENSG00000137764","ENSG00000173039","ENSG00000182866"]	["ARAF","CDC34","CSK","ELK1","ITPR3","LCK","LIMK1","MAP2K2","MAP2K5","MAP2K7","MAPK3","RELA"]
CH000004674	EP2 ---> BDNF	4	23	2.67467	0.274896	0.782563	["ENSG00000069966","ENSG00000078295","ENSG00000148334","ENSG00000172354"]	["ADCY2","GNB2","GNB5","PTGES2"]
CH000000016	fMLP ---> NADPH oxidase	2	9	1.04661	0.28197	0.782563	["ENSG00000067606","ENSG00000169750"]	["PRKCZ","RAC3"]
CH000000721	SMRT ---/ AhR	2	9	1.04661	0.28197	0.782563	["ENSG00000110711","ENSG00000196498"]	["AIP","NCOR2"]
CH000003622	UDP-glucose ---> D-glucose	2	9	1.04661	0.28197	0.782563	["ENSG00000079739","ENSG00000156515"]	["HK1","PGM1"]
CH000003654	glycogen degradation	2	9	1.04661	0.28197	0.782563	["ENSG00000079739","ENSG00000156515"]	["HK1","PGM1"]
CH000003773	GDP ---> dGTP	2	9	1.04661	0.28197	0.782563	["ENSG00000103024","ENSG00000103202"]	["NME3","NME4"]
CH000003778	ADP ---> dATP	2	9	1.04661	0.28197	0.782563	["ENSG00000103024","ENSG00000103202"]	["NME3","NME4"]
CH000004637	LKB1 ---AMPKalpha-2, AMPKbeta-2---> PPARalpha	2	9	1.04661	0.28197	0.782563	["ENSG00000067606","ENSG00000118046"]	["PRKCZ","STK11"]
CH000004391	mGluR1---> PLCbeta1 ---> IP3R:IP3	3	16	1.86064	0.282625	0.782563	["ENSG00000069966","ENSG00000096433","ENSG00000172354"]	["GNB2","GNB5","ITPR3"]
CH000000569	LPS _> NF_kappaB 6	5	31	3.60499	0.288664	0.782563	["ENSG00000099804","ENSG00000100324","ENSG00000130159","ENSG00000130985","ENSG00000173039"]	["CDC34","ECSIT","RELA","TAB1","UBA1"]
CH000000651	Insulin ---> AKT-1 pathway	6	39	4.53531	0.296812	0.782563	["ENSG00000002330","ENSG00000067606","ENSG00000104812","ENSG00000105723","ENSG00000111319","ENSG00000172531"]	["BAD","GSK3A","GYS1","PPP1CA","PRKCZ","SCNN1A"]
CH000004572	EGF ---Raf-1---> ERK2	4	24	2.79096	0.302344	0.782563	["ENSG00000105568","ENSG00000112640","ENSG00000126934","ENSG00000204435"]	["CSNK2B (ENSG00000204435)","MAP2K2","PPP2R1A","PPP2R5D"]
CH000000710	p53 pathway	15	111	12.9082	0.304834	0.782563	["ENSG00000030110","ENSG00000099956","ENSG00000105327","ENSG00000108344","ENSG00000130985","ENSG00000140464","ENSG00000141510","ENSG00000158406","ENSG00000163932","ENSG00000166851","ENSG00000167965","ENSG00000171552","ENSG00000197061","ENSG00000197122","ENSG00000204435"]	["BAK1","BBC3","BCL2L1","CSNK2B (ENSG00000204435)","H4C3","H4C8","MLST8","PLK1","PML","PRKCD","PSMD3","SMARCB1 (ENSG00000099956)","SRC","TP53","UBA1"]
CH000000003	Rac1 ---/ cofilin	1	3	0.34887	0.310001	0.782563	["ENSG00000106683"]	["LIMK1"]
CH000000037	IL-3 ---/ 4E-BP1	1	3	0.34887	0.310001	0.782563	["ENSG00000187840"]	["EIF4EBP1"]
CH000000061	Lck ---> RhoA	1	3	0.34887	0.310001	0.782563	["ENSG00000182866"]	["LCK"]
CH000000089	Jak1 ---> STAT6:STAT2	1	3	0.34887	0.310001	0.782563	["ENSG00000166888"]	["STAT6"]
CH000000090	Jak1 ---> STAT6:IFNAR1	1	3	0.34887	0.310001	0.782563	["ENSG00000166888"]	["STAT6"]
CH000000111	Apaf-1 ---> Bcl-x:Caspase-9	1	3	0.34887	0.310001	0.782563	["ENSG00000171552"]	["BCL2L1"]
CH000000146	angiotensin II ---> Tyk2	1	3	0.34887	0.310001	0.782563	["ENSG00000105397"]	["TYK2"]
CH000000148	angiotensin II ---> Cas	1	3	0.34887	0.310001	0.782563	["ENSG00000050820"]	["BCAR1 (ENSG00000050820)"]
CH000000161	p53 ---> APC:Siah1	1	3	0.34887	0.310001	0.782563	["ENSG00000141510"]	["TP53"]
CH000000163	MT1-MMP ---> mmp2	1	3	0.34887	0.310001	0.782563	["ENSG00000157227"]	["MMP14"]
CH000000178	Lck ---> CD3zeta:Lnk	1	3	0.34887	0.310001	0.782563	["ENSG00000182866"]	["LCK"]
CH000000216	MKK4 ---> Elk-1	1	3	0.34887	0.310001	0.782563	["ENSG00000126767"]	["ELK1"]
CH000000222	MKK6 ---p38beta---> Elk-1	1	3	0.34887	0.310001	0.782563	["ENSG00000126767"]	["ELK1"]
CH000000230	Cdc42, Pard6a, PKCzeta complex formation	1	3	0.34887	0.310001	0.782563	["ENSG00000067606"]	["PRKCZ"]
CH000000231	Rac1, Pard6a, PKCzeta complex formation	1	3	0.34887	0.310001	0.782563	["ENSG00000067606"]	["PRKCZ"]
CH000000309	tBid-p13 ---> Cytochrome C	1	3	0.34887	0.310001	0.782563	["ENSG00000087088"]	["BAX"]
CH000000315	c-Kit, p62Dok-1, tec complex formation	1	3	0.34887	0.310001	0.782563	["ENSG00000115325"]	["DOK1"]
CH000000320	CH000000320	1	3	0.34887	0.310001	0.782563	["ENSG00000184557"]	["SOCS3"]
CH000000343	AT1A ---> Raf-1	1	3	0.34887	0.310001	0.782563	["ENSG00000141480"]	["ARRB2"]
CH000000372	PDK1 ---> rhoB:PRK1	1	3	0.34887	0.310001	0.782563	["ENSG00000123143"]	["PKN1"]
CH000000457	ErbB1 ---> Nck	1	3	0.34887	0.310001	0.782563	["ENSG00000115325"]	["DOK1"]
CH000000478	ASK1 ---MKK7,JNK2---> c-Jun	1	3	0.34887	0.310001	0.782563	["ENSG00000076984"]	["MAP2K7"]
CH000000479	ASK1 ---MKK3---> c-Jun	1	3	0.34887	0.310001	0.782563	["ENSG00000034152"]	["MAP2K3"]
CH000000482	TAO2 ---MKK3---> p38alpha	1	3	0.34887	0.310001	0.782563	["ENSG00000034152"]	["MAP2K3"]
CH000000489	PP5 ---/ MKK6	1	3	0.34887	0.310001	0.782563	["ENSG00000011485"]	["PPP5C"]
CH000000491	GCK ---> MLK3	1	3	0.34887	0.310001	0.782563	["ENSG00000173327"]	["MAP3K11"]
CH000000511	TAO1 ---> p38alpha	1	3	0.34887	0.310001	0.782563	["ENSG00000034152"]	["MAP2K3"]
CH000000516	MKK4, MKK7 ---JNK2---> ATF-2	1	3	0.34887	0.310001	0.782563	["ENSG00000076984"]	["MAP2K7"]
CH000000526	Cas ---/ RalA	1	3	0.34887	0.310001	0.782563	["ENSG00000050820"]	["BCAR1 (ENSG00000050820)"]
CH000000564	mTOR ---> eIF4E	1	3	0.34887	0.310001	0.782563	["ENSG00000187840"]	["EIF4EBP1"]
CH000000617	Rac1 ---MLK3---> c-Jun	1	3	0.34887	0.310001	0.782563	["ENSG00000173327"]	["MAP3K11"]
CH000000637	PDGF A ---> Src	1	3	0.34887	0.310001	0.782563	["ENSG00000197122"]	["SRC"]
CH000000638	PDGF B ---> Src	1	3	0.34887	0.310001	0.782563	["ENSG00000197122"]	["SRC"]
CH000000702	ATR ---> p53	1	3	0.34887	0.310001	0.782563	["ENSG00000141510"]	["TP53"]
CH000000703	ATM ---> p53	1	3	0.34887	0.310001	0.782563	["ENSG00000141510"]	["TP53"]
CH000000705	MKK6 ---> p53	1	3	0.34887	0.310001	0.782563	["ENSG00000141510"]	["TP53"]
CH000000716	JAB1 ---> HIF-1alpha	1	3	0.34887	0.310001	0.782563	["ENSG00000141510"]	["TP53"]
CH000000744	tuberin ---> Rheb	1	3	0.34887	0.310001	0.782563	["ENSG00000103197"]	["TSC2"]
CH000000807	MKK7 ---> c-Jun	1	3	0.34887	0.310001	0.782563	["ENSG00000076984"]	["MAP2K7"]
CH000000809	MEKK2 ---MKK7---> JNK1	1	3	0.34887	0.310001	0.782563	["ENSG00000076984"]	["MAP2K7"]
CH000000814	ASK1 ---> ATF-2	1	3	0.34887	0.310001	0.782563	["ENSG00000034152"]	["MAP2K3"]
CH000000828	AKT-1 ---/ JNK1	1	3	0.34887	0.310001	0.782563	["ENSG00000076984"]	["MAP2K7"]
CH000000833	Caspase-3 ---> Bax	1	3	0.34887	0.310001	0.782563	["ENSG00000087088"]	["BAX"]
CH000000835	JNK2 ---> doublecortin	1	3	0.34887	0.310001	0.782563	["ENSG00000121653"]	["MAPK8IP1"]
CH000000844	ERK1 ---> eIF-4E	1	3	0.34887	0.310001	0.782563	["ENSG00000102882"]	["MAPK3"]
CH000000852	MLK2 ---MKK3---> p38alpha	1	3	0.34887	0.310001	0.782563	["ENSG00000034152"]	["MAP2K3"]
CH000000874	ERK1 ---/ Tau	1	3	0.34887	0.310001	0.782563	["ENSG00000102882"]	["MAPK3"]
CH000000893	Caspase-3 ---/ K18	1	3	0.34887	0.310001	0.782563	["ENSG00000111057"]	["KRT18"]
CH000000894	Rac1 ---> golgin-160	1	3	0.34887	0.310001	0.782563	["ENSG00000173327"]	["MAP3K11"]
CH000000905	Aurora-A(h) ---/ p53(h)	1	3	0.34887	0.310001	0.782563	["ENSG00000141510"]	["TP53"]
CH000000972	Abl ---/ Bcl-xL	1	3	0.34887	0.310001	0.782563	["ENSG00000171552"]	["BCL2L1"]
CH000000989	CtBP ---/ p53	1	3	0.34887	0.310001	0.782563	["ENSG00000141510"]	["TP53"]
CH000001014	Cleavage, modifications, secretion of Sonic Hedgehog and its binding to the receptor	1	3	0.34887	0.310001	0.782563	["ENSG00000128602"]	["SMO"]
CH000001025	H2O2 ---> Pyk2	1	3	0.34887	0.310001	0.782563	["ENSG00000197122"]	["SRC"]
CH000001026	importin-alpha3 ---> NFkappaB	1	3	0.34887	0.310001	0.782563	["ENSG00000173039"]	["RELA"]
CH000003570	acetyl-CoA ---> palmitic acid	1	3	0.34887	0.310001	0.782563	["ENSG00000169710"]	["FASN"]
CH000003575	L-glutamine ---> uridine-5'-phosphate	1	3	0.34887	0.310001	0.782563	["ENSG00000084774"]	["CAD"]
CH000003576	synthesis of pyrimidine ribonucleotides	1	3	0.34887	0.310001	0.782563	["ENSG00000084774"]	["CAD"]
CH000003623	L-proline ---> L-ornithine, 2-oxoglutarate	1	3	0.34887	0.310001	0.782563	["ENSG00000159423"]	["ALDH4A1"]
CH000003632	glucose-1-phosphate ---> glucose-6-phosphate	1	3	0.34887	0.310001	0.782563	["ENSG00000079739"]	["PGM1"]
CH000003703	L-glutamate ---> L-proline	1	3	0.34887	0.310001	0.782563	["ENSG00000183010"]	["PYCR1"]
CH000004344	GluR6 ---> MLK3{p}	1	3	0.34887	0.310001	0.782563	["ENSG00000173327"]	["MAP3K11"]
CH000004409	alpha-enolase (MBP-1) ---NICD1---/ c-myc	1	3	0.34887	0.310001	0.782563	["ENSG00000148400"]	["NOTCH1"]
CH000004464	c-Kit ---> Grb-7	1	3	0.34887	0.310001	0.782563	["ENSG00000141738"]	["GRB7"]
CH000004514	p53 ---Mdm2--> p53 monoubiquitination	1	3	0.34887	0.310001	0.782563	["ENSG00000141510"]	["TP53"]
CH000004561	STAT3 ---IkappaBzeta---/ MCL1	1	3	0.34887	0.310001	0.782563	["ENSG00000197122"]	["SRC"]
CH000004565	IL-16 ---> Lck	1	3	0.34887	0.310001	0.782563	["ENSG00000182866"]	["LCK"]
CH000004686	hipk2 ---> C/EBPbeta	1	3	0.34887	0.310001	0.782563	["ENSG00000172216"]	["CEBPB"]
CH000004691	oxysterol ---> apoE	1	3	0.34887	0.310001	0.782563	["ENSG00000131408"]	["NR1H2"]
CH000004718	STAT3 ---/ TP53	1	3	0.34887	0.310001	0.782563	["ENSG00000197122"]	["SRC"]
CH000000643	PDGF B ---> DAG, IP3	3	17	1.97693	0.31617	0.782563	["ENSG00000067606","ENSG00000096433","ENSG00000163932"]	["ITPR3","PRKCD","PRKCZ"]
CH000000644	PDGF A ---> DAG, IP3	3	17	1.97693	0.31617	0.782563	["ENSG00000067606","ENSG00000096433","ENSG00000163932"]	["ITPR3","PRKCD","PRKCZ"]
CH000003603	biosynthesis of pterines	3	17	1.97693	0.31617	0.782563	["ENSG00000136877","ENSG00000176974","ENSG00000182199"]	["FPGS","SHMT1 (ENSG00000176974)","SHMT2"]
CH000003781	interconversion and degradation of purine deoxyribonucleotides	3	17	1.97693	0.31617	0.782563	["ENSG00000103024","ENSG00000103202","ENSG00000143774"]	["GUK1","NME3","NME4"]
CH000004275	NR2A:NR2B ---Pyk2---MEK2---> ERK1	3	17	1.97693	0.31617	0.782563	["ENSG00000102882","ENSG00000126934","ENSG00000197122"]	["MAP2K2","MAPK3","SRC"]
CH000004519	TLR9 ---IRAK1---> MKK3, MKK4	3	17	1.97693	0.31617	0.782563	["ENSG00000034152","ENSG00000100324","ENSG00000130985"]	["MAP2K3","TAB1","UBA1"]
CH000004634	TGFbetaR_I _> ERK	3	17	1.97693	0.31617	0.782563	["ENSG00000102882","ENSG00000126767","ENSG00000197122"]	["ELK1","MAPK3","SRC"]
CH000000926	PRL pathway	7	48	5.58192	0.321415	0.782563	["ENSG00000078061","ENSG00000102882","ENSG00000105723","ENSG00000126934","ENSG00000137764","ENSG00000184557","ENSG00000197122"]	["ARAF","GSK3A","MAP2K2","MAP2K5","MAPK3","SOCS3","SRC"]
CH000000593	IFNgamma ---> STAT1alpha	2	10	1.1629	0.32734	0.782563	["ENSG00000163932","ENSG00000204389"]	["HSPA1A (ENSG00000204389)","PRKCD"]
CH000003710	proline and hydroxy proline metabolism	2	10	1.1629	0.32734	0.782563	["ENSG00000159423","ENSG00000183010"]	["ALDH4A1","PYCR1"]
CH000004246	sphinganine ---> ceramide-2,3,6,7	2	10	1.1629	0.32734	0.782563	["ENSG00000090661","ENSG00000223802"]	["CERS1","CERS4"]
CH000000756	OSM pathway	4	25	2.90725	0.330084	0.782563	["ENSG00000078061","ENSG00000102882","ENSG00000126934","ENSG00000137764"]	["ARAF","MAP2K2","MAP2K5","MAPK3"]
CH000004707	p53 ---> p21Cip1	3	18	2.09322	0.349785	0.782563	["ENSG00000141510","ENSG00000158406","ENSG00000197061"]	["H4C3","H4C8","TP53"]
CH000000759	EDAR pathway	4	26	3.02354	0.357956	0.782563	["ENSG00000076984","ENSG00000104856","ENSG00000127191","ENSG00000173039"]	["MAP2K7","RELA","RELB","TRAF2"]
CH000004676	prostanoid receptor signaling	4	26	3.02354	0.357956	0.782563	["ENSG00000069966","ENSG00000078295","ENSG00000148334","ENSG00000172354"]	["ADCY2","GNB2","GNB5","PTGES2"]
CH000004724	SDF-1 (CXCL12) mediated signaling	4	26	3.02354	0.357956	0.782563	["ENSG00000069966","ENSG00000096433","ENSG00000172354","ENSG00000197122"]	["GNB2","GNB5","ITPR3","SRC"]
CH000004647	angiotensin II ---> DAG, CaMKII	5	34	3.95386	0.361047	0.782563	["ENSG00000067606","ENSG00000069966","ENSG00000096433","ENSG00000163932","ENSG00000172354"]	["GNB2","GNB5","ITPR3","PRKCD","PRKCZ"]
CH000000820	TLR3 pathway	6	42	4.88418	0.361765	0.782563	["ENSG00000099804","ENSG00000100324","ENSG00000126456","ENSG00000130159","ENSG00000130985","ENSG00000173039"]	["CDC34","ECSIT","IRF3","RELA","TAB1","UBA1"]
CH000000612	BCR ---MLK3---> c-Jun	2	11	1.27919	0.371909	0.782563	["ENSG00000110651","ENSG00000173327"]	["CD81","MAP3K11"]
CH000003702	L-leucine, 2-oxoglutarate ---> acetoacetate, acetyl-CoA	2	11	1.27919	0.371909	0.782563	["ENSG00000105953","ENSG00000117305"]	["HMGCL","OGDH"]
CH000004281	NR2B:NR2C ---RasGRF1---MEK2---> ERK1	2	11	1.27919	0.371909	0.782563	["ENSG00000102882","ENSG00000126934"]	["MAP2K2","MAPK3"]
CH000004302	1-alkenyl-2-acyl-glycerol-3-phosphoethanolamine ---> plasmenylcholine	2	11	1.27919	0.371909	0.782563	["ENSG00000032444","ENSG00000067113"]	["PLPP1","PNPLA6"]
CH000004339	metabolism of phosphatidylserine and phosphatidylethanolamine	2	11	1.27919	0.371909	0.782563	["ENSG00000143845","ENSG00000174915"]	["ETNK2","PTDSS2 (ENSG00000174915)"]
CH000004340	ethanolamine ---> O-phosphatidyl-L-serine	2	11	1.27919	0.371909	0.782563	["ENSG00000143845","ENSG00000174915"]	["ETNK2","PTDSS2 (ENSG00000174915)"]
CH000004625	MIC2 signaling	2	11	1.27919	0.371909	0.782563	["ENSG00000126767","ENSG00000197122"]	["ELK1","SRC"]
CH000004191	ErbB3 ---> survival	7	51	5.93079	0.381273	0.782563	["ENSG00000002330","ENSG00000102882","ENSG00000105723","ENSG00000126767","ENSG00000130985","ENSG00000167965","ENSG00000171552"]	["BAD","BCL2L1","ELK1","GSK3A","MAPK3","MLST8","UBA1"]
CH000000824	dsRNA ---> p50:RelA	3	19	2.20951	0.38322	0.782563	["ENSG00000099804","ENSG00000130159","ENSG00000173039"]	["CDC34","ECSIT","RELA"]
CH000000898	Apo2L pathway	3	19	2.20951	0.38322	0.782563	["ENSG00000030110","ENSG00000087088","ENSG00000168040"]	["BAK1","BAX","FADD"]
CH000004725	SDF-1 ---> calcium mobilization	3	19	2.20951	0.38322	0.782563	["ENSG00000069966","ENSG00000096433","ENSG00000172354"]	["GNB2","GNB5","ITPR3"]
CH000000746	IL_1 pathway 1	6	43	5.00047	0.383677	0.782563	["ENSG00000099804","ENSG00000100324","ENSG00000126767","ENSG00000130159","ENSG00000130985","ENSG00000173039"]	["CDC34","ECSIT","ELK1","RELA","TAB1","UBA1"]
CH000004475	IL-3 signaling	6	43	5.00047	0.383677	0.782563	["ENSG00000002330","ENSG00000102882","ENSG00000117676","ENSG00000167965","ENSG00000171552","ENSG00000187840"]	["BAD","BCL2L1","EIF4EBP1","MAPK3","MLST8","RPS6KA1 (ENSG00000117676)"]
CH000000697	IL-1beta ---> p50:RelA	5	35	4.07015	0.385411	0.782563	["ENSG00000099804","ENSG00000100324","ENSG00000130159","ENSG00000130985","ENSG00000173039"]	["CDC34","ECSIT","RELA","TAB1","UBA1"]
CH000000028	angiotensin II ---> ERK2	1	4	0.46516	0.390354	0.782563	["ENSG00000141480"]	["ARRB2"]
CH000000055	RabGGTase ---> Rab7	1	4	0.46516	0.390354	0.782563	["ENSG00000100949"]	["RABGGTA (ENSG00000100949)"]
CH000000096	Cdc34 ---> IkappaB-alpha	1	4	0.46516	0.390354	0.782563	["ENSG00000099804"]	["CDC34"]
CH000000153	MEKK1 ---> NF-kappaB:Trx1	1	4	0.46516	0.390354	0.782563	["ENSG00000173039"]	["RELA"]
CH000000155	MKK4 ---> NF-kappaB:Trx1	1	4	0.46516	0.390354	0.782563	["ENSG00000173039"]	["RELA"]
CH000000217	MKK3 ---> ATF-2	1	4	0.46516	0.390354	0.782563	["ENSG00000034152"]	["MAP2K3"]
CH000000220	MKK6 ---p38alpha---> Elk-1	1	4	0.46516	0.390354	0.782563	["ENSG00000126767"]	["ELK1"]
CH000000467	TNF-alpha ---TRAF2---> c-Jun	1	4	0.46516	0.390354	0.782563	["ENSG00000127191"]	["TRAF2"]
CH000000481	MLK2, MEKK1 ---> c-Jun	1	4	0.46516	0.390354	0.782563	["ENSG00000076984"]	["MAP2K7"]
CH000000517	MKK3 ---> ATF-2	1	4	0.46516	0.390354	0.782563	["ENSG00000034152"]	["MAP2K3"]
CH000000529	MKK3 ---> HNF-1alpha	1	4	0.46516	0.390354	0.782563	["ENSG00000034152"]	["MAP2K3"]
CH000000530	MKK6 ---> Hsp27	1	4	0.46516	0.390354	0.782563	["ENSG00000106211"]	["HSPB1"]
CH000000557	vitronectin ---> PAK4	1	4	0.46516	0.390354	0.782563	["ENSG00000130669"]	["PAK4"]
CH000000565	mTOR ---> S6	1	4	0.46516	0.390354	0.782563	["ENSG00000175634"]	["RPS6KB2"]
CH000000613	Rac1 ---/ cofilin	1	4	0.46516	0.390354	0.782563	["ENSG00000106683"]	["LIMK1"]
CH000000675	MKK4 ---/ PPAR-gamma	1	4	0.46516	0.390354	0.782563	["ENSG00000204231"]	["RXRB (ENSG00000204231)"]
CH000000706	MKP-5 ---/ p53; MKK4 ---> p53	1	4	0.46516	0.390354	0.782563	["ENSG00000141510"]	["TP53"]
CH000000728	EGF ---> STAT1alpha	1	4	0.46516	0.390354	0.782563	["ENSG00000197122"]	["SRC"]
CH000000742	SOCS-3 ---/ EpoR	1	4	0.46516	0.390354	0.782563	["ENSG00000184557"]	["SOCS3"]
CH000000745	tuberin ---/ beta-catenin	1	4	0.46516	0.390354	0.782563	["ENSG00000103197"]	["TSC2"]
CH000000806	MKK4 ---> c-Jun	1	4	0.46516	0.390354	0.782563	["ENSG00000076984"]	["MAP2K7"]
CH000000857	MEKK3 ---> ATF-2	1	4	0.46516	0.390354	0.782563	["ENSG00000034152"]	["MAP2K3"]
CH000000863	ASK1 ---> p38alpha	1	4	0.46516	0.390354	0.782563	["ENSG00000127191"]	["TRAF2"]
CH000000867	Abl ---> p73alpha	1	4	0.46516	0.390354	0.782563	["ENSG00000127445"]	["PIN1"]
CH000000892	Caspase-8 ---> Cytochrome C	1	4	0.46516	0.390354	0.782563	["ENSG00000030110"]	["BAK1"]
CH000000896	granzyme B ---> Cytochrome C	1	4	0.46516	0.390354	0.782563	["ENSG00000087088"]	["BAX"]
CH000000897	Apo2L ---> Caspase-10	1	4	0.46516	0.390354	0.782563	["ENSG00000168040"]	["FADD"]
CH000000924	Cdk2 ---> p53	1	4	0.46516	0.390354	0.782563	["ENSG00000141510"]	["TP53"]
CH000000925	PRL ---> STAT5A	1	4	0.46516	0.390354	0.782563	["ENSG00000131788"]	["PIAS3"]
CH000000936	PRL ---Src---> STAT5B	1	4	0.46516	0.390354	0.782563	["ENSG00000197122"]	["SRC"]
CH000000945	SOCS-3 ---/ PRLR	1	4	0.46516	0.390354	0.782563	["ENSG00000184557"]	["SOCS3"]
CH000000970	ATR ---/ Mdm2	1	4	0.46516	0.390354	0.782563	["ENSG00000140464"]	["PML"]
CH000001007	beta-catenin ---/ KAI1	1	4	0.46516	0.390354	0.782563	["ENSG00000183207"]	["RUVBL2"]
CH000001017	Internalization of Smo	1	4	0.46516	0.390354	0.782563	["ENSG00000175416"]	["CLTB"]
CH000001021	Smo-prim ---Fu---> Gli1	1	4	0.46516	0.390354	0.782563	["ENSG00000128602"]	["SMO"]
CH000003554	borealin ---> Aurora-B	1	4	0.46516	0.390354	0.782563	["ENSG00000178999"]	["AURKB"]
CH000003674	L-aspartate ---> L-asparagine, L-glutamate	1	4	0.46516	0.390354	0.782563	["ENSG00000084774"]	["CAD"]
CH000003715	lysine ---> carnitine	1	4	0.46516	0.390354	0.782563	["ENSG00000083444"]	["PLOD1"]
CH000003812	heme, globin ---> bilirubin beta-diglucuronide	1	4	0.46516	0.390354	0.782563	["ENSG00000090013"]	["BLVRB"]
CH000003813	hemoglobin oxidation	1	4	0.46516	0.390354	0.782563	["ENSG00000090013"]	["BLVRB"]
CH000004215	MEKK2 ---ERK5---> MEF-2C	1	4	0.46516	0.390354	0.782563	["ENSG00000137764"]	["MAP2K5"]
CH000004286	GD3 ---> GQ1b, GQ1balpha	1	4	0.46516	0.390354	0.782563	["ENSG00000157350"]	["ST3GAL2"]
CH000004343	CDK5 ---> Unc18A	1	4	0.46516	0.390354	0.782563	["ENSG00000136854"]	["STXBP1"]
CH000004438	Ubc5C ubiquitin conjugation	1	4	0.46516	0.390354	0.782563	["ENSG00000130985"]	["UBA1"]
CH000004439	Ubc5A ubiquitin conjugation	1	4	0.46516	0.390354	0.782563	["ENSG00000130985"]	["UBA1"]
CH000004500	SOCS-3 ---/ leptin	1	4	0.46516	0.390354	0.782563	["ENSG00000184557"]	["SOCS3"]
CH000004341	ER-alpha pathway	8	60	6.9774	0.397188	0.782563	["ENSG00000103266","ENSG00000126803","ENSG00000130985","ENSG00000158406","ENSG00000172216","ENSG00000197061","ENSG00000204388","ENSG00000204389"]	["CEBPB","H4C3","H4C8","HSPA1A (ENSG00000204389)","HSPA1B (ENSG00000204388)","HSPA2","STUB1","UBA1"]
CH000000851	JNK pathway	10	77	8.95433	0.405588	0.782563	["ENSG00000030110","ENSG00000076984","ENSG00000087088","ENSG00000099804","ENSG00000108344","ENSG00000121653","ENSG00000130985","ENSG00000141480","ENSG00000173327","ENSG00000204231"]	["ARRB2","BAK1","BAX","CDC34","MAP2K7","MAP3K11","MAPK8IP1","PSMD3","RXRB (ENSG00000204231)","UBA1"]
CH000004501	leptin signaling	6	44	5.11676	0.4056	0.782563	["ENSG00000067606","ENSG00000102882","ENSG00000118046","ENSG00000167965","ENSG00000178188","ENSG00000184557"]	["MAPK3","MLST8","PRKCZ","SH2B1","SOCS3","STK11"]
CH000000005	G-beta:G-gamma ---> PIP3	2	12	1.39548	0.41525	0.782563	["ENSG00000069966","ENSG00000172354"]	["GNB2","GNB5"]
CH000000013	cAMP ---> PPAR-alpha	2	12	1.39548	0.41525	0.782563	["ENSG00000078295","ENSG00000164742"]	["ADCY1","ADCY2"]
CH000000470	RANKL ---> p38	2	12	1.39548	0.41525	0.782563	["ENSG00000104856","ENSG00000173039"]	["RELA","RELB"]
CH000000956	E1 ---/ alpha-tubulin	2	12	1.39548	0.41525	0.782563	["ENSG00000127824","ENSG00000130985"]	["TUBA4A","UBA1"]
CH000003692	cytidine 5'-phosphate ---> RNA-P-C	2	12	1.39548	0.41525	0.782563	["ENSG00000103024","ENSG00000103202"]	["NME3","NME4"]
CH000004337	PtdIns ---> PtdIns(4)P	2	12	1.39548	0.41525	0.782563	["ENSG00000143393","ENSG00000204084"]	["INPP5B","PI4KB"]
CH000004390	NICD1 ---> RBPJK (CBF1)	2	12	1.39548	0.41525	0.782563	["ENSG00000148400","ENSG00000196498"]	["NCOR2","NOTCH1"]
CH000004539	AKT-1 ---PRAS40---> mTOR	2	12	1.39548	0.41525	0.782563	["ENSG00000167965","ENSG00000204673"]	["AKT1S1","MLST8"]
CH000000699	IL-1beta ---> Elk-1	3	20	2.3258	0.416258	0.782563	["ENSG00000100324","ENSG00000126767","ENSG00000130985"]	["ELK1","TAB1","UBA1"]
CH000000719	AhR pathway	3	20	2.3258	0.416258	0.782563	["ENSG00000110711","ENSG00000196498","ENSG00000204389"]	["AIP","HSPA1A (ENSG00000204389)","NCOR2"]
CH000004723	SDF-1 ---> G-protein	3	20	2.3258	0.416258	0.782563	["ENSG00000069966","ENSG00000172354","ENSG00000197122"]	["GNB2","GNB5","SRC"]
CH000000662	RhoA ---> stress fiber formation	4	29	3.37241	0.440961	0.782563	["ENSG00000114993","ENSG00000123143","ENSG00000141522","ENSG00000175866"]	["ARHGDIA","BAIAP2","PKN1","RTKN"]
CH000000749	RhoA pathway 5	4	29	3.37241	0.440961	0.782563	["ENSG00000114993","ENSG00000123143","ENSG00000141522","ENSG00000175866"]	["ARHGDIA","BAIAP2","PKN1","RTKN"]
CH000004283	ER-alpha ---CHIP---> 26S proteasome	4	29	3.37241	0.440961	0.782563	["ENSG00000103266","ENSG00000108344","ENSG00000130985","ENSG00000204389"]	["HSPA1A (ENSG00000204389)","PSMD3","STUB1","UBA1"]
CH000000693	G2/M phase (cyclin A:Cdk1)	3	21	2.44209	0.448709	0.782563	["ENSG00000101224","ENSG00000101412","ENSG00000127564"]	["CDC25B","E2F1","PKMYT1"]
CH000000790	IL-8 ---> IP3	3	21	2.44209	0.448709	0.782563	["ENSG00000069966","ENSG00000096433","ENSG00000172354"]	["GNB2","GNB5","ITPR3"]
CH000000753	B-cell antigen receptor pathway	8	63	7.32627	0.453169	0.782563	["ENSG00000078061","ENSG00000096433","ENSG00000102882","ENSG00000106683","ENSG00000110651","ENSG00000126934","ENSG00000137764","ENSG00000173327"]	["ARAF","CD81","ITPR3","LIMK1","MAP2K2","MAP2K5","MAP3K11","MAPK3"]
CH000004648	angiotensin	10	80	9.3032	0.455338	0.782563	["ENSG00000002330","ENSG00000067606","ENSG00000069966","ENSG00000096433","ENSG00000101412","ENSG00000102882","ENSG00000117676","ENSG00000141480","ENSG00000163932","ENSG00000172354"]	["ARRB2","BAD","E2F1","GNB2","GNB5","ITPR3","MAPK3","PRKCD","PRKCZ","RPS6KA1 (ENSG00000117676)"]
CH000000801	NT ---> Gq	2	13	1.51177	0.457047	0.782563	["ENSG00000069966","ENSG00000172354"]	["GNB2","GNB5"]
CH000003748	3-phosphatidylethanolamine ---> glycero-3-phosphoethanolamine, fatty acid	2	13	1.51177	0.457047	0.782563	["ENSG00000032444","ENSG00000105223"]	["PLD3","PNPLA6"]
CH000003753	lecithin ---> L-1-glycero-3-phoshocholine, fatty acid	2	13	1.51177	0.457047	0.782563	["ENSG00000032444","ENSG00000105223"]	["PLD3","PNPLA6"]
CH000003754	degradation of glycerophospholipids	2	13	1.51177	0.457047	0.782563	["ENSG00000032444","ENSG00000105223"]	["PLD3","PNPLA6"]
CH000003701	interconversion and degradation of pyrimidine nucleotides and bases	5	38	4.41902	0.4579	0.782563	["ENSG00000103024","ENSG00000103202","ENSG00000129187","ENSG00000167900","ENSG00000197586"]	["DCTD","ENTPD6","NME3","NME4","TK1"]
CH000004457	metabolism of DAG	5	38	4.41902	0.4579	0.782563	["ENSG00000067113","ENSG00000105223","ENSG00000129951","ENSG00000141934","ENSG00000185000"]	["DGAT1 (ENSG00000185000)","PLD3","PLPP1","PLPP2","PLPPR3 (ENSG00000129951)"]
CH000000002	Cdc42 ---/ cofilin	1	5	0.58145	0.461384	0.782563	["ENSG00000106683"]	["LIMK1"]
CH000000072	cyclin D3(h):Cdk4(h) ---> p107(h){p}	1	5	0.58145	0.461384	0.782563	["ENSG00000112576"]	["CCND3"]
CH000000289	MKK6 ---p38---> p53	1	5	0.58145	0.461384	0.782563	["ENSG00000141510"]	["TP53"]
CH000000292	CKII, SUPT16H, SSRP1 complex formation	1	5	0.58145	0.461384	0.782563	["ENSG00000204435"]	["CSNK2B (ENSG00000204435)"]
CH000000331	protein tyrosine kinases ---> alpha-catenin1:beta-catenin:E-cadherin:plakoglobin:p120CAS	1	5	0.58145	0.461384	0.782563	["ENSG00000173801"]	["JUP"]
CH000000396	HATs ---> STAT6:H3R	1	5	0.58145	0.461384	0.782563	["ENSG00000166888"]	["STAT6"]
CH000000480	MEKK2, MEKK3 ---> p38, JNK1	1	5	0.58145	0.461384	0.782563	["ENSG00000076984"]	["MAP2K7"]
CH000000627	EGF ---> PAK1	1	5	0.58145	0.461384	0.782563	["ENSG00000115325"]	["DOK1"]
CH000000647	PDGF A ---> Crk	1	5	0.58145	0.461384	0.782563	["ENSG00000050820"]	["BCAR1 (ENSG00000050820)"]
CH000000653	insulin ---Jak1---> IRS-1, IRS-2	1	5	0.58145	0.461384	0.782563	["ENSG00000184557"]	["SOCS3"]
CH000000707	DNA-PK ---> p53	1	5	0.58145	0.461384	0.782563	["ENSG00000141510"]	["TP53"]
CH000000709	ATM ---/ Cdc25	1	5	0.58145	0.461384	0.782563	["ENSG00000101224"]	["CDC25B"]
CH000000727	EGF ---> PAK1	1	5	0.58145	0.461384	0.782563	["ENSG00000115325"]	["DOK1"]
CH000000729	EGF ---> STAT3	1	5	0.58145	0.461384	0.782563	["ENSG00000197122"]	["SRC"]
CH000000813	ASK1 ---DUSP19---> c-Jun	1	5	0.58145	0.461384	0.782563	["ENSG00000076984"]	["MAP2K7"]
CH000000861	beta-arrestin2 ---> c-Jun	1	5	0.58145	0.461384	0.782563	["ENSG00000141480"]	["ARRB2"]
CH000000871	EGF ---> PLD2	1	5	0.58145	0.461384	0.782563	["ENSG00000136854"]	["STXBP1"]
CH000000872	Unc18-1 ---/ PLD2	1	5	0.58145	0.461384	0.782563	["ENSG00000136854"]	["STXBP1"]
CH000000876	Src ---> Rap2B	1	5	0.58145	0.461384	0.782563	["ENSG00000197122"]	["SRC"]
CH000000880	Caspase-3 ---/ Bcl-2	1	5	0.58145	0.461384	0.782563	["ENSG00000127824"]	["TUBA4A"]
CH000000887	Fas ---> Caspase-8	1	5	0.58145	0.461384	0.782563	["ENSG00000168040"]	["FADD"]
CH000000899	Apo2L ---Caspase-8---> Caspase-3	1	5	0.58145	0.461384	0.782563	["ENSG00000168040"]	["FADD"]
CH000000916	Apo2L ---> Caspase-7	1	5	0.58145	0.461384	0.782563	["ENSG00000168040"]	["FADD"]
CH000000917	Apo2L ---Caspase-10---> Caspase-3	1	5	0.58145	0.461384	0.782563	["ENSG00000168040"]	["FADD"]
CH000000951	CKII ---> alpha-synuclein	1	5	0.58145	0.461384	0.782563	["ENSG00000204435"]	["CSNK2B (ENSG00000204435)"]
CH000000980	ERK ---> N-WASP	1	5	0.58145	0.461384	0.782563	["ENSG00000102882"]	["MAPK3"]
CH000000991	CKII ---> AP-1	1	5	0.58145	0.461384	0.782563	["ENSG00000204435"]	["CSNK2B (ENSG00000204435)"]
CH000000993	YY1 ---/ p300	1	5	0.58145	0.461384	0.782563	["ENSG00000141510"]	["TP53"]
CH000003418	DISC ---> c-FLIP-L ---> Caspase-10	1	5	0.58145	0.461384	0.782563	["ENSG00000168040"]	["FADD"]
CH000003419	DISC ---> c-FLIP-L ---> Caspase-8	1	5	0.58145	0.461384	0.782563	["ENSG00000168040"]	["FADD"]
CH000003565	Plk1 ---> Bub1	1	5	0.58145	0.461384	0.782563	["ENSG00000166851"]	["PLK1"]
CH000003572	fatty acid synthesis	1	5	0.58145	0.461384	0.782563	["ENSG00000169710"]	["FASN"]
CH000003611	fumarate ---> oxoglutarate, L-aspartate	1	5	0.58145	0.461384	0.782563	["ENSG00000146701"]	["MDH2"]
CH000003635	glycerol ---> glyceraldehyde-3-phosphate	1	5	0.58145	0.461384	0.782563	["ENSG00000111669"]	["TPI1"]
CH000003647	D-ribulose 5-phosphate ---> D-xylulose-5-phosphate	1	5	0.58145	0.461384	0.782563	["ENSG00000163931"]	["TKT"]
CH000003777	glucose-1-p ---> D-glucuronate	1	5	0.58145	0.461384	0.782563	["ENSG00000079739"]	["PGM1"]
CH000003843	PGH2 ---> prostaglandin F2-alpha	1	5	0.58145	0.461384	0.782563	["ENSG00000148334"]	["PTGES2"]
CH000003850	Ins(1,3,4)P3 ---> myo-inositol 1-phosphate ---> inositol	1	5	0.58145	0.461384	0.782563	["ENSG00000141401"]	["IMPA2"]
CH000003881	Pin1 ---> APP	1	5	0.58145	0.461384	0.782563	["ENSG00000127445"]	["PIN1"]
CH000003888	EGF ---> Src	1	5	0.58145	0.461384	0.782563	["ENSG00000197122"]	["SRC"]
CH000004175	E1 ---UbcH7---> parkin	1	5	0.58145	0.461384	0.782563	["ENSG00000130985"]	["UBA1"]
CH000004178	E1 ---Ubc7---> parkin	1	5	0.58145	0.461384	0.782563	["ENSG00000130985"]	["UBA1"]
CH000004210	BDNF ---MSK1---> CREB1	1	5	0.58145	0.461384	0.782563	["ENSG00000102882"]	["MAPK3"]
CH000004285	lactosylceramide ---> GT1a, GT1alpha	1	5	0.58145	0.461384	0.782563	["ENSG00000157350"]	["ST3GAL2"]
CH000004323	NGF ---p75NTR ---SMase --->JNK	1	5	0.58145	0.461384	0.782563	["ENSG00000141510"]	["TP53"]
CH000004327	acetyl-CoA, malonyl-CoA ---> lignoceric acid	1	5	0.58145	0.461384	0.782563	["ENSG00000169710"]	["FASN"]
CH000004393	VDR phosphorylation	1	5	0.58145	0.461384	0.782563	["ENSG00000204435"]	["CSNK2B (ENSG00000204435)"]
CH000004435	biosynthesis of coenzyme Q10	1	5	0.58145	0.461384	0.782563	["ENSG00000167186"]	["COQ7"]
CH000004436	4-hydroxybenzoic acid ---> coenzyme Q10	1	5	0.58145	0.461384	0.782563	["ENSG00000167186"]	["COQ7"]
CH000004559	CKII ---/ CARD9	1	5	0.58145	0.461384	0.782563	["ENSG00000204435"]	["CSNK2B (ENSG00000204435)"]
CH000004584	tyrosine dephosphorylation of plakoglobin	1	5	0.58145	0.461384	0.782563	["ENSG00000173801"]	["JUP"]
CH000004660	TGFbeta1 ---> NOS3	1	5	0.58145	0.461384	0.782563	["ENSG00000140464"]	["PML"]
CH000004685	UV ---> ERK1, ERK2	1	5	0.58145	0.461384	0.782563	["ENSG00000102882"]	["MAPK3"]
CH000004700	15-Keto-PGE2 ---> TP63	1	5	0.58145	0.461384	0.782563	["ENSG00000140464"]	["PML"]
CH000004709	Tip60 ubiquitination	1	5	0.58145	0.461384	0.782563	["ENSG00000130985"]	["UBA1"]
CH000003693	cytidine 5'-phosphate ---> RNA-P-U	3	22	2.55838	0.480415	0.802568	["ENSG00000103024","ENSG00000103202","ENSG00000197586"]	["ENTPD6","NME3","NME4"]
CH000004367	metabolism of skin lipids (ceramide, cholesterol and phospholipids)	3	22	2.55838	0.480415	0.802568	["ENSG00000070610","ENSG00000090661","ENSG00000223802"]	["CERS1","CERS4","GBA2"]
CH000004392	mGluR receptor signaling	3	22	2.55838	0.480415	0.802568	["ENSG00000069966","ENSG00000096433","ENSG00000172354"]	["GNB2","GNB5","ITPR3"]
CH000004703	MCP-1 (/CCL2) network	3	22	2.55838	0.480415	0.802568	["ENSG00000069966","ENSG00000140464","ENSG00000172354"]	["GNB2","GNB5","PML"]
CH000004544	IRAK-1 ---MKK3---> TNF	2	14	1.62806	0.497072	0.802568	["ENSG00000034152","ENSG00000100324"]	["MAP2K3","TAB1"]
CH000004697	CCR2 signaling	2	14	1.62806	0.497072	0.802568	["ENSG00000069966","ENSG00000172354"]	["GNB2","GNB5"]
CH000000755	TLR4 pathway	7	57	6.62853	0.500813	0.802568	["ENSG00000099804","ENSG00000100324","ENSG00000102882","ENSG00000126456","ENSG00000130159","ENSG00000130985","ENSG00000173039"]	["CDC34","ECSIT","IRF3","MAPK3","RELA","TAB1","UBA1"]
CH000000757	RANKL pathway	3	23	2.67467	0.511242	0.802568	["ENSG00000100324","ENSG00000127191","ENSG00000197122"]	["SRC","TAB1","TRAF2"]
CH000004694	ErbB4 mediated signaling	3	23	2.67467	0.511242	0.802568	["ENSG00000117362","ENSG00000143801","ENSG00000205155"]	["APH1A","PSEN2","PSENEN"]
CH000000577	fMLP ---> superoxide	4	32	3.72128	0.520586	0.802568	["ENSG00000069966","ENSG00000102882","ENSG00000126934","ENSG00000172354"]	["GNB2","GNB5","MAP2K2","MAPK3"]
CH000004517	TLR9 pathway	4	32	3.72128	0.520586	0.802568	["ENSG00000034152","ENSG00000100324","ENSG00000130985","ENSG00000173039"]	["MAP2K3","RELA","TAB1","UBA1"]
CH000000029	angiotensin II ---> c-Jun	1	6	0.69774	0.524167	0.802568	["ENSG00000141480"]	["ARRB2"]
CH000000249	MTAIL1 ---> p53	1	6	0.69774	0.524167	0.802568	["ENSG00000141510"]	["TP53"]
CH000000250	MTA1L1:Mi2-BETA:HDAC1:RbAp48:mbd3 ---> p53	1	6	0.69774	0.524167	0.802568	["ENSG00000141510"]	["TP53"]
CH000000668	FasL ---> Caspase-3	1	6	0.69774	0.524167	0.802568	["ENSG00000168040"]	["FADD"]
CH000000680	activin A ---> Smad3	1	6	0.69774	0.524167	0.802568	["ENSG00000185359"]	["HGS"]
CH000000681	activin A ---> Smad2	1	6	0.69774	0.524167	0.802568	["ENSG00000185359"]	["HGS"]
CH000000701	p53 nuclear import	1	6	0.69774	0.524167	0.802568	["ENSG00000141510"]	["TP53"]
CH000000776	RANKL ---> JNK1	1	6	0.69774	0.524167	0.802568	["ENSG00000127191"]	["TRAF2"]
CH000000779	Csk, CD45 ---> Fyn	1	6	0.69774	0.524167	0.802568	["ENSG00000103653"]	["CSK"]
CH000000883	Fas ---> Caspase-2	1	6	0.69774	0.524167	0.802568	["ENSG00000168040"]	["FADD"]
CH000000895	Fas ---> Abl	1	6	0.69774	0.524167	0.802568	["ENSG00000168040"]	["FADD"]
CH000000958	E1 ---/ Septin5	1	6	0.69774	0.524167	0.802568	["ENSG00000130985"]	["UBA1"]
CH000000959	E1 ---/ synaptotagmin-11	1	6	0.69774	0.524167	0.802568	["ENSG00000130985"]	["UBA1"]
CH000000960	E1 ---parkin---/ synphilin-1	1	6	0.69774	0.524167	0.802568	["ENSG00000130985"]	["UBA1"]
CH000000962	E1 ---dorfin---/ synphilin-1	1	6	0.69774	0.524167	0.802568	["ENSG00000130985"]	["UBA1"]
CH000003564	Bub1 ---> APC7	1	6	0.69774	0.524167	0.802568	["ENSG00000117399"]	["CDC20"]
CH000003644	ethanolamine ---> 3-phosphatidylethanolamine	1	6	0.69774	0.524167	0.802568	["ENSG00000143845"]	["ETNK2"]
CH000003676	aspartate and asparagine metabolism	1	6	0.69774	0.524167	0.802568	["ENSG00000084774"]	["CAD"]
CH000003839	sialogangliotetraosyl ceramide ---> lactosylceramide	1	6	0.69774	0.524167	0.802568	["ENSG00000162139"]	["NEU3"]
CH000003852	Ins(1,3,4)P3 ---> inositol 3-phosphate ---> inositol	1	6	0.69774	0.524167	0.802568	["ENSG00000141401"]	["IMPA2"]
CH000003878	SOCS-1 ---> p50:RelA-p65	1	6	0.69774	0.524167	0.802568	["ENSG00000173039"]	["RELA"]
CH000004176	UbcH7 ---parkin---> Eps15	1	6	0.69774	0.524167	0.802568	["ENSG00000130985"]	["UBA1"]
CH000004288	ceramide ---> GD1c, GD1alpha	1	6	0.69774	0.524167	0.802568	["ENSG00000157350"]	["ST3GAL2"]
CH000004324	fatty acid chain elongation	1	6	0.69774	0.524167	0.802568	["ENSG00000169710"]	["FASN"]
CH000004325	acyl-CoA, malonyl-CoA ---> fatty acyl-CoA	1	6	0.69774	0.524167	0.802568	["ENSG00000169710"]	["FASN"]
CH000004345	kainate receptor signaling	1	6	0.69774	0.524167	0.802568	["ENSG00000173327"]	["MAP3K11"]
CH000004441	DAG ---> lysophosphatidylethanolamine	1	6	0.69774	0.524167	0.802568	["ENSG00000174915"]	["PTDSS2 (ENSG00000174915)"]
CH000004563	TLR8 ---Btk---> NF-kappaB	1	6	0.69774	0.524167	0.802568	["ENSG00000173039"]	["RELA"]
CH000004564	TLR9 ---Btk--->NF-kappaB	1	6	0.69774	0.524167	0.802568	["ENSG00000173039"]	["RELA"]
CH000004592	N-cadherin:plakoglobin, homophilic ligation	1	6	0.69774	0.524167	0.802568	["ENSG00000173801"]	["JUP"]
CH000004630	TGFbeta1 ---> Smad2/3	1	6	0.69774	0.524167	0.802568	["ENSG00000140464"]	["PML"]
CH000004638	AMPK(alpha2/beta2/gamma1) activation	1	6	0.69774	0.524167	0.802568	["ENSG00000118046"]	["STK11"]
CH000004653	AT2 receptor ---/ ERK1/2	1	6	0.69774	0.524167	0.802568	["ENSG00000102882"]	["MAPK3"]
CH000004667	MEK ---> EZR	1	6	0.69774	0.524167	0.802568	["ENSG00000102882"]	["MAPK3"]
CH000004678	FIH-1 ---/ NICD1	1	6	0.69774	0.524167	0.802568	["ENSG00000148400"]	["NOTCH1"]
CH000004701	TGFbeta1 ---> MCP-1(CCL2)	1	6	0.69774	0.524167	0.802568	["ENSG00000140464"]	["PML"]
CH000004704	MEKK2/3 ---> MMP10	1	6	0.69774	0.524167	0.802568	["ENSG00000137764"]	["MAP2K5"]
CH000004710	Elk-1 ubiquitination	1	6	0.69774	0.524167	0.802568	["ENSG00000126767"]	["ELK1"]
CH000004728	MMB	1	6	0.69774	0.524167	0.802568	["ENSG00000101057"]	["MYBL2"]
CH000000014	fMLP ---> DAG, IP3	2	15	1.74435	0.53517	0.80885	["ENSG00000069966","ENSG00000172354"]	["GNB2","GNB5"]
CH000000677	15d-PGJ2 ---> PPAR-gamma	2	15	1.74435	0.53517	0.80885	["ENSG00000171222","ENSG00000184634"]	["MED12","SCAND1"]
CH000000800	NT ---> Gi	2	15	1.74435	0.53517	0.80885	["ENSG00000069966","ENSG00000172354"]	["GNB2","GNB5"]
CH000000823	dsRNA ---> IKK-alpha:IKK-beta{p}:IKK-gamma	2	15	1.74435	0.53517	0.80885	["ENSG00000100324","ENSG00000130985"]	["TAB1","UBA1"]
CH000004252	NGF ---TrkA---> Elk-1	2	15	1.74435	0.53517	0.80885	["ENSG00000102882","ENSG00000126767"]	["ELK1","MAPK3"]
CH000000822	c-Jun degradation	3	24	2.79096	0.541085	0.80885	["ENSG00000099804","ENSG00000108344","ENSG00000130985"]	["CDC34","PSMD3","UBA1"]
CH000001001	Plk1 activation and substrates	3	24	2.79096	0.541085	0.80885	["ENSG00000127564","ENSG00000131462","ENSG00000166851"]	["PKMYT1","PLK1","TUBG1"]
CH000004506	IL_5 pathway	3	25	2.90725	0.569858	0.80885	["ENSG00000079805","ENSG00000102882","ENSG00000109103"]	["DNM2","MAPK3","UNC119"]
CH000000015	C5a ---> DAG, IP3	2	16	1.86064	0.571248	0.80885	["ENSG00000069966","ENSG00000172354"]	["GNB2","GNB5"]
CH000000576	AKT, MAPKAPK2 ---/ tuberin	2	16	1.86064	0.571248	0.80885	["ENSG00000034152","ENSG00000103197"]	["MAP2K3","TSC2"]
CH000000788	GROalpha ---/ AC5	2	16	1.86064	0.571248	0.80885	["ENSG00000069966","ENSG00000172354"]	["GNB2","GNB5"]
CH000000796	NT ---> arachidonic acid	2	16	1.86064	0.571248	0.80885	["ENSG00000069966","ENSG00000172354"]	["GNB2","GNB5"]
CH000003671	glutamate metabolism	2	16	1.86064	0.571248	0.80885	["ENSG00000159423","ENSG00000183010"]	["ALDH4A1","PYCR1"]
CH000003782	L-tryptophan ---> NAD+, NADPH	2	16	1.86064	0.571248	0.80885	["ENSG00000008130","ENSG00000172890"]	["NADK","NADSYN1"]
CH000003783	biosynthesis and degradation of nicotinamide,NAD+,NADP+	2	16	1.86064	0.571248	0.80885	["ENSG00000008130","ENSG00000172890"]	["NADK","NADSYN1"]
CH000004335	PtdIns ---> PIP2	2	16	1.86064	0.571248	0.80885	["ENSG00000143393","ENSG00000204084"]	["INPP5B","PI4KB"]
CH000004493	IFNalpha ---> ISGF3	2	16	1.86064	0.571248	0.80885	["ENSG00000105397","ENSG00000163932"]	["PRKCD","TYK2"]
CH000004654	AT2 ---> PIK3R1	2	16	1.86064	0.571248	0.80885	["ENSG00000069966","ENSG00000172354"]	["GNB2","GNB5"]
CH000000562	fibrinogen ---> Syk	1	7	0.81403	0.579659	0.80885	["ENSG00000103653"]	["CSK"]
CH000000579	IL-10 ---> STAT1alpha, STAT3	1	7	0.81403	0.579659	0.80885	["ENSG00000105397"]	["TYK2"]
CH000000584	IL-22 ---> STAT1alpha, STAT3	1	7	0.81403	0.579659	0.80885	["ENSG00000105397"]	["TYK2"]
CH000000606	CD19 ---> PLCgamma2	1	7	0.81403	0.579659	0.80885	["ENSG00000110651"]	["CD81"]
CH000000622	EGF ---> DAG, IP3	1	7	0.81403	0.579659	0.80885	["ENSG00000096433"]	["ITPR3"]
CH000000761	IL-10 pathway	1	7	0.81403	0.579659	0.80885	["ENSG00000105397"]	["TYK2"]
CH000000762	IL-22 pathway	1	7	0.81403	0.579659	0.80885	["ENSG00000105397"]	["TYK2"]
CH000000785	EDAR ---> TRAF2	1	7	0.81403	0.579659	0.80885	["ENSG00000127191"]	["TRAF2"]
CH000000877	Src ---> Rac1	1	7	0.81403	0.579659	0.80885	["ENSG00000197122"]	["SRC"]
CH000000878	Src ---/ RhoA	1	7	0.81403	0.579659	0.80885	["ENSG00000197122"]	["SRC"]
CH000000910	Fas ---/ PRK2	1	7	0.81403	0.579659	0.80885	["ENSG00000168040"]	["FADD"]
CH000000920	Fas ---/ Cdc42	1	7	0.81403	0.579659	0.80885	["ENSG00000168040"]	["FADD"]
CH000003574	SIRT1 ---/ AR	1	7	0.81403	0.579659	0.80885	["ENSG00000196498"]	["NCOR2"]
CH000003582	CENP-E ---> BubR1	1	7	0.81403	0.579659	0.80885	["ENSG00000002822"]	["MAD1L1"]
CH000003618	[R]-pantothenate ---> CoA	1	7	0.81403	0.579659	0.80885	["ENSG00000068120"]	["COASY"]
CH000003655	biosynthesis of pantothenate and coenzyme A	1	7	0.81403	0.579659	0.80885	["ENSG00000068120"]	["COASY"]
CH000003672	serine ---> 3-phosphoglycerate	1	7	0.81403	0.579659	0.80885	["ENSG00000171314"]	["PGAM1"]
CH000003681	H2SO4 ---> AMP	1	7	0.81403	0.579659	0.80885	["ENSG00000196502"]	["SULT1A1"]
CH000003722	L-methionine ---> dimethylglycine	1	7	0.81403	0.579659	0.80885	["ENSG00000101444"]	["AHCY"]
CH000003776	dGDP ---> guanine	1	7	0.81403	0.579659	0.80885	["ENSG00000143774"]	["GUK1"]
CH000003814	pantothenate ---> CoA	1	7	0.81403	0.579659	0.80885	["ENSG00000068120"]	["COASY"]
CH000003815	biosynthesis of pantothenate, coenzyme A and holo-acyl carrier protein	1	7	0.81403	0.579659	0.80885	["ENSG00000068120"]	["COASY"]
CH000003851	IP3 ---> inositol	1	7	0.81403	0.579659	0.80885	["ENSG00000141401"]	["IMPA2"]
CH000004179	NGF ---TRAF6---> trkA K63-poly-ubiquitinated	1	7	0.81403	0.579659	0.80885	["ENSG00000130985"]	["UBA1"]
CH000004247	ER-alpha (NR3A1) ubiquitination	1	7	0.81403	0.579659	0.80885	["ENSG00000130985"]	["UBA1"]
CH000004338	PtdIns(4)P ---> PtdIns(4)P, p	1	7	0.81403	0.579659	0.80885	["ENSG00000204084"]	["INPP5B"]
CH000004429	ceramide ---> palmitaldehyde, O-phosphoethanolamine	1	7	0.81403	0.579659	0.80885	["ENSG00000063176"]	["SPHK2"]
CH000004479	RIP deubiquitination	1	7	0.81403	0.579659	0.80885	["ENSG00000127191"]	["TRAF2"]
CH000004556	IL-16	1	7	0.81403	0.579659	0.80885	["ENSG00000182866"]	["LCK"]
CH000004567	parkin ---> IKK-gamma	1	7	0.81403	0.579659	0.80885	["ENSG00000130985"]	["UBA1"]
CH000004624	MIC2-isoform2 ---JNK, JunD---> MMP9	1	7	0.81403	0.579659	0.80885	["ENSG00000197122"]	["SRC"]
CH000004639	AMPK ---> ACCalpha	1	7	0.81403	0.579659	0.80885	["ENSG00000118046"]	["STK11"]
CH000000838	p53 degradation	3	26	3.02354	0.597497	0.828791	["ENSG00000108344","ENSG00000130985","ENSG00000141510"]	["PSMD3","TP53","UBA1"]
CH000000985	E1 ---PIRH2---/ p53	3	26	3.02354	0.597497	0.828791	["ENSG00000108344","ENSG00000130985","ENSG00000141510"]	["PSMD3","TP53","UBA1"]
CH000000572	LPS ---> p38	2	17	1.97693	0.605259	0.828791	["ENSG00000100324","ENSG00000130985"]	["TAB1","UBA1"]
CH000000787	IL-8 ---/ AC5	2	17	1.97693	0.605259	0.828791	["ENSG00000069966","ENSG00000172354"]	["GNB2","GNB5"]
CH000004258	NR2A:NR2B ---Pyk2---MEK2---> ERK2	2	17	1.97693	0.605259	0.828791	["ENSG00000126934","ENSG00000197122"]	["MAP2K2","SRC"]
CH000004274	NR2A:NR2B ---Pyk2---MEK1---> ERK1	2	17	1.97693	0.605259	0.828791	["ENSG00000102882","ENSG00000197122"]	["MAPK3","SRC"]
CH000004512	IL-5 ---Lyn--->ERK1	2	17	1.97693	0.605259	0.828791	["ENSG00000102882","ENSG00000109103"]	["MAPK3","UNC119"]
CH000000879	Caspase network	9	81	9.41949	0.612617	0.828791	["ENSG00000030110","ENSG00000087088","ENSG00000108344","ENSG00000111057","ENSG00000127824","ENSG00000130985","ENSG00000141510","ENSG00000163932","ENSG00000168040"]	["BAK1","BAX","FADD","KRT18","PRKCD","PSMD3","TP53","TUBA4A","UBA1"]
CH000000918	cyclosome regulation	6	54	6.27966	0.61272	0.828791	["ENSG00000108344","ENSG00000116670","ENSG00000117399","ENSG00000130985","ENSG00000164611","ENSG00000166851"]	["CDC20","MAD2L2","PLK1","PSMD3","PTTG1","UBA1"]
CH000000754	fMLP pathway	5	45	5.23305	0.614321	0.828791	["ENSG00000069966","ENSG00000096433","ENSG00000102882","ENSG00000126934","ENSG00000172354"]	["GNB2","GNB5","ITPR3","MAP2K2","MAPK3"]
CH000000578	fMLP ---> NF-AT2	3	27	3.13983	0.623957	0.828791	["ENSG00000069966","ENSG00000096433","ENSG00000172354"]	["GNB2","GNB5","ITPR3"]
CH000000712	PPAR pathway	3	27	3.13983	0.623957	0.828791	["ENSG00000171222","ENSG00000184634","ENSG00000204231"]	["MED12","RXRB (ENSG00000204231)","SCAND1"]
CH000004427	sphingolipid metabolism	3	27	3.13983	0.623957	0.828791	["ENSG00000063176","ENSG00000090661","ENSG00000223802"]	["CERS1","CERS4","SPHK2"]
CH000000017	arachidonic acid ---> NADPH oxidase	1	8	0.93032	0.628702	0.828791	["ENSG00000169750"]	["RAC3"]
CH000000038	insulin ---> ERK	1	8	0.93032	0.628702	0.828791	["ENSG00000078061"]	["ARAF"]
CH000000047	insulin ---> GLUT4	1	8	0.93032	0.628702	0.828791	["ENSG00000137312"]	["FLOT1 (ENSG00000137312)"]
CH000000485	TNF-alpha ---> c-Jun	1	8	0.93032	0.628702	0.828791	["ENSG00000127191"]	["TRAF2"]
CH000000696	BMP2 ---> p38alpha	1	8	0.93032	0.628702	0.828791	["ENSG00000100324"]	["TAB1"]
CH000000819	dsRNA ---> IRF-7:IRF-3:CBP:p300	1	8	0.93032	0.628702	0.828791	["ENSG00000126456"]	["IRF3"]
CH000000826	TAK1 ---> ATF-2	1	8	0.93032	0.628702	0.828791	["ENSG00000100324"]	["TAB1"]
CH000000922	Nod1 ---> Caspase-9	1	8	0.93032	0.628702	0.828791	["ENSG00000130985"]	["UBA1"]
CH000000957	E1 ---/ beta-tubulin	1	8	0.93032	0.628702	0.828791	["ENSG00000130985"]	["UBA1"]
CH000000961	E1 ---/ ErbB3	1	8	0.93032	0.628702	0.828791	["ENSG00000130985"]	["UBA1"]
CH000000963	E1 ---Siah-1---/ synphilin-1	1	8	0.93032	0.628702	0.828791	["ENSG00000130985"]	["UBA1"]
CH000003769	adenine, alpha-D-5-P-ribosyl-PP ---> inosine, ammonia	1	8	0.93032	0.628702	0.828791	["ENSG00000198931"]	["APRT"]
CH000003817	L-ornithine ---> succinate	1	8	0.93032	0.628702	0.828791	["ENSG00000116649"]	["SRM"]
CH000003818	polyamine metabolism	1	8	0.93032	0.628702	0.828791	["ENSG00000116649"]	["SRM"]
CH000003842	arachidonic acid ---> PGJ2, 15d-PGJ2	1	8	0.93032	0.628702	0.828791	["ENSG00000148334"]	["PTGES2"]
CH000004277	NGF --TrkA ---> JNK	1	8	0.93032	0.628702	0.828791	["ENSG00000163932"]	["PRKCD"]
CH000004317	platelet-activating factor ---> fatty aldehyde	1	8	0.93032	0.628702	0.828791	["ENSG00000079462"]	["PAFAH1B3"]
CH000004351	TNF-alpha ---FADD---> caspase-3	1	8	0.93032	0.628702	0.828791	["ENSG00000168040"]	["FADD"]
CH000004511	IL-5 ---Lyn, STAT1alpha--->ICAM1	1	8	0.93032	0.628702	0.828791	["ENSG00000109103"]	["UNC119"]
CH000004583	homophilic ligation of E-cadherin	1	8	0.93032	0.628702	0.828791	["ENSG00000204435"]	["CSNK2B (ENSG00000204435)"]
CH000003553	Aurora-B cell cycle regulation	6	55	6.39595	0.631242	0.830748	["ENSG00000002822","ENSG00000108344","ENSG00000117399","ENSG00000130985","ENSG00000166851","ENSG00000178999"]	["AURKB","CDC20","MAD1L1","PLK1","PSMD3","UBA1"]
CH000000821	TBK1:TRIF:IKK-i ---> p50:RelA	2	18	2.09322	0.637193	0.831627	["ENSG00000099804","ENSG00000173039"]	["CDC34","RELA"]
CH000004164	EGF ---> HMGCR	2	18	2.09322	0.637193	0.831627	["ENSG00000118046","ENSG00000197122"]	["SRC","STK11"]
CH000004248	sphinganine ---> ceramide-1,2,5	2	18	2.09322	0.637193	0.831627	["ENSG00000090661","ENSG00000223802"]	["CERS1","CERS4"]
CH000004504	IFNalpha ---CD45---> STAT	2	18	2.09322	0.637193	0.831627	["ENSG00000105397","ENSG00000182866"]	["LCK","TYK2"]
CH000004636	leptin ---PI3K, AKT-1---> AMP	2	18	2.09322	0.637193	0.831627	["ENSG00000167965","ENSG00000178188"]	["MLST8","SH2B1"]
CH000004437	lymphotoxin B receptor signaling	4	37	4.30273	0.639851	0.833079	["ENSG00000104856","ENSG00000108344","ENSG00000127191","ENSG00000130985"]	["PSMD3","RELB","TRAF2","UBA1"]
CH000000947	parkin associated pathways	7	66	7.67514	0.66254	0.833079	["ENSG00000103266","ENSG00000108344","ENSG00000127824","ENSG00000130985","ENSG00000181788","ENSG00000204389","ENSG00000204435"]	["CSNK2B (ENSG00000204435)","HSPA1A (ENSG00000204389)","PSMD3","SIAH2","STUB1","TUBA4A","UBA1"]
CH000000609	BCR ---> cytoskeletal reorganization	2	19	2.20951	0.667072	0.833079	["ENSG00000106683","ENSG00000110651"]	["CD81","LIMK1"]
CH000000789	IL-8 ---> ERK2	2	19	2.20951	0.667072	0.833079	["ENSG00000069966","ENSG00000172354"]	["GNB2","GNB5"]
CH000003691	tyrosine metabolism	2	19	2.20951	0.667072	0.833079	["ENSG00000100577","ENSG00000103876"]	["FAH","GSTZ1"]
CH000003704	metabolism of branched chain amino acids	2	19	2.20951	0.667072	0.833079	["ENSG00000105953","ENSG00000117305"]	["HMGCL","OGDH"]
CH000004192	NRG ---> ERK	2	19	2.20951	0.667072	0.833079	["ENSG00000102882","ENSG00000126767"]	["ELK1","MAPK3"]
CH000004298	plasmenylcholine biosynthesis	2	19	2.20951	0.667072	0.833079	["ENSG00000032444","ENSG00000067113"]	["PLPP1","PNPLA6"]
CH000004471	IFNgamma signaling	2	19	2.20951	0.667072	0.833079	["ENSG00000163932","ENSG00000204389"]	["HSPA1A (ENSG00000204389)","PRKCD"]
CH000004538	AMPK ---14-3-3---/ mTOR	2	19	2.20951	0.667072	0.833079	["ENSG00000167965","ENSG00000204673"]	["AKT1S1","MLST8"]
CH000000050	insulin ---> alphaENaC	1	9	1.04661	0.672043	0.833079	["ENSG00000111319"]	["SCNN1A"]
CH000000455	CaM ---/ dynamin-1	1	9	1.04661	0.672043	0.833079	["ENSG00000106976"]	["DNM1"]
CH000000500	CaMKII-alpha ---> Rac1	1	9	1.04661	0.672043	0.833079	["ENSG00000172531"]	["PPP1CA"]
CH000000616	Rac1 ---> c-Jun, Elk-1	1	9	1.04661	0.672043	0.833079	["ENSG00000126767"]	["ELK1"]
CH000000658	PDK1 ---> 4E-BP1, p70S6K1	1	9	1.04661	0.672043	0.833079	["ENSG00000187840"]	["EIF4EBP1"]
CH000000718	HIF-1alpha ---/ AhR	1	9	1.04661	0.672043	0.833079	["ENSG00000110711"]	["AIP"]
CH000000954	E1 ---/ cyclin E	1	9	1.04661	0.672043	0.833079	["ENSG00000130985"]	["UBA1"]
CH000003605	CO2, H2O ---> spermine	1	9	1.04661	0.672043	0.833079	["ENSG00000116649"]	["SRM"]
CH000003683	sulfur metabolism	1	9	1.04661	0.672043	0.833079	["ENSG00000196502"]	["SULT1A1"]
CH000003685	L-valine ---> 3-amino-isobutyrate	1	9	1.04661	0.672043	0.833079	["ENSG00000105953"]	["OGDH"]
CH000003800	choline ---> glycine	1	9	1.04661	0.672043	0.833079	["ENSG00000179761"]	["PIPOX"]
CH000003801	metabolism of choline, betaine and sarcosine	1	9	1.04661	0.672043	0.833079	["ENSG00000179761"]	["PIPOX"]
CH000003849	IP3 ---> myo-inositol 1,3,4,5,6-pentakisphosphate	1	9	1.04661	0.672043	0.833079	["ENSG00000100605"]	["ITPK1 (ENSG00000100605)"]
CH000004259	arachidonic acid ---> trioxilin A3	1	9	1.04661	0.672043	0.833079	["ENSG00000211445"]	["GPX3"]
CH000004326	biosynthesis of saturated and n - 9 series of MUFA and PUFA	1	9	1.04661	0.672043	0.833079	["ENSG00000169710"]	["FASN"]
CH000004480	TRAF2 deubiquitination	1	9	1.04661	0.672043	0.833079	["ENSG00000127191"]	["TRAF2"]
CH000004494	IFNalpha, IFNbeta ---> STAT3	1	9	1.04661	0.672043	0.833079	["ENSG00000105397"]	["TYK2"]
CH000004558	mannan, Dectin2	1	9	1.04661	0.672043	0.833079	["ENSG00000173039"]	["RELA"]
CH000004573	LPS ---Rac1, ERK---> IL-1RA	1	9	1.04661	0.672043	0.833079	["ENSG00000102882"]	["MAPK3"]
CH000004602	TAZ dephosphorylation	1	9	1.04661	0.672043	0.833079	["ENSG00000172531"]	["PPP1CA"]
CH000004651	AT1A ---beta-arrestin2---> EIF-4E	1	9	1.04661	0.672043	0.833079	["ENSG00000141480"]	["ARRB2"]
CH000000771	Fas pathway	3	29	3.37241	0.673238	0.833079	["ENSG00000030110","ENSG00000087088","ENSG00000168040"]	["BAK1","BAX","FADD"]
CH000003855	metabolism of inositol phosphates and release of Ca++ from intracellular stores	3	29	3.37241	0.673238	0.833079	["ENSG00000100605","ENSG00000141401","ENSG00000143393"]	["IMPA2","ITPK1 (ENSG00000100605)","PI4KB"]
CH000000919	cyclosome regulatory network	6	58	6.74482	0.683615	0.844591	["ENSG00000108344","ENSG00000116670","ENSG00000117399","ENSG00000130985","ENSG00000164611","ENSG00000166851"]	["CDC20","MAD2L2","PLK1","PSMD3","PTTG1","UBA1"]
CH000004526	autophagy	5	49	5.69821	0.690887	0.848316	["ENSG00000103197","ENSG00000130766","ENSG00000130985","ENSG00000167965","ENSG00000204673"]	["AKT1S1","MLST8","SESN2 (ENSG00000130766)","TSC2","UBA1"]
CH000000605	BCR ---> NF-AT	2	20	2.3258	0.69494	0.848316	["ENSG00000096433","ENSG00000110651"]	["CD81","ITPR3"]
CH000003887	Usp44 ---> Cdc20	2	20	2.3258	0.69494	0.848316	["ENSG00000117399","ENSG00000130985"]	["CDC20","UBA1"]
CH000004428	L-serine, palmityl-CoA ---> SM, ceramide-1-phosphate	2	20	2.3258	0.69494	0.848316	["ENSG00000090661","ENSG00000223802"]	["CERS1","CERS4"]
CH000004483	IL-3 ---Ras---> Bcl-2, MBP, CREB1	2	20	2.3258	0.69494	0.848316	["ENSG00000102882","ENSG00000117676"]	["MAPK3","RPS6KA1 (ENSG00000117676)"]
CH000004627	TGFbeta1 ---Tak1---> p38, JNK	2	20	2.3258	0.69494	0.848316	["ENSG00000034152","ENSG00000100324"]	["MAP2K3","TAB1"]
CH000000743	tuberin pathway	3	30	3.4887	0.69604	0.848316	["ENSG00000034152","ENSG00000103197","ENSG00000187840"]	["EIF4EBP1","MAP2K3","TSC2"]
CH000004149	Nrf2 pathway	3	30	3.4887	0.69604	0.848316	["ENSG00000102882","ENSG00000108344","ENSG00000198517"]	["MAFK","MAPK3","PSMD3"]
CH000000772	TNF-alpha pathway	10	96	11.1638	0.696433	0.848316	["ENSG00000030110","ENSG00000067606","ENSG00000076984","ENSG00000108344","ENSG00000127191","ENSG00000127445","ENSG00000136807","ENSG00000142453","ENSG00000168040","ENSG00000173039"]	["BAK1","CARM1","CDK9","FADD","MAP2K7","PIN1","PRKCZ","PSMD3","RELA","TRAF2"]
CH000000667	VHL ---> HIF-1alpha degradation	6	59	6.86111	0.699961	0.848316	["ENSG00000099804","ENSG00000108106","ENSG00000108344","ENSG00000130725","ENSG00000130985","ENSG00000204389"]	["CDC34","HSPA1A (ENSG00000204389)","PSMD3","UBA1","UBE2M","UBE2S"]
CH000000588	LAT ---> cofilin	1	10	1.1629	0.710344	0.848316	["ENSG00000106683"]	["LIMK1"]
CH000000592	MHC class I ---> LAT, SLP-76	1	10	1.1629	0.710344	0.848316	["ENSG00000182866"]	["LCK"]
CH000000597	IFNalpha, IFNbeta ---> STAT5	1	10	1.1629	0.710344	0.848316	["ENSG00000105397"]	["TYK2"]
CH000000720	AhRR ---/ AhR	1	10	1.1629	0.710344	0.848316	["ENSG00000110711"]	["AIP"]
CH000000775	RANKL ---> MITF	1	10	1.1629	0.710344	0.848316	["ENSG00000100324"]	["TAB1"]
CH000000783	EDA-A2 ---TRAF3---> p50:RelA-p65	1	10	1.1629	0.710344	0.848316	["ENSG00000173039"]	["RELA"]
CH000000784	EDA-A1 ---> p50:RelA-p65	1	10	1.1629	0.710344	0.848316	["ENSG00000173039"]	["RELA"]
CH000000901	Epo ---> ERK1	1	10	1.1629	0.710344	0.848316	["ENSG00000102882"]	["MAPK3"]
CH000003700	2'-deoxycytidine-5'-phosphate ---> deoxyuridine 5'-phosphate	1	10	1.1629	0.710344	0.848316	["ENSG00000167900"]	["TK1"]
CH000004455	caveolin-1 ---calmodulin1---> eNOS	1	10	1.1629	0.710344	0.848316	["ENSG00000079805"]	["DNM2"]
CH000004542	cPKC ---CARD9--->TRAF6	1	10	1.1629	0.710344	0.848316	["ENSG00000173039"]	["RELA"]
CH000004543	IRAK-1 ---MKK4---> TNF	1	10	1.1629	0.710344	0.848316	["ENSG00000100324"]	["TAB1"]
CH000000946	Plk1, Cdk1 ---/ Wee1	3	31	3.60499	0.717625	0.855713	["ENSG00000108344","ENSG00000130985","ENSG00000166851"]	["PLK1","PSMD3","UBA1"]
CH000000590	LAT ---> p50:RelA	2	21	2.44209	0.720859	0.85827	["ENSG00000099804","ENSG00000173039"]	["CDC34","RELA"]
CH000003848	metabolism of eicosanoids	3	32	3.72128	0.738008	0.86466	["ENSG00000124212","ENSG00000143819","ENSG00000148334"]	["EPHX1","PTGES2","PTGIS"]
CH000001002	Plk1 cell cycle regulation	5	52	6.04708	0.741125	0.86466	["ENSG00000108344","ENSG00000127564","ENSG00000130985","ENSG00000131462","ENSG00000166851"]	["PKMYT1","PLK1","PSMD3","TUBG1","UBA1"]
CH000004198	Metaphase to Anaphase transition	5	52	6.04708	0.741125	0.86466	["ENSG00000108344","ENSG00000117399","ENSG00000130985","ENSG00000164611","ENSG00000166851"]	["CDC20","PLK1","PSMD3","PTTG1","UBA1"]
CH000000611	BCR ---> p38	1	11	1.27919	0.744187	0.86466	["ENSG00000110651"]	["CD81"]
CH000000650	VEGF-A ---/ Caspase-9, Bad	1	11	1.27919	0.744187	0.86466	["ENSG00000002330"]	["BAD"]
CH000000825	dsRNA ---> c-Jun	1	11	1.27919	0.744187	0.86466	["ENSG00000130159"]	["ECSIT"]
CH000000856	Wnt activation of LRP5/6/frizzled/axin complex	1	11	1.27919	0.744187	0.86466	["ENSG00000162337"]	["LRP5"]
CH000004279	NR2B:NR2C ---RasGRF1---MEK1---> ERK1	1	11	1.27919	0.744187	0.86466	["ENSG00000102882"]	["MAPK3"]
CH000004282	NR2B:NR2C ---RasGRF1---MEK2---> ERK2	1	11	1.27919	0.744187	0.86466	["ENSG00000126934"]	["MAP2K2"]
CH000004668	AT2 ---> E2F1	1	11	1.27919	0.744187	0.86466	["ENSG00000101412"]	["E2F1"]
CH000003734	L-serine, palmityl-CoA ---> sphingosine	2	22	2.55838	0.744904	0.86466	["ENSG00000090661","ENSG00000223802"]	["CERS1","CERS4"]
CH000004188	NRG ---> Akt-1	2	22	2.55838	0.744904	0.86466	["ENSG00000105723","ENSG00000167965"]	["GSK3A","MLST8"]
CH000004201	Cdc20 ubiquitination	2	22	2.55838	0.744904	0.86466	["ENSG00000117399","ENSG00000130985"]	["CDC20","UBA1"]
CH000004334	interconversions of phosphatidylinositdes	2	22	2.55838	0.744904	0.86466	["ENSG00000143393","ENSG00000204084"]	["INPP5B","PI4KB"]
CH000004373	de novo biosynthesis of ceramide	2	22	2.55838	0.744904	0.86466	["ENSG00000090661","ENSG00000223802"]	["CERS1","CERS4"]
CH000004515	p53 ---Mdm2, YY1---> degradation	2	22	2.55838	0.744904	0.86466	["ENSG00000108344","ENSG00000141510"]	["PSMD3","TP53"]
CH000004578	cofilin-1 degradation	2	22	2.55838	0.744904	0.86466	["ENSG00000108344","ENSG00000197122"]	["PSMD3","SRC"]
CH000000849	p38 pathway 4	4	43	5.00047	0.755114	0.875221	["ENSG00000034152","ENSG00000076984","ENSG00000127191","ENSG00000141510"]	["MAP2K3","MAP2K7","TP53","TRAF2"]
CH000000968	PI3K ---Mdm2---/ p53	3	33	3.83757	0.757215	0.876364	["ENSG00000108344","ENSG00000141510","ENSG00000167965"]	["MLST8","PSMD3","TP53"]
CH000000717	p53 ---> HIF-1alpha degradation	2	23	2.67467	0.767157	0.87656	["ENSG00000108344","ENSG00000141510"]	["PSMD3","TP53"]
CH000003882	Plk1 ---> Emi1	2	23	2.67467	0.767157	0.87656	["ENSG00000108344","ENSG00000166851"]	["PLK1","PSMD3"]
CH000004202	Cdc20 deubiquitination	2	23	2.67467	0.767157	0.87656	["ENSG00000117399","ENSG00000130985"]	["CDC20","UBA1"]
CH000000574	mTOR ----> S6, eIF-4E	1	12	1.39548	0.774091	0.87656	["ENSG00000187840"]	["EIF4EBP1"]
CH000000595	IFNalpha, IFNbeta ---> Rap1	1	12	1.39548	0.774091	0.87656	["ENSG00000105397"]	["TYK2"]
CH000000654	Insulin ---> glucose uptake	1	12	1.39548	0.774091	0.87656	["ENSG00000137312"]	["FLOT1 (ENSG00000137312)"]
CH000000679	release of active TGFbeta	1	12	1.39548	0.774091	0.87656	["ENSG00000090006"]	["LTBP4"]
CH000000724	EGF ---> ERK	1	12	1.39548	0.774091	0.87656	["ENSG00000102882"]	["MAPK3"]
CH000000774	RANKL ---> AKT	1	12	1.39548	0.774091	0.87656	["ENSG00000197122"]	["SRC"]
CH000000827	ZAP-70 ---> c-Jun	1	12	1.39548	0.774091	0.87656	["ENSG00000076984"]	["MAP2K7"]
CH000003724	methionine metabolism	1	12	1.39548	0.774091	0.87656	["ENSG00000101444"]	["AHCY"]
CH000003762	GDP ---> xanthine	1	12	1.39548	0.774091	0.87656	["ENSG00000197586"]	["ENTPD6"]
CH000004303	NGF ---p75NTR---> p50:RelA-p65	1	12	1.39548	0.774091	0.87656	["ENSG00000173039"]	["RELA"]
CH000004472	IFNgamma ---> Rap1	1	12	1.39548	0.774091	0.87656	["ENSG00000204389"]	["HSPA1A (ENSG00000204389)"]
CH000004540	LC3B ---p62---/ Dvl-2	1	12	1.39548	0.774091	0.87656	["ENSG00000130985"]	["UBA1"]
CH000004433	LT-betaR ---NIK, RelB---> CCL19	3	34	3.95386	0.775274	0.876639	["ENSG00000104856","ENSG00000108344","ENSG00000127191"]	["PSMD3","RELB","TRAF2"]
CH000000694	G2/M phase (cyclin B:Cdk1)	6	65	7.55885	0.785985	0.884347	["ENSG00000101224","ENSG00000101412","ENSG00000108344","ENSG00000127564","ENSG00000130985","ENSG00000166851"]	["CDC25B","E2F1","PKMYT1","PLK1","PSMD3","UBA1"]
CH000000881	Smac ---/ cIAP-1	2	24	2.79096	0.78771	0.884347	["ENSG00000108344","ENSG00000130985"]	["PSMD3","UBA1"]
CH000000882	Smac ---/ cIAP-2	2	24	2.79096	0.78771	0.884347	["ENSG00000108344","ENSG00000130985"]	["PSMD3","UBA1"]
CH000000955	E1 ---/ alpha-synuclein	2	24	2.79096	0.78771	0.884347	["ENSG00000108344","ENSG00000130985"]	["PSMD3","UBA1"]
CH000003735	sphingophospholipids metabolism	2	24	2.79096	0.78771	0.884347	["ENSG00000090661","ENSG00000223802"]	["CERS1","CERS4"]
CH000000740	IFNalpha_beta pathway 1	3	35	4.07015	0.792222	0.886883	["ENSG00000105397","ENSG00000163932","ENSG00000182866"]	["LCK","PRKCD","TYK2"]
CH000003940	NMDA receptor signaling	3	35	4.07015	0.792222	0.886883	["ENSG00000102882","ENSG00000126934","ENSG00000197122"]	["MAP2K2","MAPK3","SRC"]
CH000000932	PRL ---> Raf-1	1	13	1.51177	0.800511	0.888578	["ENSG00000078061"]	["ARAF"]
CH000003663	reactions of pyruvate and phosphoenolpyruvate	1	13	1.51177	0.800511	0.888578	["ENSG00000100889"]	["PCK2 (ENSG00000100889)"]
CH000003690	L-isoleucine ---> propionyl-CoA, acetyl-CoA	1	13	1.51177	0.800511	0.888578	["ENSG00000105953"]	["OGDH"]
CH000004199	Emi1 ---Cdc20---/ cyclosome	1	13	1.51177	0.800511	0.888578	["ENSG00000117399"]	["CDC20"]
CH000004260	metabolism of hepoxilins	1	13	1.51177	0.800511	0.888578	["ENSG00000211445"]	["GPX3"]
CH000004294	NT-3 ---trkC---> Erk	1	13	1.51177	0.800511	0.888578	["ENSG00000102882"]	["MAPK3"]
CH000000585	MHC class II ---> NF-AT	2	25	2.90725	0.806653	0.890373	["ENSG00000096433","ENSG00000182866"]	["ITPR3","LCK"]
CH000000741	Epo pathway	2	25	2.90725	0.806653	0.890373	["ENSG00000102882","ENSG00000184557"]	["MAPK3","SOCS3"]
CH000000864	Htt degradation	2	25	2.90725	0.806653	0.890373	["ENSG00000108344","ENSG00000130985"]	["PSMD3","UBA1"]
CH000004434	NIK degradation	2	25	2.90725	0.806653	0.890373	["ENSG00000108344","ENSG00000127191"]	["PSMD3","TRAF2"]
CH000004669	estradiol ---> PRLR	3	36	4.18644	0.808098	0.890719	["ENSG00000158406","ENSG00000172216","ENSG00000197061"]	["CEBPB","H4C3","H4C8"]
CH000000571	LPS ---> JNK	1	14	1.62806	0.823852	0.894556	["ENSG00000130159"]	["ECSIT"]
CH000000596	IFNalpha, IFNbeta ---> PI3K	1	14	1.62806	0.823852	0.894556	["ENSG00000105397"]	["TYK2"]
CH000000831	LPS ---> IRF-3:IRF-7:CBP:p300	1	14	1.62806	0.823852	0.894556	["ENSG00000126456"]	["IRF3"]
CH000000939	PRL ---PI3K---> AKT	1	14	1.62806	0.823852	0.894556	["ENSG00000105723"]	["GSK3A"]
CH000000994	EGF ---> actin polymerization	1	14	1.62806	0.823852	0.894556	["ENSG00000241553"]	["ARPC4"]
CH000003853	DAG ---> PtdIns(3,4)P2	1	14	1.62806	0.823852	0.894556	["ENSG00000143393"]	["PI4KB"]
CH000004284	metabolism of higher gangliosides	1	14	1.62806	0.823852	0.894556	["ENSG00000157350"]	["ST3GAL2"]
CH000004502	leptin --->ERK	1	14	1.62806	0.823852	0.894556	["ENSG00000102882"]	["MAPK3"]
CH000004641	regulation of mesendoderm differentiation genes	1	14	1.62806	0.823852	0.894556	["ENSG00000160973"]	["FOXH1"]
CH000004644	c-Ets-2, repressive complex	1	14	1.62806	0.823852	0.894556	["ENSG00000196498"]	["NCOR2"]
CH000000914	Nrdp1 ---/ apollon	2	26	3.02354	0.824083	0.894556	["ENSG00000108344","ENSG00000130985"]	["PSMD3","UBA1"]
CH000004394	VDR network	4	48	5.58192	0.827666	0.897208	["ENSG00000158406","ENSG00000197061","ENSG00000204231","ENSG00000204435"]	["CSNK2B (ENSG00000204435)","H4C3","H4C8","RXRB (ENSG00000204231)"]
CH000000715	HIF_1alpha pathway 2	8	89	10.3498	0.831828	0.900479	["ENSG00000099804","ENSG00000108106","ENSG00000108344","ENSG00000110711","ENSG00000130725","ENSG00000130985","ENSG00000141510","ENSG00000204389"]	["AIP","CDC34","HSPA1A (ENSG00000204389)","PSMD3","TP53","UBA1","UBE2M","UBE2S"]
CH000003886	cyclinB1 ubiquitination ---> anaphase onset	3	38	4.41902	0.836802	0.904217	["ENSG00000108344","ENSG00000117399","ENSG00000130985"]	["CDC20","PSMD3","UBA1"]
CH000000570	wnt ---> beta-catenin	2	27	3.13983	0.840093	0.904217	["ENSG00000107404","ENSG00000183207"]	["DVL1","RUVBL2"]
CH000000583	Siah ---> beta-catenin	2	27	3.13983	0.840093	0.904217	["ENSG00000108344","ENSG00000179950"]	["PSMD3","PUF60 (ENSG00000179950)"]
CH000000793	IL-8 ---> superoxide	1	15	1.74435	0.844472	0.904217	["ENSG00000105223"]	["PLD3"]
CH000003759	IMP ---> ADP	1	15	1.74435	0.844472	0.904217	["ENSG00000116337"]	["AMPD2"]
CH000004185	generation of reactive oxygen species and their removal	1	15	1.74435	0.844472	0.904217	["ENSG00000211445"]	["GPX3"]
CH000004186	O2, H2O2 ---> H2O	1	15	1.74435	0.844472	0.904217	["ENSG00000211445"]	["GPX3"]
CH000004522	TLR2 ---Rac1--->AKT	1	15	1.74435	0.844472	0.904217	["ENSG00000167965"]	["MLST8"]
CH000004242	HMGCR ---> 26S proteasome	2	28	3.25612	0.854776	0.9101	["ENSG00000108344","ENSG00000130985"]	["PSMD3","UBA1"]
CH000001003	Aurora-A activation, substrates and degradation	5	61	7.09369	0.855595	0.9101	["ENSG00000101224","ENSG00000108344","ENSG00000130985","ENSG00000141510","ENSG00000172531"]	["CDC25B","PPP1CA","PSMD3","TP53","UBA1"]
CH000004446	TNFR1 signaling	3	40	4.6516	0.861742	0.9101	["ENSG00000108344","ENSG00000127191","ENSG00000173039"]	["PSMD3","RELA","TRAF2"]
CH000000610	BCR ---> c-Jun	1	16	1.86064	0.862687	0.9101	["ENSG00000110651"]	["CD81"]
CH000000660	VEGF-A ---> NF-ATc	1	16	1.86064	0.862687	0.9101	["ENSG00000096433"]	["ITPR3"]
CH000004200	MAD2 ---Cdc20---> cyclosome	1	16	1.86064	0.862687	0.9101	["ENSG00000117399"]	["CDC20"]
CH000004290	sialogangliotetraosyl ceramide ---> sphingosine	1	16	1.86064	0.862687	0.9101	["ENSG00000162139"]	["NEU3"]
CH000004316	catabolism of PAF	1	16	1.86064	0.862687	0.9101	["ENSG00000079462"]	["PAFAH1B3"]
CH000004476	IL-17 ---> TRAF6	1	16	1.86064	0.862687	0.9101	["ENSG00000130985"]	["UBA1"]
CH000004588	beta-glucan ---> AKT-1	1	16	1.86064	0.862687	0.9101	["ENSG00000167965"]	["MLST8"]
CH000004628	TGFbeta1 ---Smad7, TAK1---> p38	1	16	1.86064	0.862687	0.9101	["ENSG00000034152"]	["MAP2K3"]
CH000001004	Aurora_A cell cycle regulation	5	62	7.20998	0.865247	0.911579	["ENSG00000101224","ENSG00000108344","ENSG00000130985","ENSG00000141510","ENSG00000172531"]	["CDC25B","PPP1CA","PSMD3","TP53","UBA1"]
CH000000698	IL-1beta ---> c-Jun	1	17	1.97693	0.878777	0.919677	["ENSG00000130159"]	["ECSIT"]
CH000003840	synthesis of glycosphingolipids	1	17	1.97693	0.878777	0.919677	["ENSG00000162139"]	["NEU3"]
CH000004257	NR2A:NR2B ---Pyk2---MEK1---> ERK2	1	17	1.97693	0.878777	0.919677	["ENSG00000197122"]	["SRC"]
CH000004510	IL-5 ---> ERK	1	17	1.97693	0.878777	0.919677	["ENSG00000102882"]	["MAPK3"]
CH000004642	TGFbetaR-I ---pak2, ERK1---> SMAD7, SERPINE1	1	17	1.97693	0.878777	0.919677	["ENSG00000102882"]	["MAPK3"]
CH000004467	p50:RelA-p65 ---> IL8	4	54	6.27966	0.890334	0.930535	["ENSG00000108344","ENSG00000136807","ENSG00000142453","ENSG00000173039"]	["CARM1","CDK9","PSMD3","RELA"]
CH000004666	NF-kappaB ---> genes encoding endothelial adhesion molecules	2	31	3.60499	0.891757	0.930786	["ENSG00000108344","ENSG00000173039"]	["PSMD3","RELA"]
CH000000869	p73 pathway 6	1	18	2.09322	0.892987	0.930836	["ENSG00000127445"]	["PIN1"]
CH000004670	oxygen independent HIF-1alpha degradation	4	55	6.39595	0.898585	0.935431	["ENSG00000099804","ENSG00000108106","ENSG00000108344","ENSG00000130725"]	["CDC34","PSMD3","UBE2M","UBE2S"]
CH000000690	G1 phase (Cdk6)	2	32	3.72128	0.902007	0.937753	["ENSG00000101412","ENSG00000112576"]	["CCND3","E2F1"]
CH000000770	beta-catenin network	1	19	2.20951	0.905538	0.938944	["ENSG00000204435"]	["CSNK2B (ENSG00000204435)"]
CH000004289	degradation of glycosphingolipids	1	19	2.20951	0.905538	0.938944	["ENSG00000162139"]	["NEU3"]
CH000000691	G1 phase (Cdk2) 0	6	79	9.18691	0.913242	0.945686	["ENSG00000101412","ENSG00000105568","ENSG00000108344","ENSG00000112640","ENSG00000130985","ENSG00000167393"]	["E2F1","PPP2R1A","PPP2R3B (ENSG00000167393)","PPP2R5D","PSMD3","UBA1"]
CH000004570	ErbB1 ---Sos1, H-Ras---> Rac activation	1	20	2.3258	0.916622	0.947939	["ENSG00000102882"]	["MAPK3"]
CH000004205	cyclosome ---> Nek2A	2	34	3.95386	0.919853	0.950031	["ENSG00000108344","ENSG00000117399"]	["CDC20","PSMD3"]
CH000000769	wnt pathway	4	59	6.86111	0.92638	0.953018	["ENSG00000107404","ENSG00000108344","ENSG00000179950","ENSG00000183207"]	["DVL1","PSMD3","PUF60 (ENSG00000179950)","RUVBL2"]
CH000000987	hypoxia pathways	1	21	2.44209	0.926411	0.953018	["ENSG00000204435"]	["CSNK2B (ENSG00000204435)"]
CH000004456	NOS regulation	1	21	2.44209	0.926411	0.953018	["ENSG00000079805"]	["DNM2"]
CH000000689	G1 phase (Cdk4)	2	35	4.07015	0.927588	0.953018	["ENSG00000101412","ENSG00000112576"]	["CCND3","E2F1"]
CH000000711	TGFbeta pathway	12	145	16.8621	0.930342	0.954602	["ENSG00000034152","ENSG00000068323","ENSG00000090006","ENSG00000099917","ENSG00000100324","ENSG00000102882","ENSG00000108344","ENSG00000126767","ENSG00000140464","ENSG00000160973","ENSG00000185359","ENSG00000197122"]	["ELK1","FOXH1","HGS","LTBP4","MAP2K3","MAPK3","MED15","PML","PSMD3","SRC","TAB1","TFE3"]
CH000004481	IL-3 ---AKT-1---/ LNC2	1	22	2.55838	0.935054	0.958187	["ENSG00000167965"]	["MLST8"]
CH000000747	E2F network	10	126	14.6525	0.936304	0.95822	["ENSG00000101224","ENSG00000101412","ENSG00000105568","ENSG00000108344","ENSG00000112576","ENSG00000112640","ENSG00000127564","ENSG00000130985","ENSG00000166851","ENSG00000167393"]	["CCND3","CDC25B","E2F1","PKMYT1","PLK1","PPP2R1A","PPP2R3B (ENSG00000167393)","PPP2R5D","PSMD3","UBA1"]
CH000003415	Mdm2 ---> p/CAF	1	23	2.67467	0.942685	0.963498	["ENSG00000108344"]	["PSMD3"]
CH000004397	VDR ---> RXR-alpha ---> transcriptional activation	2	38	4.41902	0.946786	0.966434	["ENSG00000158406","ENSG00000197061"]	["H4C3","H4C8"]
CH000004150	Cul3 ---/ Nrf2	1	24	2.79096	0.949423	0.967871	["ENSG00000108344"]	["PSMD3"]
CH000004209	securin degradation	2	39	4.53531	0.952033	0.969276	["ENSG00000108344","ENSG00000164611"]	["PSMD3","PTTG1"]
CH000003412	Akt-1 ---Mdm2---> AR	1	25	2.90725	0.955372	0.970165	["ENSG00000108344"]	["PSMD3"]
CH000003555	NIPA ---> cyclin B1	1	25	2.90725	0.955372	0.970165	["ENSG00000108344"]	["PSMD3"]
CH000000121	p105 ---> p50	1	26	3.02354	0.960624	0.972987	["ENSG00000108344"]	["PSMD3"]
CH000004458	phosphatidylcholine, ceramide ---> DAG, monoacylglycerol	1	26	3.02354	0.960624	0.972987	["ENSG00000185000"]	["DGAT1 (ENSG00000185000)"]
CH000000692	S phase (Cdk2) 1	3	55	6.39595	0.963889	0.975039	["ENSG00000101224","ENSG00000101412","ENSG00000127564"]	["CDC25B","E2F1","PKMYT1"]
CH000000682	Smurf-1 ---/ Smad7, TGFbetaR-I	1	27	3.13983	0.96526	0.975172	["ENSG00000108344"]	["PSMD3"]
CH000004525	diacyl lipopeptide, TLR2	2	43	5.00047	0.968492	0.977184	["ENSG00000108344","ENSG00000173039"]	["PSMD3","RELA"]
CH000001016	AR pathway	2	44	5.11676	0.971668	0.977934	["ENSG00000108344","ENSG00000196498"]	["NCOR2","PSMD3"]
CH000004521	TLR2_mediated signaling	3	58	6.74482	0.972858	0.977934	["ENSG00000108344","ENSG00000167965","ENSG00000173039"]	["MLST8","PSMD3","RELA"]
CH000000573	phosphorylation and ubiquitination of beta-catenin	1	29	3.37241	0.972963	0.977934	["ENSG00000108344"]	["PSMD3"]
CH000004254	HMGCR regulation	3	59	6.86111	0.975348	0.97908	["ENSG00000108344","ENSG00000118046","ENSG00000130985"]	["PSMD3","STK11","UBA1"]
CH000004207	Fzr1 ---> cyclin B1 degradation	1	34	3.95386	0.98557	0.988081	["ENSG00000108344"]	["PSMD3"]
CH000000683	cyclosome ---/ SnoN	1	37	4.30273	0.990107	0.991367	["ENSG00000108344"]	["PSMD3"]
CH000004600	mammalian Hippo network	1	51	5.93079	0.998314	0.998314	["ENSG00000172531"]	["PPP1CA"]
