# Supplementary material for: Human induced pluripotent stem cell culture on a non-coated dish using medium supplemented with milk fat globule epidermal growth factor 8
Source: Research Square preprint supplement (doi:10.21203/rs.3.rs-2811612/v1), 2023-04-24
Supplement: Supplementary file 2 [file 8e5ec59329a87bc67ac9ae01.xlsx]

## Sheet: TRANSPATH Pathways (2022.1)
ID	Title	Number of hits	Group size	Expected hits	P-value	Adjusted P-value	Hits	Hit names
CH000000715	HIF_1alpha pathway 2	31	89	11.565	5.39974e-08	3.83922e-05	["ENSG00000005339","ENSG00000078140","ENSG00000080824","ENSG00000100030","ENSG00000100387","ENSG00000100393","ENSG00000100644","ENSG00000100764","ENSG00000101182","ENSG00000103035","ENSG00000108671","ENSG00000109332","ENSG00000110958","ENSG00000115233","ENSG00000119048","ENSG00000120438","ENSG00000130066","ENSG00000136810","ENSG00000138814","ENSG00000146731","ENSG00000154582","ENSG00000156261","E…	["CCT2","CCT6A","CCT8","CREBBP","ELOC","EP300","HIF1A","HSP90AA1","MAPK1","PPP3CA","PSMA7","PSMC1","PSMD1","PSMD11","PSMD12","PSMD14","PSMD7","PTGES3","RBX1","SAT1","TCP1","TXN","TXNRD1","UBE2B","UBE2D3","UBE2E1","UBE2G2","UBE2H","UBE2K","UBE2N","UBE2V2"]
CH000000747	E2F network	37	126	16.3729	4.16925e-07	0.000148217	["ENSG00000055130","ENSG00000078304","ENSG00000079246","ENSG00000100387","ENSG00000100764","ENSG00000101182","ENSG00000103035","ENSG00000108671","ENSG00000108953","ENSG00000109332","ENSG00000112242","ENSG00000113558","ENSG00000113575","ENSG00000114126","ENSG00000115233","ENSG00000118971","ENSG00000128245","ENSG00000132646","ENSG00000134308","ENSG00000138814","ENSG00000143933","ENSG00000145386","E…	["CALM1","CALM2","CCNA2","CCNB2","CCND2","CDC25C","CDK1","CUL1","E2F3","E2F7","PCNA","PPP2CA","PPP2R5C","PPP3CA","PPP3R1","PRKDC","PSMA7","PSMC1","PSMD1","PSMD11","PSMD12","PSMD14","PSMD7","RBX1","SKP1","SKP2","TFDP1","TFDP2","UBE2D3","WEE1","XRCC5","YWHAB","YWHAE (ENSG00000108953)","YWHAG","YWHAH","YWHAQ","YWHAZ"]
CH000000667	VHL ---> HIF-1alpha degradation	22	59	7.66667	1.40974e-06	0.000276803	["ENSG00000078140","ENSG00000100387","ENSG00000100644","ENSG00000100764","ENSG00000101182","ENSG00000103035","ENSG00000108671","ENSG00000109332","ENSG00000115233","ENSG00000119048","ENSG00000120438","ENSG00000146731","ENSG00000154582","ENSG00000156261","ENSG00000166226","ENSG00000169139","ENSG00000170142","ENSG00000173692","ENSG00000177889","ENSG00000184787","ENSG00000186591","ENSG00000197170"]	["CCT2","CCT6A","CCT8","ELOC","HIF1A","PSMA7","PSMC1","PSMD1","PSMD11","PSMD12","PSMD14","PSMD7","RBX1","TCP1","UBE2B","UBE2D3","UBE2E1","UBE2G2","UBE2H","UBE2K","UBE2N","UBE2V2"]
CH000004670	oxygen independent HIF-1alpha degradation	21	55	7.14689	1.57497e-06	0.000276803	["ENSG00000078140","ENSG00000080824","ENSG00000100387","ENSG00000100644","ENSG00000100764","ENSG00000101182","ENSG00000103035","ENSG00000108671","ENSG00000109332","ENSG00000115233","ENSG00000119048","ENSG00000130066","ENSG00000138814","ENSG00000154582","ENSG00000169139","ENSG00000170142","ENSG00000173692","ENSG00000177889","ENSG00000184787","ENSG00000186591","ENSG00000197170"]	["ELOC","HIF1A","HSP90AA1","PPP3CA","PSMA7","PSMC1","PSMD1","PSMD11","PSMD12","PSMD14","PSMD7","RBX1","SAT1","UBE2B","UBE2D3","UBE2E1","UBE2G2","UBE2H","UBE2K","UBE2N","UBE2V2"]
CH000004693	YAP ubiquitination	10	15	1.94915	1.94658e-06	0.000276803	["ENSG00000055130","ENSG00000100387","ENSG00000108953","ENSG00000113558","ENSG00000128245","ENSG00000134308","ENSG00000137693","ENSG00000164924","ENSG00000166913","ENSG00000170027"]	["CUL1","RBX1","SKP1","YAP1","YWHAB","YWHAE (ENSG00000108953)","YWHAG","YWHAH","YWHAQ","YWHAZ"]
CH000000692	S phase (Cdk2) 1	20	55	7.14689	6.84563e-06	0.000811207	["ENSG00000055130","ENSG00000079246","ENSG00000100387","ENSG00000108953","ENSG00000112242","ENSG00000113558","ENSG00000114126","ENSG00000128245","ENSG00000134308","ENSG00000145386","ENSG00000145604","ENSG00000158402","ENSG00000164924","ENSG00000165891","ENSG00000166483","ENSG00000166913","ENSG00000170027","ENSG00000170312","ENSG00000198176","ENSG00000253729"]	["CCNA2","CDC25C","CDK1","CUL1","E2F3","E2F7","PRKDC","RBX1","SKP1","SKP2","TFDP1","TFDP2","WEE1","XRCC5","YWHAB","YWHAE (ENSG00000108953)","YWHAG","YWHAH","YWHAQ","YWHAZ"]
CH000001002	Plk1 cell cycle regulation	19	52	6.75706	1.08395e-05	0.00110099	["ENSG00000055130","ENSG00000065613","ENSG00000100387","ENSG00000100764","ENSG00000101182","ENSG00000103035","ENSG00000108671","ENSG00000112029","ENSG00000113558","ENSG00000115233","ENSG00000117632","ENSG00000133112","ENSG00000137807","ENSG00000157456","ENSG00000158402","ENSG00000166483","ENSG00000170312","ENSG00000173692","ENSG00000197170"]	["CCNB2","CDC25C","CDK1","CUL1","FBXO5","KIF23","PSMA7","PSMC1","PSMD1","PSMD11","PSMD12","PSMD14","PSMD7","RBX1","SKP1","SLK","STMN1","TPT1","WEE1"]
CH000004208	AKT-1 ---/YAP	7	9	1.16949	1.66451e-05	0.0013656	["ENSG00000108953","ENSG00000128245","ENSG00000134308","ENSG00000137693","ENSG00000164924","ENSG00000166913","ENSG00000170027"]	["YAP1","YWHAB","YWHAE (ENSG00000108953)","YWHAG","YWHAH","YWHAQ","YWHAZ"]
CH000000919	cyclosome regulatory network	20	58	7.53672	1.72861e-05	0.0013656	["ENSG00000004897","ENSG00000055130","ENSG00000080986","ENSG00000100387","ENSG00000100764","ENSG00000101182","ENSG00000103035","ENSG00000108671","ENSG00000109332","ENSG00000112029","ENSG00000113558","ENSG00000115233","ENSG00000136603","ENSG00000145386","ENSG00000145604","ENSG00000157456","ENSG00000164109","ENSG00000170312","ENSG00000173692","ENSG00000197170"]	["CCNA2","CCNB2","CDC27","CDK1","CUL1","FBXO5","MAD2L1","NDC80","PSMA7","PSMC1","PSMD1","PSMD11","PSMD12","PSMD14","PSMD7","RBX1","SKIL","SKP1","SKP2","UBE2D3"]
CH000000918	cyclosome regulation	19	54	7.01695	2.03663e-05	0.00144804	["ENSG00000004897","ENSG00000055130","ENSG00000080986","ENSG00000100387","ENSG00000100764","ENSG00000101182","ENSG00000103035","ENSG00000108671","ENSG00000109332","ENSG00000112029","ENSG00000113558","ENSG00000115233","ENSG00000145386","ENSG00000145604","ENSG00000157456","ENSG00000164109","ENSG00000170312","ENSG00000173692","ENSG00000197170"]	["CCNA2","CCNB2","CDC27","CDK1","CUL1","FBXO5","MAD2L1","NDC80","PSMA7","PSMC1","PSMD1","PSMD11","PSMD12","PSMD14","PSMD7","RBX1","SKP1","SKP2","UBE2D3"]
CH000003553	Aurora-B cell cycle regulation	19	55	7.14689	2.75022e-05	0.00177764	["ENSG00000004897","ENSG00000055130","ENSG00000100387","ENSG00000100764","ENSG00000101182","ENSG00000103035","ENSG00000108671","ENSG00000113558","ENSG00000115233","ENSG00000136014","ENSG00000138778","ENSG00000154473","ENSG00000156970","ENSG00000157456","ENSG00000164109","ENSG00000169679","ENSG00000170312","ENSG00000173692","ENSG00000197170"]	["BUB1","BUB1B","BUB3","CCNB2","CDC27","CDK1","CENPE","CUL1","MAD2L1","PSMA7","PSMC1","PSMD1","PSMD11","PSMD12","PSMD14","PSMD7","RBX1","SKP1","USP44"]
CH000000694	G2/M phase (cyclin B:Cdk1)	21	65	8.44633	3.30327e-05	0.00195719	["ENSG00000055130","ENSG00000079246","ENSG00000100387","ENSG00000100764","ENSG00000101182","ENSG00000103035","ENSG00000108671","ENSG00000112242","ENSG00000113558","ENSG00000114126","ENSG00000115233","ENSG00000157456","ENSG00000158402","ENSG00000165891","ENSG00000166483","ENSG00000166913","ENSG00000170312","ENSG00000173692","ENSG00000197170","ENSG00000198176","ENSG00000253729"]	["CCNB2","CDC25C","CDK1","CUL1","E2F3","E2F7","PRKDC","PSMA7","PSMC1","PSMD1","PSMD11","PSMD12","PSMD14","PSMD7","RBX1","SKP1","TFDP1","TFDP2","WEE1","XRCC5","YWHAB"]
CH000000946	Plk1, Cdk1 ---/ Wee1	13	31	4.02825	5.32194e-05	0.00291069	["ENSG00000055130","ENSG00000100387","ENSG00000100764","ENSG00000101182","ENSG00000103035","ENSG00000108671","ENSG00000113558","ENSG00000115233","ENSG00000157456","ENSG00000166483","ENSG00000170312","ENSG00000173692","ENSG00000197170"]	["CCNB2","CDK1","CUL1","PSMA7","PSMC1","PSMD1","PSMD11","PSMD12","PSMD14","PSMD7","RBX1","SKP1","WEE1"]
CH000000691	G1 phase (Cdk2) 0	23	79	10.2655	8.89007e-05	0.00451489	["ENSG00000055130","ENSG00000078304","ENSG00000079246","ENSG00000100387","ENSG00000100764","ENSG00000101182","ENSG00000103035","ENSG00000108671","ENSG00000109332","ENSG00000112242","ENSG00000113558","ENSG00000113575","ENSG00000114126","ENSG00000115233","ENSG00000132646","ENSG00000134308","ENSG00000145604","ENSG00000165891","ENSG00000166483","ENSG00000173692","ENSG00000197170","ENSG00000198176","E…	["CUL1","E2F3","E2F7","PCNA","PPP2CA","PPP2R5C","PRKDC","PSMA7","PSMC1","PSMD1","PSMD11","PSMD12","PSMD14","PSMD7","RBX1","SKP1","SKP2","TFDP1","TFDP2","UBE2D3","WEE1","XRCC5","YWHAQ"]
CH000004646	Smad2/3 ---TAZ---> cytoplasmic retention	7	11	1.42938	0.000120659	0.00548629	["ENSG00000108953","ENSG00000128245","ENSG00000134308","ENSG00000164924","ENSG00000166913","ENSG00000170027","ENSG00000175387"]	["SMAD2","YWHAB","YWHAE (ENSG00000108953)","YWHAG","YWHAH","YWHAQ","YWHAZ"]
CH000004600	mammalian Hippo network	17	51	6.62712	0.000123461	0.00548629	["ENSG00000055130","ENSG00000100387","ENSG00000108953","ENSG00000113558","ENSG00000128245","ENSG00000134308","ENSG00000137693","ENSG00000158528","ENSG00000162521","ENSG00000164924","ENSG00000166913","ENSG00000170027","ENSG00000175387","ENSG00000186298","ENSG00000187079","ENSG00000198176","ENSG00000213639"]	["CUL1","PPP1CB","PPP1CC","PPP1R9A","RBBP4","RBX1","SKP1","SMAD2","TEAD1","TFDP1","YAP1","YWHAB","YWHAE (ENSG00000108953)","YWHAG","YWHAH","YWHAQ","YWHAZ"]
CH000001003	Aurora-A activation, substrates and degradation	19	61	7.92655	0.000138847	0.00580706	["ENSG00000004897","ENSG00000065150","ENSG00000067900","ENSG00000080986","ENSG00000083312","ENSG00000100764","ENSG00000101182","ENSG00000102753","ENSG00000103035","ENSG00000108424","ENSG00000108671","ENSG00000115233","ENSG00000132341","ENSG00000158528","ENSG00000173692","ENSG00000186298","ENSG00000186432","ENSG00000197170","ENSG00000213639"]	["CDC27","IPO5","KPNA3","KPNA4","KPNB1","NDC80","PPP1CB","PPP1CC","PPP1R9A","PSMA7","PSMC1","PSMD1","PSMD11","PSMD12","PSMD14","PSMD7","RAN","ROCK1","TNPO1"]
CH000001004	Aurora_A cell cycle regulation	19	62	8.0565	0.000176969	0.00699029	["ENSG00000004897","ENSG00000065150","ENSG00000067900","ENSG00000080986","ENSG00000083312","ENSG00000100764","ENSG00000101182","ENSG00000102753","ENSG00000103035","ENSG00000108424","ENSG00000108671","ENSG00000115233","ENSG00000132341","ENSG00000158528","ENSG00000173692","ENSG00000186298","ENSG00000186432","ENSG00000197170","ENSG00000213639"]	["CDC27","IPO5","KPNA3","KPNA4","KPNB1","NDC80","PPP1CB","PPP1CC","PPP1R9A","PSMA7","PSMC1","PSMD1","PSMD11","PSMD12","PSMD14","PSMD7","RAN","ROCK1","TNPO1"]
CH000000573	phosphorylation and ubiquitination of beta-catenin	11	29	3.76836	0.000581057	0.0213958	["ENSG00000055130","ENSG00000100764","ENSG00000101182","ENSG00000103035","ENSG00000108671","ENSG00000113558","ENSG00000113712","ENSG00000115233","ENSG00000168036","ENSG00000173692","ENSG00000197170"]	["CSNK1A1","CTNNB1","CUL1","PSMA7","PSMC1","PSMD1","PSMD11","PSMD12","PSMD14","PSMD7","SKP1"]
CH000003582	CENP-E ---> BubR1	5	7	0.909605	0.000601851	0.0213958	["ENSG00000138778","ENSG00000154473","ENSG00000156970","ENSG00000164109","ENSG00000169679"]	["BUB1","BUB1B","BUB3","CENPE","MAD2L1"]
CH000003555	NIPA ---> cyclin B1	10	25	3.24859	0.000634679	0.0214884	["ENSG00000055130","ENSG00000100387","ENSG00000100764","ENSG00000101182","ENSG00000103035","ENSG00000108671","ENSG00000113558","ENSG00000115233","ENSG00000173692","ENSG00000197170"]	["CUL1","PSMA7","PSMC1","PSMD1","PSMD11","PSMD12","PSMD14","PSMD7","RBX1","SKP1"]
CH000004149	Nrf2 pathway	11	30	3.89831	0.000813201	0.0262812	["ENSG00000005339","ENSG00000036257","ENSG00000100387","ENSG00000100764","ENSG00000101182","ENSG00000103035","ENSG00000108671","ENSG00000115233","ENSG00000168036","ENSG00000173692","ENSG00000197170"]	["CREBBP","CTNNB1","CUL3","PSMA7","PSMC1","PSMD1","PSMD11","PSMD12","PSMD14","PSMD7","RBX1"]
CH000004599	MST2 ---> YAP, TAZ	7	14	1.81921	0.000883873	0.0271015	["ENSG00000108953","ENSG00000128245","ENSG00000134308","ENSG00000137693","ENSG00000164924","ENSG00000166913","ENSG00000170027"]	["YAP1","YWHAB","YWHAE (ENSG00000108953)","YWHAG","YWHAH","YWHAQ","YWHAZ"]
CH000000121	p105 ---> p50	10	26	3.37853	0.000914817	0.0271015	["ENSG00000055130","ENSG00000100387","ENSG00000100764","ENSG00000101182","ENSG00000103035","ENSG00000108671","ENSG00000113558","ENSG00000115233","ENSG00000173692","ENSG00000197170"]	["CUL1","PSMA7","PSMC1","PSMD1","PSMD11","PSMD12","PSMD14","PSMD7","RBX1","SKP1"]
CH000004666	NF-kappaB ---> genes encoding endothelial adhesion molecules	11	31	4.02825	0.00111735	0.0317774	["ENSG00000055130","ENSG00000100387","ENSG00000100764","ENSG00000101182","ENSG00000103035","ENSG00000108671","ENSG00000109332","ENSG00000113558","ENSG00000115233","ENSG00000173692","ENSG00000197170"]	["CUL1","PSMA7","PSMC1","PSMD1","PSMD11","PSMD12","PSMD14","PSMD7","RBX1","SKP1","UBE2D3"]
CH000000685	Smad3 nuclear translocation	4	5	0.649718	0.00125516	0.0343239	["ENSG00000065150","ENSG00000083312","ENSG00000108424","ENSG00000132341"]	["IPO5","KPNB1","RAN","TNPO1"]
CH000004198	Metaphase to Anaphase transition	15	52	6.75706	0.00172333	0.0451725	["ENSG00000004897","ENSG00000100764","ENSG00000101182","ENSG00000103035","ENSG00000108671","ENSG00000112029","ENSG00000115233","ENSG00000136014","ENSG00000154473","ENSG00000156970","ENSG00000164109","ENSG00000169679","ENSG00000170312","ENSG00000173692","ENSG00000197170"]	["BUB1","BUB1B","BUB3","CDC27","CDK1","FBXO5","MAD2L1","PSMA7","PSMC1","PSMD1","PSMD11","PSMD12","PSMD14","PSMD7","USP44"]
CH000004242	HMGCR ---> 26S proteasome	10	28	3.63842	0.00177894	0.0451725	["ENSG00000100764","ENSG00000101182","ENSG00000103035","ENSG00000108671","ENSG00000113161","ENSG00000115233","ENSG00000173692","ENSG00000184787","ENSG00000186480","ENSG00000197170"]	["HMGCR","INSIG1","PSMA7","PSMC1","PSMD1","PSMD11","PSMD12","PSMD14","PSMD7","UBE2G2"]
CH000000822	c-Jun degradation	9	24	3.11864	0.00204414	0.0468272	["ENSG00000100764","ENSG00000101182","ENSG00000103035","ENSG00000108671","ENSG00000109670","ENSG00000115233","ENSG00000173692","ENSG00000177606","ENSG00000197170"]	["FBXW7","JUN","PSMA7","PSMC1","PSMD1","PSMD11","PSMD12","PSMD14","PSMD7"]
CH000004150	Cul3 ---/ Nrf2	9	24	3.11864	0.00204414	0.0468272	["ENSG00000036257","ENSG00000100387","ENSG00000100764","ENSG00000101182","ENSG00000103035","ENSG00000108671","ENSG00000115233","ENSG00000173692","ENSG00000197170"]	["CUL3","PSMA7","PSMC1","PSMD1","PSMD11","PSMD12","PSMD14","PSMD7","RBX1"]
CH000004539	AKT-1 ---PRAS40---> mTOR	6	12	1.55932	0.00212705	0.0468272	["ENSG00000108953","ENSG00000128245","ENSG00000134308","ENSG00000164924","ENSG00000166913","ENSG00000170027"]	["YWHAB","YWHAE (ENSG00000108953)","YWHAG","YWHAH","YWHAQ","YWHAZ"]
CH000004474	brca1 ---> IRF7	3	3	0.389831	0.00217341	0.0468272	["ENSG00000005339","ENSG00000012048","ENSG00000115415"]	["BRCA1","CREBBP","STAT1"]
CH000004643	ERK ---c-Ets-2---> ECM protease genes	3	3	0.389831	0.00217341	0.0468272	["ENSG00000100030","ENSG00000100393","ENSG00000157557"]	["EP300","ETS2","MAPK1"]
CH000000879	Caspase network	20	81	10.5254	0.0025737	0.0519768	["ENSG00000065243","ENSG00000070831","ENSG00000079246","ENSG00000100764","ENSG00000101182","ENSG00000101966","ENSG00000103035","ENSG00000108671","ENSG00000115233","ENSG00000115541","ENSG00000134308","ENSG00000143384","ENSG00000144381","ENSG00000164754","ENSG00000167552","ENSG00000170142","ENSG00000172115","ENSG00000173692","ENSG00000197170","ENSG00000253729"]	["CDC42","CYCS","HSPD1","HSPE1","MCL1","PKN2","PRKDC","PSMA7","PSMC1","PSMD1","PSMD11","PSMD12","PSMD14","PSMD7","RAD21","TUBA1A","UBE2E1","XIAP","XRCC5","YWHAQ"]
CH000004467	p50:RelA-p65 ---> IL8	15	54	7.01695	0.00260725	0.0519768	["ENSG00000005339","ENSG00000055130","ENSG00000100387","ENSG00000100764","ENSG00000101182","ENSG00000103035","ENSG00000108671","ENSG00000109332","ENSG00000113558","ENSG00000115233","ENSG00000129315","ENSG00000132475","ENSG00000163041","ENSG00000173692","ENSG00000197170"]	["CCNT1","CREBBP","CUL1","H3-3A","H3-3B","PSMA7","PSMC1","PSMD1","PSMD11","PSMD12","PSMD14","PSMD7","RBX1","SKP1","UBE2D3"]
CH000004433	LT-betaR ---NIK, RelB---> CCL19	11	34	4.41808	0.00263174	0.0519768	["ENSG00000055130","ENSG00000100387","ENSG00000100764","ENSG00000101182","ENSG00000103035","ENSG00000108671","ENSG00000109332","ENSG00000113558","ENSG00000115233","ENSG00000173692","ENSG00000197170"]	["CUL1","PSMA7","PSMC1","PSMD1","PSMD11","PSMD12","PSMD14","PSMD7","RBX1","SKP1","UBE2D3"]
CH000000693	G2/M phase (cyclin A:Cdk1)	8	21	2.72881	0.00324425	0.0546289	["ENSG00000112242","ENSG00000114126","ENSG00000145386","ENSG00000158402","ENSG00000165891","ENSG00000166483","ENSG00000170312","ENSG00000198176"]	["CCNA2","CDC25C","CDK1","E2F3","E2F7","TFDP1","TFDP2","WEE1"]
CH000004597	VE-cadherin ---> FOXO1A	8	21	2.72881	0.00324425	0.0546289	["ENSG00000108953","ENSG00000128245","ENSG00000134308","ENSG00000164924","ENSG00000166913","ENSG00000168036","ENSG00000170027","ENSG00000198561"]	["CTNNB1","CTNND1","YWHAB","YWHAE (ENSG00000108953)","YWHAG","YWHAH","YWHAQ","YWHAZ"]
CH000004598	VE-cadherin network	8	21	2.72881	0.00324425	0.0546289	["ENSG00000108953","ENSG00000128245","ENSG00000134308","ENSG00000164924","ENSG00000166913","ENSG00000168036","ENSG00000170027","ENSG00000198561"]	["CTNNB1","CTNND1","YWHAB","YWHAE (ENSG00000108953)","YWHAG","YWHAH","YWHAQ","YWHAZ"]
CH000000947	parkin associated pathways	17	66	8.57627	0.00333306	0.0546289	["ENSG00000055130","ENSG00000085832","ENSG00000086061","ENSG00000100764","ENSG00000101182","ENSG00000103035","ENSG00000108671","ENSG00000109332","ENSG00000109670","ENSG00000109971","ENSG00000115233","ENSG00000143933","ENSG00000167552","ENSG00000173692","ENSG00000177889","ENSG00000197170","ENSG00000198668"]	["CALM1","CALM2","CUL1","DNAJA1","EPS15","FBXW7","HSPA8","PSMA7","PSMC1","PSMD1","PSMD11","PSMD12","PSMD14","PSMD7","TUBA1A","UBE2D3","UBE2N"]
CH000000122	SCF-betaTrCP1 ---> NF-kappaB1-p50	4	6	0.779661	0.00338069	0.0546289	["ENSG00000055130","ENSG00000100387","ENSG00000109332","ENSG00000113558"]	["CUL1","RBX1","SKP1","UBE2D3"]
CH000003564	Bub1 ---> APC7	4	6	0.779661	0.00338069	0.0546289	["ENSG00000154473","ENSG00000156970","ENSG00000164109","ENSG00000169679"]	["BUB1","BUB1B","BUB3","MAD2L1"]
CH000004710	Elk-1 ubiquitination	4	6	0.779661	0.00338069	0.0546289	["ENSG00000055130","ENSG00000100387","ENSG00000109332","ENSG00000113558"]	["CUL1","RBX1","SKP1","UBE2D3"]
CH000004726	ID complex deubiquitylation	4	6	0.779661	0.00338069	0.0546289	["ENSG00000114742","ENSG00000140525","ENSG00000144554","ENSG00000162607"]	["FANCD2","FANCI","USP1","WDR48"]
CH000004515	p53 ---Mdm2, YY1---> degradation	8	22	2.85876	0.00453457	0.0716462	["ENSG00000100764","ENSG00000100811","ENSG00000101182","ENSG00000103035","ENSG00000108671","ENSG00000115233","ENSG00000173692","ENSG00000197170"]	["PSMA7","PSMC1","PSMD1","PSMD11","PSMD12","PSMD14","PSMD7","YY1"]
CH000000583	Siah ---> beta-catenin	9	27	3.50847	0.00513739	0.0794062	["ENSG00000100764","ENSG00000101182","ENSG00000103035","ENSG00000108671","ENSG00000113558","ENSG00000115233","ENSG00000168036","ENSG00000173692","ENSG00000197170"]	["CTNNB1","PSMA7","PSMC1","PSMD1","PSMD11","PSMD12","PSMD14","PSMD7","SKP1"]
CH000004437	lymphotoxin B receptor signaling	11	37	4.80791	0.00548852	0.0830284	["ENSG00000055130","ENSG00000100387","ENSG00000100764","ENSG00000101182","ENSG00000103035","ENSG00000108671","ENSG00000109332","ENSG00000113558","ENSG00000115233","ENSG00000173692","ENSG00000197170"]	["CUL1","PSMA7","PSMC1","PSMD1","PSMD11","PSMD12","PSMD14","PSMD7","RBX1","SKP1","UBE2D3"]
CH000000717	p53 ---> HIF-1alpha degradation	8	23	2.9887	0.00618576	0.0897566	["ENSG00000100644","ENSG00000100764","ENSG00000101182","ENSG00000103035","ENSG00000108671","ENSG00000115233","ENSG00000173692","ENSG00000197170"]	["HIF1A","PSMA7","PSMC1","PSMD1","PSMD11","PSMD12","PSMD14","PSMD7"]
CH000003882	Plk1 ---> Emi1	8	23	2.9887	0.00618576	0.0897566	["ENSG00000100764","ENSG00000101182","ENSG00000103035","ENSG00000108671","ENSG00000112029","ENSG00000115233","ENSG00000173692","ENSG00000197170"]	["FBXO5","PSMA7","PSMC1","PSMD1","PSMD11","PSMD12","PSMD14","PSMD7"]
CH000000710	p53 pathway	24	111	14.4237	0.00647807	0.0921182	["ENSG00000079246","ENSG00000092201","ENSG00000100393","ENSG00000100644","ENSG00000100764","ENSG00000100811","ENSG00000101182","ENSG00000102753","ENSG00000103035","ENSG00000108671","ENSG00000109332","ENSG00000115233","ENSG00000142676","ENSG00000145386","ENSG00000169139","ENSG00000172115","ENSG00000173473","ENSG00000173692","ENSG00000175029","ENSG00000177889","ENSG00000186432","ENSG00000187555","E…	["CCNA2","CTBP2","CYCS","EP300","HIF1A","KPNA3","KPNA4","PRKDC","PSMA7","PSMC1","PSMD1","PSMD11","PSMD12","PSMD14","PSMD7","RPL11","SMARCC1","SUPT16H","UBE2D3","UBE2N","UBE2V2","USP7","XRCC5","YY1"]
CH000004538	AMPK ---14-3-3---/ mTOR	7	19	2.46893	0.00727046	0.101359	["ENSG00000023287","ENSG00000108953","ENSG00000128245","ENSG00000134308","ENSG00000164924","ENSG00000166913","ENSG00000170027"]	["RB1CC1","YWHAB","YWHAE (ENSG00000108953)","YWHAG","YWHAH","YWHAQ","YWHAZ"]
CH000004664	HIF-1 ---> expression of hypoxia induced genes	3	4	0.519774	0.00785442	0.104829	["ENSG00000005339","ENSG00000100393","ENSG00000100644"]	["CREBBP","EP300","HIF1A"]
CH000001016	AR pathway	12	44	5.71751	0.00808474	0.104829	["ENSG00000033800","ENSG00000100393","ENSG00000100764","ENSG00000101182","ENSG00000103035","ENSG00000108671","ENSG00000115233","ENSG00000135486","ENSG00000141027","ENSG00000156802","ENSG00000173692","ENSG00000197170"]	["ATAD2","EP300","HNRNPA1","NCOR1","PIAS1","PSMA7","PSMC1","PSMD1","PSMD11","PSMD12","PSMD14","PSMD7"]
CH000000881	Smac ---/ cIAP-1	8	24	3.11864	0.00825656	0.104829	["ENSG00000100764","ENSG00000101182","ENSG00000103035","ENSG00000108671","ENSG00000115233","ENSG00000170142","ENSG00000173692","ENSG00000197170"]	["PSMA7","PSMC1","PSMD1","PSMD11","PSMD12","PSMD14","PSMD7","UBE2E1"]
CH000000882	Smac ---/ cIAP-2	8	24	3.11864	0.00825656	0.104829	["ENSG00000100764","ENSG00000101182","ENSG00000103035","ENSG00000108671","ENSG00000115233","ENSG00000170142","ENSG00000173692","ENSG00000197170"]	["PSMA7","PSMC1","PSMD1","PSMD11","PSMD12","PSMD14","PSMD7","UBE2E1"]
CH000004572	EGF ---Raf-1---> ERK2	8	24	3.11864	0.00825656	0.104829	["ENSG00000078304","ENSG00000100030","ENSG00000113575","ENSG00000115904","ENSG00000133703","ENSG00000164924","ENSG00000175387","ENSG00000213281"]	["KRAS","MAPK1","NRAS","PPP2CA","PPP2R5C","SMAD2","SOS1","YWHAZ"]
CH000004283	ER-alpha ---CHIP---> 26S proteasome	9	29	3.76836	0.0086717	0.108168	["ENSG00000080824","ENSG00000100764","ENSG00000101182","ENSG00000103035","ENSG00000108671","ENSG00000109971","ENSG00000115233","ENSG00000173692","ENSG00000197170"]	["HSP90AA1","HSPA8","PSMA7","PSMC1","PSMD1","PSMD11","PSMD12","PSMD14","PSMD7"]
CH000000711	TGFbeta pathway	29	145	18.8418	0.00915274	0.1122	["ENSG00000004897","ENSG00000065150","ENSG00000083312","ENSG00000100030","ENSG00000100393","ENSG00000100644","ENSG00000100764","ENSG00000101182","ENSG00000101966","ENSG00000103035","ENSG00000108424","ENSG00000108671","ENSG00000109332","ENSG00000113658","ENSG00000115233","ENSG00000115904","ENSG00000132341","ENSG00000133703","ENSG00000136603","ENSG00000137693","ENSG00000157077","ENSG00000170365","E…	["CDC27","EP300","HDAC2","HIF1A","IPO5","JUN","KPNB1","KRAS","MAPK1","NRAS","PAK2","PSMA7","PSMC1","PSMD1","PSMD11","PSMD12","PSMD14","PSMD7","RAN","SKIL","SMAD1","SMAD2","SMAD5","SOS1","TNPO1","UBE2D3","XIAP","YAP1","ZFYVE9"]
CH000004446	TNFR1 signaling	11	40	5.19774	0.0103689	0.124954	["ENSG00000055130","ENSG00000100387","ENSG00000100764","ENSG00000101182","ENSG00000103035","ENSG00000108671","ENSG00000109332","ENSG00000113558","ENSG00000115233","ENSG00000173692","ENSG00000197170"]	["CUL1","PSMA7","PSMC1","PSMD1","PSMD11","PSMD12","PSMD14","PSMD7","RBX1","SKP1","UBE2D3"]
CH000000864	Htt degradation	8	25	3.24859	0.010807	0.125963	["ENSG00000078140","ENSG00000100764","ENSG00000101182","ENSG00000103035","ENSG00000108671","ENSG00000115233","ENSG00000173692","ENSG00000197170"]	["PSMA7","PSMC1","PSMD1","PSMD11","PSMD12","PSMD14","PSMD7","UBE2K"]
CH000004506	IL_5 pathway	8	25	3.24859	0.010807	0.125963	["ENSG00000100030","ENSG00000115415","ENSG00000115904","ENSG00000124766","ENSG00000133703","ENSG00000137575","ENSG00000213281","ENSG00000254087"]	["KRAS","LYN","MAPK1","NRAS","SDCBP","SOS1","SOX4","STAT1"]
CH000004615	ANG-1 ---/ FOXO1A	6	16	2.0791	0.0117057	0.134238	["ENSG00000108953","ENSG00000128245","ENSG00000134308","ENSG00000164924","ENSG00000166913","ENSG00000170027"]	["YWHAB","YWHAE (ENSG00000108953)","YWHAG","YWHAH","YWHAQ","YWHAZ"]
CH000004390	NICD1 ---> RBPJK (CBF1)	5	12	1.55932	0.0130185	0.146923	["ENSG00000100393","ENSG00000100603","ENSG00000138433","ENSG00000168214","ENSG00000196591"]	["CIR1","EP300","HDAC2","RBPJ","SNW1"]
CH000000838	p53 degradation	8	26	3.37853	0.0138969	0.149708	["ENSG00000100764","ENSG00000101182","ENSG00000103035","ENSG00000108671","ENSG00000109332","ENSG00000115233","ENSG00000173692","ENSG00000197170"]	["PSMA7","PSMC1","PSMD1","PSMD11","PSMD12","PSMD14","PSMD7","UBE2D3"]
CH000000914	Nrdp1 ---/ apollon	8	26	3.37853	0.0138969	0.149708	["ENSG00000100764","ENSG00000101182","ENSG00000103035","ENSG00000108671","ENSG00000109332","ENSG00000115233","ENSG00000173692","ENSG00000197170"]	["PSMA7","PSMC1","PSMD1","PSMD11","PSMD12","PSMD14","PSMD7","UBE2D3"]
CH000000985	E1 ---PIRH2---/ p53	8	26	3.37853	0.0138969	0.149708	["ENSG00000100764","ENSG00000101182","ENSG00000103035","ENSG00000108671","ENSG00000109332","ENSG00000115233","ENSG00000173692","ENSG00000197170"]	["PSMA7","PSMC1","PSMD1","PSMD11","PSMD12","PSMD14","PSMD7","UBE2D3"]
CH000000683	cyclosome ---/ SnoN	10	37	4.80791	0.0161978	0.16393	["ENSG00000004897","ENSG00000100764","ENSG00000101182","ENSG00000103035","ENSG00000108671","ENSG00000109332","ENSG00000115233","ENSG00000136603","ENSG00000173692","ENSG00000197170"]	["CDC27","PSMA7","PSMC1","PSMD1","PSMD11","PSMD12","PSMD14","PSMD7","SKIL","UBE2D3"]
CH000000187	Lyn ---> APS:Fyn	2	2	0.259887	0.0168321	0.16393	["ENSG00000010810","ENSG00000254087"]	["FYN","LYN"]
CH000004601	YAP ---> CTGF	2	2	0.259887	0.0168321	0.16393	["ENSG00000137693","ENSG00000187079"]	["TEAD1","YAP1"]
CH000000851	JNK pathway	17	77	10.0056	0.0169573	0.16393	["ENSG00000008294","ENSG00000085511","ENSG00000100387","ENSG00000100764","ENSG00000101182","ENSG00000103035","ENSG00000108671","ENSG00000109670","ENSG00000111266","ENSG00000115233","ENSG00000136810","ENSG00000142192","ENSG00000164924","ENSG00000173692","ENSG00000177606","ENSG00000197170","ENSG00000198900"]	["APP","DUSP16 (ENSG00000111266)","FBXW7","JUN","MAP3K4","PSMA7","PSMC1","PSMD1","PSMD11","PSMD12","PSMD14","PSMD7","RBX1","SPAG9","TOP1","TXN","YWHAZ"]
CH000004578	cofilin-1 degradation	7	22	2.85876	0.0174371	0.16393	["ENSG00000100764","ENSG00000101182","ENSG00000103035","ENSG00000108671","ENSG00000115233","ENSG00000173692","ENSG00000197170"]	["PSMA7","PSMC1","PSMD1","PSMD11","PSMD12","PSMD14","PSMD7"]
CH000000120	Cul-1, beta-TrCP2, Roc1, Skp1, IkappaB-alpha complex formation	3	5	0.649718	0.0177533	0.16393	["ENSG00000055130","ENSG00000100387","ENSG00000113558"]	["CUL1","RBX1","SKP1"]
CH000000670	Trx1 ---> HIF-1alpha	3	5	0.649718	0.0177533	0.16393	["ENSG00000100644","ENSG00000136810","ENSG00000198431"]	["HIF1A","TXN","TXNRD1"]
CH000003565	Plk1 ---> Bub1	3	5	0.649718	0.0177533	0.16393	["ENSG00000157456","ENSG00000169679","ENSG00000170312"]	["BUB1","CCNB2","CDK1"]
CH000003881	Pin1 ---> APP	3	5	0.649718	0.0177533	0.16393	["ENSG00000142192","ENSG00000157456","ENSG00000170312"]	["APP","CCNB2","CDK1"]
CH000004419	estradiol ---> E2F1	3	5	0.649718	0.0177533	0.16393	["ENSG00000005339","ENSG00000124151","ENSG00000156802"]	["ATAD2","CREBBP","NCOA3"]
CH000004645	Ras processing	3	5	0.649718	0.0177533	0.16393	["ENSG00000116237","ENSG00000133703","ENSG00000213281"]	["ICMT","KRAS","NRAS"]
CH000004525	diacyl lipopeptide, TLR2	11	43	5.58757	0.0180495	0.164528	["ENSG00000055130","ENSG00000100387","ENSG00000100764","ENSG00000101182","ENSG00000103035","ENSG00000108671","ENSG00000109332","ENSG00000113558","ENSG00000115233","ENSG00000173692","ENSG00000197170"]	["CUL1","PSMA7","PSMC1","PSMD1","PSMD11","PSMD12","PSMD14","PSMD7","RBX1","SKP1","UBE2D3"]
CH000000722	EGF pathway	25	127	16.5028	0.0184255	0.165829	["ENSG00000011405","ENSG00000069956","ENSG00000078304","ENSG00000085832","ENSG00000097033","ENSG00000100030","ENSG00000100393","ENSG00000111229","ENSG00000113575","ENSG00000115091","ENSG00000115415","ENSG00000115904","ENSG00000116237","ENSG00000133703","ENSG00000138071","ENSG00000141367","ENSG00000147010","ENSG00000157557","ENSG00000160007","ENSG00000163466","ENSG00000164924","ENSG00000168374","E…	["ACTR2","ACTR3","ARF4","ARHGAP35","ARPC1A","ARPC2","ARPC3","CLTC","EP300","EPS15","ETS2","ICMT","KRAS","MAPK1","MAPK6","NRAS","PIK3C2A","PPP2CA","PPP2R5C","SH3GLB1","SH3KBP1","SMAD2","SOS1","STAT1","YWHAZ"]
CH000000772	TNF-alpha pathway	20	96	12.4746	0.0187805	0.166912	["ENSG00000005339","ENSG00000055130","ENSG00000100387","ENSG00000100393","ENSG00000100764","ENSG00000101182","ENSG00000102753","ENSG00000103035","ENSG00000108671","ENSG00000109332","ENSG00000113558","ENSG00000115233","ENSG00000129315","ENSG00000132475","ENSG00000136810","ENSG00000163041","ENSG00000172115","ENSG00000173692","ENSG00000177606","ENSG00000197170"]	["CCNT1","CREBBP","CUL1","CYCS","EP300","H3-3A","H3-3B","JUN","KPNA3","PSMA7","PSMC1","PSMD1","PSMD11","PSMD12","PSMD14","PSMD7","RBX1","SKP1","TXN","UBE2D3"]
CH000004526	autophagy	12	49	6.36723	0.0194304	0.169384	["ENSG00000023287","ENSG00000100387","ENSG00000108953","ENSG00000128245","ENSG00000134308","ENSG00000140941","ENSG00000145782","ENSG00000154582","ENSG00000164924","ENSG00000165699","ENSG00000166913","ENSG00000170027"]	["ATG12","ELOC","MAP1LC3B","RB1CC1","RBX1","TSC1","YWHAB","YWHAE (ENSG00000108953)","YWHAG","YWHAH","YWHAQ","YWHAZ"]
CH000003886	cyclinB1 ubiquitination ---> anaphase onset	10	38	4.93785	0.0195351	0.169384	["ENSG00000004897","ENSG00000100764","ENSG00000101182","ENSG00000103035","ENSG00000108671","ENSG00000115233","ENSG00000156970","ENSG00000164109","ENSG00000173692","ENSG00000197170"]	["BUB1B","CDC27","MAD2L1","PSMA7","PSMC1","PSMD1","PSMD11","PSMD12","PSMD14","PSMD7"]
CH000000455	CaM ---/ dynamin-1	4	9	1.16949	0.0206159	0.172446	["ENSG00000138814","ENSG00000143933","ENSG00000198668","ENSG00000221823"]	["CALM1","CALM2","PPP3CA","PPP3R1"]
CH000004326	biosynthesis of saturated and n - 9 series of MUFA and PUFA	4	9	1.16949	0.0206159	0.172446	["ENSG00000012660","ENSG00000099194","ENSG00000149485","ENSG00000170522"]	["ELOVL5","ELOVL6","FADS1","SCD"]
CH000004575	SSH1L ---> cofilin	4	9	1.16949	0.0206159	0.172446	["ENSG00000084112","ENSG00000138814","ENSG00000164924","ENSG00000221823"]	["PPP3CA","PPP3R1","SSH1","YWHAZ"]
CH000003415	Mdm2 ---> p/CAF	7	23	2.9887	0.0223596	0.184857	["ENSG00000100764","ENSG00000101182","ENSG00000103035","ENSG00000108671","ENSG00000115233","ENSG00000173692","ENSG00000197170"]	["PSMA7","PSMC1","PSMD1","PSMD11","PSMD12","PSMD14","PSMD7"]
CH000000955	E1 ---/ alpha-synuclein	7	24	3.11864	0.0281667	0.227574	["ENSG00000100764","ENSG00000101182","ENSG00000103035","ENSG00000108671","ENSG00000115233","ENSG00000173692","ENSG00000197170"]	["PSMA7","PSMC1","PSMD1","PSMD11","PSMD12","PSMD14","PSMD7"]
CH000001001	Plk1 activation and substrates	7	24	3.11864	0.0281667	0.227574	["ENSG00000065613","ENSG00000117632","ENSG00000133112","ENSG00000137807","ENSG00000157456","ENSG00000158402","ENSG00000170312"]	["CCNB2","CDC25C","CDK1","KIF23","SLK","STMN1","TPT1"]
CH000000689	G1 phase (Cdk4)	9	35	4.54802	0.0302796	0.241897	["ENSG00000112242","ENSG00000114126","ENSG00000118971","ENSG00000138814","ENSG00000143933","ENSG00000165891","ENSG00000198176","ENSG00000198668","ENSG00000221823"]	["CALM1","CALM2","CCND2","E2F3","E2F7","PPP3CA","PPP3R1","TFDP1","TFDP2"]
CH000004591	N-cadherin:beta-catenin, homophilic ligation	3	6	0.779661	0.0321259	0.251006	["ENSG00000168036","ENSG00000170558","ENSG00000198561"]	["CDH2","CTNNB1","CTNND1"]
CH000004679	Slim ---/ HIF-1alpha	3	6	0.779661	0.0321259	0.251006	["ENSG00000005339","ENSG00000100393","ENSG00000100644"]	["CREBBP","EP300","HIF1A"]
CH000000758	stress-associated pathways	21	108	14.0339	0.0335526	0.259303	["ENSG00000008294","ENSG00000085511","ENSG00000089022","ENSG00000100030","ENSG00000100387","ENSG00000100764","ENSG00000101182","ENSG00000103035","ENSG00000108671","ENSG00000109670","ENSG00000111266","ENSG00000115233","ENSG00000136810","ENSG00000139318","ENSG00000142192","ENSG00000151247","ENSG00000160551","ENSG00000164924","ENSG00000173692","ENSG00000177606","ENSG00000197170"]	["APP","DUSP16 (ENSG00000111266)","DUSP6","EIF4E","FBXW7","JUN","MAP3K4","MAPK1","MAPKAPK5","PSMA7","PSMC1","PSMD1","PSMD11","PSMD12","PSMD14","PSMD7","RBX1","SPAG9","TAOK1","TXN","YWHAZ"]
CH000000756	OSM pathway	7	25	3.24859	0.0349178	0.260493	["ENSG00000033800","ENSG00000069956","ENSG00000100030","ENSG00000115415","ENSG00000115904","ENSG00000133703","ENSG00000213281"]	["KRAS","MAPK1","MAPK6","NRAS","PIAS1","SOS1","STAT1"]
CH000003412	Akt-1 ---Mdm2---> AR	7	25	3.24859	0.0349178	0.260493	["ENSG00000100764","ENSG00000101182","ENSG00000103035","ENSG00000108671","ENSG00000115233","ENSG00000173692","ENSG00000197170"]	["PSMA7","PSMC1","PSMD1","PSMD11","PSMD12","PSMD14","PSMD7"]
CH000004434	NIK degradation	7	25	3.24859	0.0349178	0.260493	["ENSG00000100764","ENSG00000101182","ENSG00000103035","ENSG00000108671","ENSG00000115233","ENSG00000173692","ENSG00000197170"]	["PSMA7","PSMC1","PSMD1","PSMD11","PSMD12","PSMD14","PSMD7"]
CH000000677	15d-PGJ2 ---> PPAR-gamma	5	15	1.94915	0.0355385	0.260493	["ENSG00000005339","ENSG00000054118","ENSG00000100393","ENSG00000108510","ENSG00000125686"]	["CREBBP","EP300","MED1","MED13","THRAP3"]
CH000004577	Rac1 ---p65PAK---> Arp2/3 complex	5	15	1.94915	0.0355385	0.260493	["ENSG00000111229","ENSG00000115091","ENSG00000138071","ENSG00000163466","ENSG00000241685"]	["ACTR2","ACTR3","ARPC1A","ARPC2","ARPC3"]
CH000000719	AhR pathway	6	20	2.59887	0.0361719	0.262431	["ENSG00000080824","ENSG00000082898","ENSG00000100393","ENSG00000100644","ENSG00000110958","ENSG00000124151"]	["EP300","HIF1A","HSP90AA1","NCOA3","PTGES3","XPO1"]
CH000004594	N-cadherin ---Eplin---> actin	4	11	1.42938	0.0437343	0.299729	["ENSG00000050405","ENSG00000168036","ENSG00000170558","ENSG00000198561"]	["CDH2","CTNNB1","CTNND1","LIMA1"]
CH000000937	PRL ---Src,FAK1---> ERK	6	21	2.72881	0.045308	0.299729	["ENSG00000069956","ENSG00000100030","ENSG00000115904","ENSG00000133703","ENSG00000169398","ENSG00000213281"]	["KRAS","MAPK1","MAPK6","NRAS","PTK2","SOS1"]
CH000004587	WAVE2 ---> Arp2/3 complex	6	21	2.72881	0.045308	0.299729	["ENSG00000061676","ENSG00000111229","ENSG00000115091","ENSG00000138071","ENSG00000163466","ENSG00000241685"]	["ACTR2","ACTR3","ARPC1A","ARPC2","ARPC3","NCKAP1"]
CH000000022	Cdc42 ---/ stathmin	2	3	0.389831	0.0461494	0.299729	["ENSG00000070831","ENSG00000117632"]	["CDC42","STMN1"]
CH000000066	RhoA ---/ MLCP	2	3	0.389831	0.0461494	0.299729	["ENSG00000058272","ENSG00000134318"]	["PPP1R12A","ROCK2"]
CH000000068	ROCK-II ---> moesin	2	3	0.389831	0.0461494	0.299729	["ENSG00000058272","ENSG00000134318"]	["PPP1R12A","ROCK2"]
CH000000669	MEK-1 ---> HIF-1alpha	2	3	0.389831	0.0461494	0.299729	["ENSG00000100030","ENSG00000100644"]	["HIF1A","MAPK1"]
CH000001027	TopoI ---> c-Jun ---> ErbB1	2	3	0.389831	0.0461494	0.299729	["ENSG00000177606","ENSG00000198900"]	["JUN","TOP1"]
CH000003413	p300 ---> c-myc ---> TERT	2	3	0.389831	0.0461494	0.299729	["ENSG00000100393","ENSG00000125952"]	["EP300","MAX"]
CH000003552	SUMO-1 ---> Daxx ---/ CBP	2	3	0.389831	0.0461494	0.299729	["ENSG00000005339","ENSG00000196591"]	["CREBBP","HDAC2"]
CH000004330	oleic acid ---> meadic acid	2	3	0.389831	0.0461494	0.299729	["ENSG00000012660","ENSG00000149485"]	["ELOVL5","FADS1"]
CH000004200	MAD2 ---Cdc20---> cyclosome	5	16	2.0791	0.0463716	0.299729	["ENSG00000004897","ENSG00000154473","ENSG00000156970","ENSG00000164109","ENSG00000169679"]	["BUB1","BUB1B","BUB3","CDC27","MAD2L1"]
CH000000752	Rac1 pathway	14	68	8.83616	0.0497967	0.318968	["ENSG00000061676","ENSG00000085511","ENSG00000101367","ENSG00000111229","ENSG00000115091","ENSG00000137267","ENSG00000138071","ENSG00000140575","ENSG00000147202","ENSG00000163466","ENSG00000166579","ENSG00000167552","ENSG00000177606","ENSG00000241685"]	["ACTR2","ACTR3","ARPC1A","ARPC2","ARPC3","DIAPH2","IQGAP1","JUN","MAP3K4","MAPRE1","NCKAP1","NDEL1","TUBA1A","TUBB2A"]
CH000000889	Fer ---> beta-catenin{Tyr142}	3	7	0.909605	0.050906	0.320819	["ENSG00000010810","ENSG00000168036","ENSG00000198561"]	["CTNNB1","CTNND1","FYN"]
CH000000682	Smurf-1 ---/ Smad7, TGFbetaR-I	7	27	3.50847	0.0514393	0.320819	["ENSG00000100764","ENSG00000101182","ENSG00000103035","ENSG00000108671","ENSG00000115233","ENSG00000173692","ENSG00000197170"]	["PSMA7","PSMC1","PSMD1","PSMD11","PSMD12","PSMD14","PSMD7"]
CH000000712	PPAR pathway	7	27	3.50847	0.0514393	0.320819	["ENSG00000005339","ENSG00000054118","ENSG00000100393","ENSG00000108510","ENSG00000108946","ENSG00000114302","ENSG00000125686"]	["CREBBP","EP300","MED1","MED13","PRKAR1A","PRKAR2A","THRAP3"]
CH000004209	securin degradation	9	39	5.0678	0.0571412	0.353063	["ENSG00000004897","ENSG00000100764","ENSG00000101182","ENSG00000103035","ENSG00000108671","ENSG00000115233","ENSG00000170312","ENSG00000173692","ENSG00000197170"]	["CDC27","CDK1","PSMA7","PSMC1","PSMD1","PSMD11","PSMD12","PSMD14","PSMD7"]
CH000004510	IL-5 ---> ERK	5	17	2.20904	0.0589588	0.353063	["ENSG00000100030","ENSG00000115904","ENSG00000133703","ENSG00000137575","ENSG00000213281"]	["KRAS","MAPK1","NRAS","SDCBP","SOS1"]
CH000004634	TGFbetaR_I _> ERK	5	17	2.20904	0.0589588	0.353063	["ENSG00000100030","ENSG00000115904","ENSG00000133703","ENSG00000175387","ENSG00000213281"]	["KRAS","MAPK1","NRAS","SMAD2","SOS1"]
CH000000580	Fam ---> beta-catenin	4	12	1.55932	0.0590921	0.353063	["ENSG00000055130","ENSG00000113558","ENSG00000113712","ENSG00000168036"]	["CSNK1A1","CTNNB1","CUL1","SKP1"]
CH000004593	N-cadherin network	4	12	1.55932	0.0590921	0.353063	["ENSG00000050405","ENSG00000168036","ENSG00000170558","ENSG00000198561"]	["CDH2","CTNNB1","CTNND1","LIMA1"]
CH000004205	cyclosome ---> Nek2A	8	34	4.41808	0.0643062	0.377865	["ENSG00000004897","ENSG00000100764","ENSG00000101182","ENSG00000103035","ENSG00000108671","ENSG00000115233","ENSG00000173692","ENSG00000197170"]	["CDC27","PSMA7","PSMC1","PSMD1","PSMD11","PSMD12","PSMD14","PSMD7"]
CH000004207	Fzr1 ---> cyclin B1 degradation	8	34	4.41808	0.0643062	0.377865	["ENSG00000004897","ENSG00000100764","ENSG00000101182","ENSG00000103035","ENSG00000108671","ENSG00000115233","ENSG00000173692","ENSG00000197170"]	["CDC27","PSMA7","PSMC1","PSMD1","PSMD11","PSMD12","PSMD14","PSMD7"]
CH000004613	Angiopoietin/Tie signaling	6	23	2.9887	0.0675477	0.393659	["ENSG00000108953","ENSG00000128245","ENSG00000134308","ENSG00000164924","ENSG00000166913","ENSG00000170027"]	["YWHAB","YWHAE (ENSG00000108953)","YWHAG","YWHAH","YWHAQ","YWHAZ"]
CH000000769	wnt pathway	12	59	7.66667	0.0719498	0.415905	["ENSG00000055130","ENSG00000100764","ENSG00000101182","ENSG00000103035","ENSG00000108671","ENSG00000113558","ENSG00000113712","ENSG00000115233","ENSG00000155760","ENSG00000168036","ENSG00000173692","ENSG00000197170"]	["CSNK1A1","CTNNB1","CUL1","FZD7","PSMA7","PSMC1","PSMD1","PSMD11","PSMD12","PSMD14","PSMD7","SKP1"]
CH000003550	sumoylation pathway	3	8	1.03955	0.0738075	0.416485	["ENSG00000005339","ENSG00000033800","ENSG00000196591"]	["CREBBP","HDAC2","PIAS1"]
CH000003817	L-ornithine ---> succinate	3	8	1.03955	0.0738075	0.416485	["ENSG00000102172","ENSG00000115758","ENSG00000123505"]	["AMD1","ODC1","SMS"]
CH000003818	polyamine metabolism	3	8	1.03955	0.0738075	0.416485	["ENSG00000102172","ENSG00000115758","ENSG00000123505"]	["AMD1","ODC1","SMS"]
CH000000657	insulin ---IRS---> PRK2, SHP-2, MAPK cascade	4	13	1.68927	0.0769321	0.420759	["ENSG00000065243","ENSG00000115904","ENSG00000133703","ENSG00000213281"]	["KRAS","NRAS","PKN2","SOS1"]
CH000004104	BDNF ---trkB---> MAPK cascade	4	13	1.68927	0.0769321	0.420759	["ENSG00000100030","ENSG00000115904","ENSG00000133703","ENSG00000213281"]	["KRAS","MAPK1","NRAS","SOS1"]
CH000004294	NT-3 ---trkC---> Erk	4	13	1.68927	0.0769321	0.420759	["ENSG00000100030","ENSG00000115904","ENSG00000133703","ENSG00000213281"]	["KRAS","MAPK1","NRAS","SOS1"]
CH000004484	KSR scaffold complex	4	13	1.68927	0.0769321	0.420759	["ENSG00000113575","ENSG00000133703","ENSG00000164924","ENSG00000213281"]	["KRAS","NRAS","PPP2CA","YWHAZ"]
CH000004341	ER-alpha pathway	12	60	7.79661	0.0799465	0.425815	["ENSG00000005339","ENSG00000012048","ENSG00000044574","ENSG00000080824","ENSG00000100393","ENSG00000109332","ENSG00000109971","ENSG00000124151","ENSG00000132475","ENSG00000156802","ENSG00000163041","ENSG00000170606"]	["ATAD2","BRCA1","CREBBP","EP300","H3-3A","H3-3B","HSP90AA1","HSPA4","HSPA5","HSPA8","NCOA3","UBE2D3"]
CH000000586	ZAP-70 ---> Elk-1	6	24	3.11864	0.0806747	0.425815	["ENSG00000010810","ENSG00000069956","ENSG00000100030","ENSG00000115904","ENSG00000133703","ENSG00000213281"]	["FYN","KRAS","MAPK1","MAPK6","NRAS","SOS1"]
CH000000065	CaM ---> MLC	2	4	0.519774	0.0844443	0.425815	["ENSG00000143933","ENSG00000198668"]	["CALM1","CALM2"]
CH000000232	TEBP, Hsp90, PKR, dsRNA complex formation	2	4	0.519774	0.0844443	0.425815	["ENSG00000080824","ENSG00000110958"]	["HSP90AA1","PTGES3"]
CH000000401	InsR ---> Sos	2	4	0.519774	0.0844443	0.425815	["ENSG00000095637","ENSG00000115904"]	["SORBS1","SOS1"]
CH000000599	beta-catenin:E-cadherin complex phosphorylation and dissociation	2	4	0.519774	0.0844443	0.425815	["ENSG00000168036","ENSG00000198561"]	["CTNNB1","CTNND1"]
CH000000891	Caspase-6 ---> Caspase-3	2	4	0.519774	0.0844443	0.425815	["ENSG00000115541","ENSG00000144381"]	["HSPD1","HSPE1"]
CH000000949	iNOS ---> NO	2	4	0.519774	0.0844443	0.425815	["ENSG00000143933","ENSG00000198668"]	["CALM1","CALM2"]
CH000003643	choline ---> lecithin	2	4	0.519774	0.0844443	0.425815	["ENSG00000110721","ENSG00000161217"]	["CHKA","PCYT1A"]
CH000004328	palmitic acid ---> paullinic acid	2	4	0.519774	0.0844443	0.425815	["ENSG00000099194","ENSG00000170522"]	["ELOVL6","SCD"]
CH000004610	Sox9 ---Smad3---> COL2A1	2	4	0.519774	0.0844443	0.425815	["ENSG00000100393","ENSG00000175387"]	["EP300","SMAD2"]
CH000000994	EGF ---> actin polymerization	4	14	1.81921	0.0971357	0.47276	["ENSG00000111229","ENSG00000115091","ENSG00000138071","ENSG00000163466"]	["ACTR2","ACTR3","ARPC2","ARPC3"]
CH000004502	leptin --->ERK	4	14	1.81921	0.0971357	0.47276	["ENSG00000100030","ENSG00000115904","ENSG00000133703","ENSG00000213281"]	["KRAS","MAPK1","NRAS","SOS1"]
CH000004644	c-Ets-2, repressive complex	4	14	1.81921	0.0971357	0.47276	["ENSG00000015171","ENSG00000141027","ENSG00000157557","ENSG00000196591"]	["ETS2","HDAC2","NCOR1","ZMYND11"]
CH000000500	CaMKII-alpha ---> Rac1	3	9	1.16949	0.100403	0.47276	["ENSG00000158528","ENSG00000186298","ENSG00000213639"]	["PPP1CB","PPP1CC","PPP1R9A"]
CH000000718	HIF-1alpha ---/ AhR	3	9	1.16949	0.100403	0.47276	["ENSG00000080824","ENSG00000100644","ENSG00000110958"]	["HIF1A","HSP90AA1","PTGES3"]
CH000003577	alpha-D-Ribose 5-phosphate ---> inosine 5'-phosphate	3	9	1.16949	0.100403	0.47276	["ENSG00000128050","ENSG00000128059","ENSG00000159131"]	["GART (ENSG00000159131)","PAICS","PPAT"]
CH000003656	synthesis of purine ribonucleotides	3	9	1.16949	0.100403	0.47276	["ENSG00000128050","ENSG00000128059","ENSG00000159131"]	["GART (ENSG00000159131)","PAICS","PPAT"]
CH000004243	estradiol ---> ER-alpha (NR3A1)	3	9	1.16949	0.100403	0.47276	["ENSG00000044574","ENSG00000080824","ENSG00000170606"]	["HSP90AA1","HSPA4","HSPA5"]
CH000004595	E-cadherin ---Eplin---> actin	3	9	1.16949	0.100403	0.47276	["ENSG00000050405","ENSG00000168036","ENSG00000198561"]	["CTNNB1","CTNND1","LIMA1"]
CH000004602	TAZ dephosphorylation	3	9	1.16949	0.100403	0.47276	["ENSG00000158528","ENSG00000186298","ENSG00000213639"]	["PPP1CB","PPP1CC","PPP1R9A"]
CH000000639	PDGF A ---> ERK	5	20	2.59887	0.107103	0.476236	["ENSG00000069956","ENSG00000100030","ENSG00000115904","ENSG00000133703","ENSG00000213281"]	["KRAS","MAPK1","MAPK6","NRAS","SOS1"]
CH000000640	PDGF B ---> ERK	5	20	2.59887	0.107103	0.476236	["ENSG00000069956","ENSG00000100030","ENSG00000115904","ENSG00000133703","ENSG00000213281"]	["KRAS","MAPK1","MAPK6","NRAS","SOS1"]
CH000004570	ErbB1 ---Sos1, H-Ras---> Rac activation	5	20	2.59887	0.107103	0.476236	["ENSG00000069956","ENSG00000100030","ENSG00000115904","ENSG00000133703","ENSG00000213281"]	["KRAS","MAPK1","MAPK6","NRAS","SOS1"]
CH000000753	B-cell antigen receptor pathway	12	63	8.18644	0.107202	0.476236	["ENSG00000069956","ENSG00000085511","ENSG00000100030","ENSG00000115904","ENSG00000133703","ENSG00000138814","ENSG00000143933","ENSG00000177606","ENSG00000198668","ENSG00000213281","ENSG00000221823","ENSG00000254087"]	["CALM1","CALM2","JUN","KRAS","LYN","MAP3K4","MAPK1","MAPK6","NRAS","PPP3CA","PPP3R1","SOS1"]
CH000000767	Notch pathway	7	32	4.15819	0.111368	0.476236	["ENSG00000100393","ENSG00000100603","ENSG00000100811","ENSG00000138433","ENSG00000151694","ENSG00000168214","ENSG00000196591"]	["ADAM17","CIR1","EP300","HDAC2","RBPJ","SNW1","YY1"]
CH000004191	ErbB3 ---> survival	10	51	6.62712	0.115943	0.476236	["ENSG00000100030","ENSG00000108953","ENSG00000109332","ENSG00000115904","ENSG00000128245","ENSG00000134308","ENSG00000137693","ENSG00000164924","ENSG00000166913","ENSG00000170027"]	["MAPK1","SOS1","UBE2D3","YAP1","YWHAB","YWHAE (ENSG00000108953)","YWHAG","YWHAH","YWHAQ","YWHAZ"]
CH000004252	NGF ---TrkA---> Elk-1	4	15	1.94915	0.119535	0.476236	["ENSG00000100030","ENSG00000115904","ENSG00000133703","ENSG00000213281"]	["KRAS","MAPK1","NRAS","SOS1"]
CH000000750	Insulin pathway	15	84	10.9153	0.119834	0.476236	["ENSG00000049759","ENSG00000065243","ENSG00000069956","ENSG00000095637","ENSG00000100030","ENSG00000115904","ENSG00000133703","ENSG00000137154","ENSG00000151247","ENSG00000158528","ENSG00000165699","ENSG00000166913","ENSG00000186298","ENSG00000213281","ENSG00000213639"]	["EIF4E","KRAS","MAPK1","MAPK6","NEDD4L","NRAS","PKN2","PPP1CB","PPP1CC","PPP1R9A","RPS6","SORBS1","SOS1","TSC1","YWHAB"]
CH000004521	TLR2_mediated signaling	11	58	7.53672	0.122646	0.476236	["ENSG00000055130","ENSG00000100387","ENSG00000100764","ENSG00000101182","ENSG00000103035","ENSG00000108671","ENSG00000109332","ENSG00000113558","ENSG00000115233","ENSG00000173692","ENSG00000197170"]	["CUL1","PSMA7","PSMC1","PSMD1","PSMD11","PSMD12","PSMD14","PSMD7","RBX1","SKP1","UBE2D3"]
CH000000987	hypoxia pathways	5	21	2.72881	0.126414	0.476236	["ENSG00000005339","ENSG00000100393","ENSG00000100644","ENSG00000136810","ENSG00000198431"]	["CREBBP","EP300","HIF1A","TXN","TXNRD1"]
CH000000968	PI3K ---Mdm2---/ p53	7	33	4.28814	0.126511	0.476236	["ENSG00000100764","ENSG00000101182","ENSG00000103035","ENSG00000108671","ENSG00000115233","ENSG00000173692","ENSG00000197170"]	["PSMA7","PSMC1","PSMD1","PSMD11","PSMD12","PSMD14","PSMD7"]
CH000000656	Insulin ---Shc---> MAPK cascade	6	27	3.50847	0.127841	0.476236	["ENSG00000069956","ENSG00000100030","ENSG00000115904","ENSG00000133703","ENSG00000137154","ENSG00000213281"]	["KRAS","MAPK1","MAPK6","NRAS","RPS6","SOS1"]
CH000000002	Cdc42 ---/ cofilin	2	5	0.649718	0.128905	0.476236	["ENSG00000070831","ENSG00000143776"]	["CDC42","CDC42BPA"]
CH000000331	protein tyrosine kinases ---> alpha-catenin1:beta-catenin:E-cadherin:plakoglobin:p120CAS	2	5	0.649718	0.128905	0.476236	["ENSG00000168036","ENSG00000198561"]	["CTNNB1","CTNND1"]
CH000000396	HATs ---> STAT6:H3R	2	5	0.649718	0.128905	0.476236	["ENSG00000005339","ENSG00000100393"]	["CREBBP","EP300"]
CH000000707	DNA-PK ---> p53	2	5	0.649718	0.128905	0.476236	["ENSG00000079246","ENSG00000253729"]	["PRKDC","XRCC5"]
CH000000913	Caspase-7 ---/ Rad21	2	5	0.649718	0.128905	0.476236	["ENSG00000164754","ENSG00000172115"]	["CYCS","RAD21"]
CH000000948	NOS ---/ parkin	2	5	0.649718	0.128905	0.476236	["ENSG00000143933","ENSG00000198668"]	["CALM1","CALM2"]
CH000000993	YY1 ---/ p300	2	5	0.649718	0.128905	0.476236	["ENSG00000100393","ENSG00000100811"]	["EP300","YY1"]
CH000003619	D-glycerol ---> 2-phospho-D-glycerate	2	5	0.649718	0.128905	0.476236	["ENSG00000072210","ENSG00000164904"]	["ALDH3A2","ALDH7A1"]
CH000003625	pyruvate ---> L-lactate	2	5	0.649718	0.128905	0.476236	["ENSG00000111716","ENSG00000134333"]	["LDHA (ENSG00000134333)","LDHB"]
CH000003653	L-lactate ---> pyruvate	2	5	0.649718	0.128905	0.476236	["ENSG00000111716","ENSG00000134333"]	["LDHA (ENSG00000134333)","LDHB"]
CH000004331	biosynthesis of n - 6 and n - 3 series of PUFA	2	5	0.649718	0.128905	0.476236	["ENSG00000012660","ENSG00000149485"]	["ELOVL5","FADS1"]
CH000004332	linoleic acid ---> docasapentaenoic acid	2	5	0.649718	0.128905	0.476236	["ENSG00000012660","ENSG00000149485"]	["ELOVL5","FADS1"]
CH000004333	alpha-linolenic acid ---> docosahexaenic acid	2	5	0.649718	0.128905	0.476236	["ENSG00000012660","ENSG00000149485"]	["ELOVL5","FADS1"]
CH000004589	Rac1 ---> DIAPH2	2	5	0.649718	0.128905	0.476236	["ENSG00000061676","ENSG00000147202"]	["DIAPH2","NCKAP1"]
CH000004660	TGFbeta1 ---> NOS3	2	5	0.649718	0.128905	0.476236	["ENSG00000157077","ENSG00000175387"]	["SMAD2","ZFYVE9"]
CH000004700	15-Keto-PGE2 ---> TP63	2	5	0.649718	0.128905	0.476236	["ENSG00000157077","ENSG00000175387"]	["SMAD2","ZFYVE9"]
CH000004720	Endothelin-1 gene regulation	2	5	0.649718	0.128905	0.476236	["ENSG00000100393","ENSG00000177606"]	["EP300","JUN"]
CH000000103	SHP-1 ---> p120CAS	1	1	0.129944	0.129944	0.476236	["ENSG00000198561"]	["CTNND1"]
CH000000104	p120CAS, SHP-1 complex formation	1	1	0.129944	0.129944	0.476236	["ENSG00000198561"]	["CTNND1"]
CH000000105	FAM ---> Af6	1	1	0.129944	0.129944	0.476236	["ENSG00000130396"]	["AFDN"]
CH000000107	Smad2-L degradation	1	1	0.129944	0.129944	0.476236	["ENSG00000175387"]	["SMAD2"]
CH000000183	Jak2 ---> APS:Fyn	1	1	0.129944	0.129944	0.476236	["ENSG00000010810"]	["FYN"]
CH000000184	Lyn ---> APS:Jak2	1	1	0.129944	0.129944	0.476236	["ENSG00000254087"]	["LYN"]
CH000000185	Lyn ---> APS:Jak3	1	1	0.129944	0.129944	0.476236	["ENSG00000254087"]	["LYN"]
CH000000191	Jak1 ---> APS:Fyn	1	1	0.129944	0.129944	0.476236	["ENSG00000010810"]	["FYN"]
CH000000195	Jak3 ---> APS:Fyn	1	1	0.129944	0.129944	0.476236	["ENSG00000010810"]	["FYN"]
CH000000200	Fyn ---> APS:Jak2	1	1	0.129944	0.129944	0.476236	["ENSG00000010810"]	["FYN"]
CH000000201	Fyn ---> APS:Jak3	1	1	0.129944	0.129944	0.476236	["ENSG00000010810"]	["FYN"]
CH000000203	Fyn ---> APS	1	1	0.129944	0.129944	0.476236	["ENSG00000010810"]	["FYN"]
CH000000329	Fyn-T ---> FYB-130	1	1	0.129944	0.129944	0.476236	["ENSG00000010810"]	["FYN"]
CH000000379	EGFR, Grb-2, Sos complex formation	1	1	0.129944	0.129944	0.476236	["ENSG00000115904"]	["SOS1"]
CH000004254	HMGCR regulation	11	59	7.66667	0.134264	0.489548	["ENSG00000100764","ENSG00000101182","ENSG00000103035","ENSG00000104549","ENSG00000108671","ENSG00000112972","ENSG00000113161","ENSG00000115233","ENSG00000173692","ENSG00000184787","ENSG00000197170"]	["HMGCR","HMGCS1","PSMA7","PSMC1","PSMD1","PSMD11","PSMD12","PSMD14","PSMD7","SQLE","UBE2G2"]
CH000000660	VEGF-A ---> NF-ATc	4	16	2.0791	0.143922	0.522086	["ENSG00000138814","ENSG00000143933","ENSG00000198668","ENSG00000221823"]	["CALM1","CALM2","PPP3CA","PPP3R1"]
CH000000567	OSM ---> ERK	5	22	2.85876	0.147194	0.531244	["ENSG00000069956","ENSG00000100030","ENSG00000115904","ENSG00000133703","ENSG00000213281"]	["KRAS","MAPK1","MAPK6","NRAS","SOS1"]
CH000000723	VEGF-A pathway	11	61	7.92655	0.159212	0.550464	["ENSG00000069956","ENSG00000087460","ENSG00000100030","ENSG00000110958","ENSG00000115415","ENSG00000115904","ENSG00000138814","ENSG00000143727","ENSG00000143933","ENSG00000198668","ENSG00000221823"]	["ACP1","CALM1","CALM2","GNAS","MAPK1","MAPK6","PPP3CA","PPP3R1","PTGES3","SOS1","STAT1"]
CH000003940	NMDA receptor signaling	7	35	4.54802	0.159701	0.550464	["ENSG00000010810","ENSG00000100030","ENSG00000115904","ENSG00000133703","ENSG00000143933","ENSG00000198668","ENSG00000213281"]	["CALM1","CALM2","FYN","KRAS","MAPK1","NRAS","SOS1"]
CH000003606	D-glucosamine-6-phosphate ---> CMP-N-acetylneuraminate	3	11	1.42938	0.162603	0.550464	["ENSG00000013375","ENSG00000111726","ENSG00000198380"]	["CMAS","GFPT1","PGM3"]
CH000004280	NR2B:NR2C ---RasGRF1---MEK1---> ERK2	3	11	1.42938	0.162603	0.550464	["ENSG00000100030","ENSG00000143933","ENSG00000198668"]	["CALM1","CALM2","MAPK1"]
CH000004282	NR2B:NR2C ---RasGRF1---MEK2---> ERK2	3	11	1.42938	0.162603	0.550464	["ENSG00000100030","ENSG00000143933","ENSG00000198668"]	["CALM1","CALM2","MAPK1"]
CH000000662	RhoA ---> stress fiber formation	6	29	3.76836	0.165249	0.550464	["ENSG00000058272","ENSG00000067900","ENSG00000070087","ENSG00000126777","ENSG00000134318","ENSG00000160007"]	["ARHGAP35","KTN1","PFN2","PPP1R12A","ROCK1","ROCK2"]
CH000000749	RhoA pathway 5	6	29	3.76836	0.165249	0.550464	["ENSG00000058272","ENSG00000067900","ENSG00000070087","ENSG00000126777","ENSG00000134318","ENSG00000160007"]	["ARHGAP35","KTN1","PFN2","PPP1R12A","ROCK1","ROCK2"]
CH000000607	BCR ---> ERK	5	23	2.9887	0.169318	0.550464	["ENSG00000069956","ENSG00000100030","ENSG00000115904","ENSG00000133703","ENSG00000213281"]	["KRAS","MAPK1","MAPK6","NRAS","SOS1"]
CH000004202	Cdc20 deubiquitination	5	23	2.9887	0.169318	0.550464	["ENSG00000004897","ENSG00000136014","ENSG00000156970","ENSG00000164109","ENSG00000170312"]	["BUB1B","CDC27","CDK1","MAD2L1","USP44"]
CH000003610	metabolism of amino sugars	4	17	2.20904	0.170065	0.550464	["ENSG00000013375","ENSG00000111726","ENSG00000198380","ENSG00000198408"]	["CMAS","GFPT1","OGA","PGM3"]
CH000004257	NR2A:NR2B ---Pyk2---MEK1---> ERK2	4	17	2.20904	0.170065	0.550464	["ENSG00000100030","ENSG00000115904","ENSG00000133703","ENSG00000213281"]	["KRAS","MAPK1","NRAS","SOS1"]
CH000004258	NR2A:NR2B ---Pyk2---MEK2---> ERK2	4	17	2.20904	0.170065	0.550464	["ENSG00000100030","ENSG00000115904","ENSG00000133703","ENSG00000213281"]	["KRAS","MAPK1","NRAS","SOS1"]
CH000004512	IL-5 ---Lyn--->ERK1	4	17	2.20904	0.170065	0.550464	["ENSG00000115904","ENSG00000133703","ENSG00000213281","ENSG00000254087"]	["KRAS","LYN","NRAS","SOS1"]
CH000000069	calcipressin-2 ---/ NF-AT	2	6	0.779661	0.177294	0.550464	["ENSG00000138814","ENSG00000221823"]	["PPP3CA","PPP3R1"]
CH000000070	calcipressin-1 ---/ NF-AT	2	6	0.779661	0.177294	0.550464	["ENSG00000138814","ENSG00000221823"]	["PPP3CA","PPP3R1"]
CH000000469	CNAIP ---> NF-AT	2	6	0.779661	0.177294	0.550464	["ENSG00000138814","ENSG00000221823"]	["PPP3CA","PPP3R1"]
CH000000566	OSM ---> STAT1	2	6	0.779661	0.177294	0.550464	["ENSG00000033800","ENSG00000115415"]	["PIAS1","STAT1"]
CH000000678	AC ---> PPAR-alpha	2	6	0.779661	0.177294	0.550464	["ENSG00000108946","ENSG00000114302"]	["PRKAR1A","PRKAR2A"]
CH000000681	activin A ---> Smad2	2	6	0.779661	0.177294	0.550464	["ENSG00000157077","ENSG00000175387"]	["SMAD2","ZFYVE9"]
CH000000701	p53 nuclear import	2	6	0.779661	0.177294	0.550464	["ENSG00000102753","ENSG00000186432"]	["KPNA3","KPNA4"]
CH000000708	Caspase-3 ---/ p53	2	6	0.779661	0.177294	0.550464	["ENSG00000079246","ENSG00000253729"]	["PRKDC","XRCC5"]
CH000000888	Smac ---> Caspase-3	2	6	0.779661	0.177294	0.550464	["ENSG00000101966","ENSG00000172115"]	["CYCS","XIAP"]
CH000001011	MAGI-2 ---> PTEN	2	6	0.779661	0.177294	0.550464	["ENSG00000035403","ENSG00000168036"]	["CTNNB1","VCL"]
CH000003562	Plk1 ---> INCENP	2	6	0.779661	0.177294	0.550464	["ENSG00000157456","ENSG00000170312"]	["CCNB2","CDK1"]
CH000004453	MITF ---> TPH1	2	6	0.779661	0.177294	0.550464	["ENSG00000100030","ENSG00000100393"]	["EP300","MAPK1"]
CH000004576	p53 ---Ubc13---> p53{ub{K63}} ubiquitination	2	6	0.779661	0.177294	0.550464	["ENSG00000169139","ENSG00000177889"]	["UBE2N","UBE2V2"]
CH000004592	N-cadherin:plakoglobin, homophilic ligation	2	6	0.779661	0.177294	0.550464	["ENSG00000170558","ENSG00000198561"]	["CDH2","CTNND1"]
CH000004596	VE-cadherin, ligation	2	6	0.779661	0.177294	0.550464	["ENSG00000168036","ENSG00000198561"]	["CTNNB1","CTNND1"]
CH000004630	TGFbeta1 ---> Smad2/3	2	6	0.779661	0.177294	0.550464	["ENSG00000157077","ENSG00000175387"]	["SMAD2","ZFYVE9"]
CH000004667	MEK ---> EZR	2	6	0.779661	0.177294	0.550464	["ENSG00000100030","ENSG00000177606"]	["JUN","MAPK1"]
CH000004678	FIH-1 ---/ NICD1	2	6	0.779661	0.177294	0.550464	["ENSG00000100393","ENSG00000168214"]	["EP300","RBPJ"]
CH000004684	p50:RelA-p65 ---> SELE	2	6	0.779661	0.177294	0.550464	["ENSG00000100393","ENSG00000129315"]	["CCNT1","EP300"]
CH000000743	tuberin pathway	6	30	3.89831	0.185515	0.573483	["ENSG00000115415","ENSG00000137154","ENSG00000151247","ENSG00000164924","ENSG00000165699","ENSG00000166913"]	["EIF4E","RPS6","STAT1","TSC1","YWHAB","YWHAZ"]
CH000004475	IL-3 signaling	8	43	5.58757	0.186417	0.573778	["ENSG00000100030","ENSG00000108946","ENSG00000114302","ENSG00000115904","ENSG00000133703","ENSG00000134308","ENSG00000164924","ENSG00000213281"]	["KRAS","MAPK1","NRAS","PRKAR1A","PRKAR2A","SOS1","YWHAQ","YWHAZ"]
CH000000574	mTOR ----> S6, eIF-4E	3	12	1.55932	0.197107	0.593856	["ENSG00000115415","ENSG00000137154","ENSG00000151247"]	["EIF4E","RPS6","STAT1"]
CH000004540	LC3B ---p62---/ Dvl-2	3	12	1.55932	0.197107	0.593856	["ENSG00000100387","ENSG00000140941","ENSG00000154582"]	["ELOC","MAP1LC3B","RBX1"]
CH000000585	MHC class II ---> NF-AT	5	25	3.24859	0.217026	0.593856	["ENSG00000010810","ENSG00000138814","ENSG00000143933","ENSG00000198668","ENSG00000221823"]	["CALM1","CALM2","FYN","PPP3CA","PPP3R1"]
CH000000768	APP pathway	5	25	3.24859	0.217026	0.593856	["ENSG00000078304","ENSG00000113575","ENSG00000142192","ENSG00000157456","ENSG00000170312"]	["APP","CCNB2","CDK1","PPP2CA","PPP2R5C"]
CH000000770	beta-catenin network	4	19	2.46893	0.226603	0.593856	["ENSG00000010810","ENSG00000035403","ENSG00000168036","ENSG00000198561"]	["CTNNB1","CTNND1","FYN","VCL"]
CH000004296	phytanic acid ---> pristanic acid	4	19	2.46893	0.226603	0.593856	["ENSG00000068366","ENSG00000072210","ENSG00000123983","ENSG00000164904"]	["ACSL3","ACSL4","ALDH3A2","ALDH7A1"]
CH000000045	Hsp90 ---> AhR	2	7	0.909605	0.22785	0.593856	["ENSG00000080824","ENSG00000110958"]	["HSP90AA1","PTGES3"]
CH000000645	PDGF B ---SHP-2---> Ras; PDGF B ---RasGAP---/ Ras	2	7	0.909605	0.22785	0.593856	["ENSG00000133703","ENSG00000213281"]	["KRAS","NRAS"]
CH000000646	PDGF B---/ Ras	2	7	0.909605	0.22785	0.593856	["ENSG00000133703","ENSG00000213281"]	["KRAS","NRAS"]
CH000000688	BMP7 ---> Smad1, Smad5, Smad8	2	7	0.909605	0.22785	0.593856	["ENSG00000113658","ENSG00000170365"]	["SMAD1","SMAD5"]
CH000000975	Usp7 ---/ p53	2	7	0.909605	0.22785	0.593856	["ENSG00000109332","ENSG00000187555"]	["UBE2D3","USP7"]
CH000003574	SIRT1 ---/ AR	2	7	0.909605	0.22785	0.593856	["ENSG00000100393","ENSG00000141027"]	["EP300","NCOR1"]
CH000003713	dopamine ---> homovanillate	2	7	0.909605	0.22785	0.593856	["ENSG00000072210","ENSG00000164904"]	["ALDH3A2","ALDH7A1"]
CH000004247	ER-alpha (NR3A1) ubiquitination	2	7	0.909605	0.22785	0.593856	["ENSG00000012048","ENSG00000109332"]	["BRCA1","UBE2D3"]
CH000004507	IL-5 ---> Sox4	2	7	0.909605	0.22785	0.593856	["ENSG00000124766","ENSG00000137575"]	["SDCBP","SOX4"]
CH000000932	PRL ---> Raf-1	3	13	1.68927	0.233159	0.593856	["ENSG00000115904","ENSG00000133703","ENSG00000213281"]	["KRAS","NRAS","SOS1"]
CH000003663	reactions of pyruvate and phosphoenolpyruvate	3	13	1.68927	0.233159	0.593856	["ENSG00000111716","ENSG00000134333","ENSG00000168291"]	["LDHA (ENSG00000134333)","LDHB","PDHB"]
CH000004676	prostanoid receptor signaling	5	26	3.37853	0.242303	0.593856	["ENSG00000087460","ENSG00000108946","ENSG00000110958","ENSG00000114302","ENSG00000168036"]	["CTNNB1","GNAS","PRKAR1A","PRKAR2A","PTGES3"]
CH000000021	Rac1 ---/ stathmin	1	2	0.259887	0.243055	0.593856	["ENSG00000117632"]	["STMN1"]
CH000000033	MKP-3 ---> MBP	1	2	0.259887	0.243055	0.593856	["ENSG00000139318"]	["DUSP6"]
CH000000056	Rad23A ---/ p53	1	2	0.259887	0.243055	0.593856	["ENSG00000100393"]	["EP300"]
CH000000171	Smurf-1 ---> Smad1, Smad7	1	2	0.259887	0.243055	0.593856	["ENSG00000170365"]	["SMAD1"]
CH000000186	Lyn ---> APS:Syk	1	2	0.259887	0.243055	0.593856	["ENSG00000254087"]	["LYN"]
CH000000199	Syk ---> APS:Fyn	1	2	0.259887	0.243055	0.593856	["ENSG00000010810"]	["FYN"]
CH000000202	Fyn ---> APS:Syk	1	2	0.259887	0.243055	0.593856	["ENSG00000010810"]	["FYN"]
CH000000265	c-Cbl, Fyn complex formation	1	2	0.259887	0.243055	0.593856	["ENSG00000010810"]	["FYN"]
CH000000298	CH000000298	1	2	0.259887	0.243055	0.593856	["ENSG00000114315"]	["HES1"]
CH000000299	CH000000299	1	2	0.259887	0.243055	0.593856	["ENSG00000114315"]	["HES1"]
CH000000326	ERK2 ---> VEGFA	1	2	0.259887	0.243055	0.593856	["ENSG00000100030"]	["MAPK1"]
CH000000328	Fyn-T ---> FYB-130:SLP-76	1	2	0.259887	0.243055	0.593856	["ENSG00000010810"]	["FYN"]
CH000000374	PDK1 ---> rhoB:PRK2	1	2	0.259887	0.243055	0.593856	["ENSG00000065243"]	["PKN2"]
CH000000440	ERK2 ---> T3R-alpha1	1	2	0.259887	0.243055	0.593856	["ENSG00000100030"]	["MAPK1"]
CH000000459	LAP1 ---> FAK1	1	2	0.259887	0.243055	0.593856	["ENSG00000150093"]	["ITGB1"]
CH000000535	GEFT ---Cdc42---> Elk-1	1	2	0.259887	0.243055	0.593856	["ENSG00000070831"]	["CDC42"]
CH000000536	GEFT ---Cdc42---> SAP-1	1	2	0.259887	0.243055	0.593856	["ENSG00000070831"]	["CDC42"]
CH000000537	GEFT ---Cdc42---> c-Jun	1	2	0.259887	0.243055	0.593856	["ENSG00000070831"]	["CDC42"]
CH000000558	c-Ets-2 & GR ---> CYP27	1	2	0.259887	0.243055	0.593856	["ENSG00000157557"]	["ETS2"]
CH000000797	G-alpha-q ---> IP3	1	2	0.259887	0.243055	0.593856	["ENSG00000156052"]	["GNAQ"]
CH000000860	Trx ---/ ASK1	1	2	0.259887	0.243055	0.593856	["ENSG00000136810"]	["TXN"]
CH000000912	Caspase-3 ---/ Rad21	1	2	0.259887	0.243055	0.593856	["ENSG00000164754"]	["RAD21"]
CH000000921	Caspase-8 ---/ Mcl-1L	1	2	0.259887	0.243055	0.593856	["ENSG00000143384"]	["MCL1"]
CH000000998	HMGB1 ---> p73	1	2	0.259887	0.243055	0.593856	["ENSG00000189403"]	["HMGB1"]
CH000003639	phosphoserine ---> 3-phosphoglycerate	1	2	0.259887	0.243055	0.593856	["ENSG00000135069"]	["PSAT1"]
CH000003662	L-glutamate ---> 2-oxoglutarate, ammonia	1	2	0.259887	0.243055	0.593856	["ENSG00000148672"]	["GLUD1"]
CH000003664	L-glutamate ---> 2-oxoglutarate	1	2	0.259887	0.243055	0.593856	["ENSG00000148672"]	["GLUD1"]
CH000003666	2-oxoglutarate ---> 2-hydroxyglutarate	1	2	0.259887	0.243055	0.593856	["ENSG00000014641"]	["MDH1"]
CH000003682	PPi ---> Pi	1	2	0.259887	0.243055	0.593856	["ENSG00000180817"]	["PPA1"]
CH000003804	Abl ---> TOPBP1	1	2	0.259887	0.243055	0.593856	["ENSG00000163781"]	["TOPBP1"]
CH000003846	leukotriene A4 ---> 10-HOTrE	1	2	0.259887	0.243055	0.593856	["ENSG00000111144"]	["LTA4H"]
CH000004211	p73 ---> Tp73	1	2	0.259887	0.243055	0.593856	["ENSG00000137693"]	["YAP1"]
CH000004212	p73 ---> bax	1	2	0.259887	0.243055	0.593856	["ENSG00000137693"]	["YAP1"]
CH000004408	NICD1 ---> c-myc	1	2	0.259887	0.243055	0.593856	["ENSG00000100811"]	["YY1"]
CH000004418	AR ---> IRS2, IGF1R, SGK, BIRC5	1	2	0.259887	0.243055	0.593856	["ENSG00000156802"]	["ATAD2"]
CH000004473	PIASy ---> STAT1alpha	1	2	0.259887	0.243055	0.593856	["ENSG00000115415"]	["STAT1"]
CH000004533	STAT1 ---IRF-1---> IRF2	1	2	0.259887	0.243055	0.593856	["ENSG00000115415"]	["STAT1"]
CH000004553	GABP ---> SKP2 transcription	1	2	0.259887	0.243055	0.593856	["ENSG00000104064"]	["GABPB1"]
CH000004603	TAZ ---> CTGF	1	2	0.259887	0.243055	0.593856	["ENSG00000187079"]	["TEAD1"]
CH000004620	NF-AT5 nuclear exclusion	1	2	0.259887	0.243055	0.593856	["ENSG00000113712"]	["CSNK1A1"]
CH000004673	HIF-1alpha ---> LEP	1	2	0.259887	0.243055	0.593856	["ENSG00000100644"]	["HIF1A"]
CH000004677	HIF-1alpha inhibition	1	2	0.259887	0.243055	0.593856	["ENSG00000100644"]	["HIF1A"]
CH000000605	BCR ---> NF-AT	4	20	2.59887	0.256478	0.620258	["ENSG00000138814","ENSG00000143933","ENSG00000198668","ENSG00000221823"]	["CALM1","CALM2","PPP3CA","PPP3R1"]
CH000003887	Usp44 ---> Cdc20	4	20	2.59887	0.256478	0.620258	["ENSG00000004897","ENSG00000136014","ENSG00000156970","ENSG00000164109"]	["BUB1B","CDC27","MAD2L1","USP44"]
CH000004483	IL-3 ---Ras---> Bcl-2, MBP, CREB1	4	20	2.59887	0.256478	0.620258	["ENSG00000100030","ENSG00000115904","ENSG00000133703","ENSG00000213281"]	["KRAS","MAPK1","NRAS","SOS1"]
CH000000663	Hsp90 ---> AhR	2	8	1.03955	0.279197	0.64923	["ENSG00000080824","ENSG00000110958"]	["HSP90AA1","PTGES3"]
CH000000665	AhR transcriptional activity	2	8	1.03955	0.279197	0.64923	["ENSG00000100393","ENSG00000124151"]	["EP300","NCOA3"]
CH000000819	dsRNA ---> IRF-7:IRF-3:CBP:p300	2	8	1.03955	0.279197	0.64923	["ENSG00000005339","ENSG00000100393"]	["CREBBP","EP300"]
CH000000839	c-Jun degradation via COP1	2	8	1.03955	0.279197	0.64923	["ENSG00000100387","ENSG00000177606"]	["JUN","RBX1"]
CH000000875	ErbB1 ---> endophilin 1	2	8	1.03955	0.279197	0.64923	["ENSG00000097033","ENSG00000147010"]	["SH3GLB1","SH3KBP1"]
CH000000953	CHIP ---/ Pael-R	2	8	1.03955	0.279197	0.64923	["ENSG00000086061","ENSG00000109971"]	["DNAJA1","HSPA8"]
CH000004511	IL-5 ---Lyn, STAT1alpha--->ICAM1	2	8	1.03955	0.279197	0.64923	["ENSG00000115415","ENSG00000254087"]	["LYN","STAT1"]
CH000004583	homophilic ligation of E-cadherin	2	8	1.03955	0.279197	0.64923	["ENSG00000168036","ENSG00000198561"]	["CTNNB1","CTNND1"]
CH000004640	transcriptional regulation of ECM components	2	8	1.03955	0.279197	0.64923	["ENSG00000100393","ENSG00000175387"]	["EP300","SMAD2"]
CH000000751	T-cell antigen receptor pathway	13	84	10.9153	0.290565	0.64923	["ENSG00000010810","ENSG00000055130","ENSG00000069956","ENSG00000100030","ENSG00000109332","ENSG00000115904","ENSG00000133703","ENSG00000138814","ENSG00000143933","ENSG00000177606","ENSG00000198668","ENSG00000213281","ENSG00000221823"]	["CALM1","CALM2","CUL1","FYN","JUN","KRAS","MAPK1","MAPK6","NRAS","PPP3CA","PPP3R1","SOS1","UBE2D3"]
CH000004201	Cdc20 ubiquitination	4	22	2.85876	0.318167	0.64923	["ENSG00000004897","ENSG00000156970","ENSG00000164109","ENSG00000170312"]	["BUB1B","CDC27","CDK1","MAD2L1"]
CH000000771	Fas pathway	5	29	3.76836	0.321921	0.64923	["ENSG00000065243","ENSG00000101966","ENSG00000134308","ENSG00000163349","ENSG00000172115"]	["CYCS","HIPK1","PKN2","XIAP","YWHAQ"]
CH000004706	FA network	5	29	3.76836	0.321921	0.64923	["ENSG00000077152","ENSG00000114742","ENSG00000140525","ENSG00000144554","ENSG00000162607"]	["FANCD2","FANCI","UBE2T","USP1","WDR48"]
CH000000587	LAT ---> Ras	2	9	1.16949	0.330281	0.64923	["ENSG00000133703","ENSG00000213281"]	["KRAS","NRAS"]
CH000000658	PDK1 ---> 4E-BP1, p70S6K1	2	9	1.16949	0.330281	0.64923	["ENSG00000137154","ENSG00000151247"]	["EIF4E","RPS6"]
CH000000721	SMRT ---/ AhR	2	9	1.16949	0.330281	0.64923	["ENSG00000080824","ENSG00000110958"]	["HSP90AA1","PTGES3"]
CH000000923	p53 transcription complex	2	9	1.16949	0.330281	0.64923	["ENSG00000092201","ENSG00000173473"]	["SMARCC1","SUPT16H"]
CH000000954	E1 ---/ cyclin E	2	9	1.16949	0.330281	0.64923	["ENSG00000055130","ENSG00000109670"]	["CUL1","FBXW7"]
CH000003605	CO2, H2O ---> spermine	2	9	1.16949	0.330281	0.64923	["ENSG00000102172","ENSG00000115758"]	["ODC1","SMS"]
CH000003683	sulfur metabolism	2	9	1.16949	0.330281	0.64923	["ENSG00000138801","ENSG00000180817"]	["PAPSS1","PPA1"]
CH000003685	L-valine ---> 3-amino-isobutyrate	2	9	1.16949	0.330281	0.64923	["ENSG00000060982","ENSG00000117054"]	["ACADM","BCAT1"]
CH000003773	GDP ---> dGTP	2	9	1.16949	0.330281	0.64923	["ENSG00000167325","ENSG00000171848"]	["RRM1","RRM2"]
CH000003778	ADP ---> dATP	2	9	1.16949	0.330281	0.64923	["ENSG00000167325","ENSG00000171848"]	["RRM1","RRM2"]
CH000004608	EphA/ephrin signaling	2	9	1.16949	0.330281	0.64923	["ENSG00000010810","ENSG00000184349"]	["EFNA5","FYN"]
CH000004651	AT1A ---beta-arrestin2---> EIF-4E	2	9	1.16949	0.330281	0.64923	["ENSG00000100030","ENSG00000151247"]	["EIF4E","MAPK1"]
CH000000081	AKT-1(h) ---> FOXO3a(h){p}:14-3-3zeta(h)	1	3	0.389831	0.341508	0.64923	["ENSG00000164924"]	["YWHAZ"]
CH000000116	Caspase-9 processing	1	3	0.389831	0.341508	0.64923	["ENSG00000172115"]	["CYCS"]
CH000000151	TGFbeta receptor ---> Smad2-L	1	3	0.389831	0.341508	0.64923	["ENSG00000175387"]	["SMAD2"]
CH000000160	angiotensin II ---> STAT1	1	3	0.389831	0.341508	0.64923	["ENSG00000115415"]	["STAT1"]
CH000000169	TGFbetaR ---> Smad2-L	1	3	0.389831	0.341508	0.64923	["ENSG00000175387"]	["SMAD2"]
CH000000230	Cdc42, Pard6a, PKCzeta complex formation	1	3	0.389831	0.341508	0.64923	["ENSG00000070831"]	["CDC42"]
CH000000270	AKT-1 ---> p27Kip1:Skp2	1	3	0.389831	0.341508	0.64923	["ENSG00000145604"]	["SKP2"]
CH000000271	AKT-1 ---> p27Kip1:14-3-3tau	1	3	0.389831	0.341508	0.64923	["ENSG00000134308"]	["YWHAQ"]
CH000000272	AKT-1 ---> p27Kip1:14-3-3eta	1	3	0.389831	0.341508	0.64923	["ENSG00000128245"]	["YWHAH"]
CH000000273	AKT-1 ---> p27Kip1:14-3-3epsilon	1	3	0.389831	0.341508	0.64923	["ENSG00000108953"]	["YWHAE (ENSG00000108953)"]
CH000000308	Smac ---> Caspase-3	1	3	0.389831	0.341508	0.64923	["ENSG00000101966"]	["XIAP"]
CH000000309	tBid-p13 ---> Cytochrome C	1	3	0.389831	0.341508	0.64923	["ENSG00000172115"]	["CYCS"]
CH000000327	Fyn-T ---> SLAP-130:SLP-76	1	3	0.389831	0.341508	0.64923	["ENSG00000010810"]	["FYN"]
CH000000372	PDK1 ---> rhoB:PRK1	1	3	0.389831	0.341508	0.64923	["ENSG00000065243"]	["PKN2"]
CH000000402	InsR ---CAP---> c-Cbl	1	3	0.389831	0.341508	0.64923	["ENSG00000095637"]	["SORBS1"]
CH000000453	E2F-5, DP-1, p130 complex formation	1	3	0.389831	0.341508	0.64923	["ENSG00000198176"]	["TFDP1"]
CH000000454	E2F-5, DP-1, p107 complex formation	1	3	0.389831	0.341508	0.64923	["ENSG00000198176"]	["TFDP1"]
CH000000509	MKP-7 ---/ MBP	1	3	0.389831	0.341508	0.64923	["ENSG00000111266"]	["DUSP16 (ENSG00000111266)"]
CH000000511	TAO1 ---> p38alpha	1	3	0.389831	0.341508	0.64923	["ENSG00000160551"]	["TAOK1"]
CH000000523	p38alpha ---> eIF-4E	1	3	0.389831	0.341508	0.64923	["ENSG00000151247"]	["EIF4E"]
CH000000526	Cas ---/ RalA	1	3	0.389831	0.341508	0.64923	["ENSG00000006451"]	["RALA"]
CH000000541	PTP-PEST ---/ paxillin	1	3	0.389831	0.341508	0.64923	["ENSG00000127947"]	["PTPN12"]
CH000000553	Pyk2 ---> Cdc42	1	3	0.389831	0.341508	0.64923	["ENSG00000070831"]	["CDC42"]
CH000000564	mTOR ---> eIF4E	1	3	0.389831	0.341508	0.64923	["ENSG00000151247"]	["EIF4E"]
CH000000603	Epo ---> STAT1alpha, STAT3	1	3	0.389831	0.341508	0.64923	["ENSG00000115415"]	["STAT1"]
CH000000617	Rac1 ---MLK3---> c-Jun	1	3	0.389831	0.341508	0.64923	["ENSG00000177606"]	["JUN"]
CH000000618	Rac1 ---> p38	1	3	0.389831	0.341508	0.64923	["ENSG00000085511"]	["MAP3K4"]
CH000000626	EGF ---> STAT1alpha, STAT3	1	3	0.389831	0.341508	0.64923	["ENSG00000115415"]	["STAT1"]
CH000000635	PDGF B ---> STAT1alpha, STAT5	1	3	0.389831	0.341508	0.64923	["ENSG00000115415"]	["STAT1"]
CH000000661	VEGF-A ---> STAT1alpha	1	3	0.389831	0.341508	0.64923	["ENSG00000115415"]	["STAT1"]
CH000000664	AhR nuclear export	1	3	0.389831	0.341508	0.64923	["ENSG00000082898"]	["XPO1"]
CH000000716	JAB1 ---> HIF-1alpha	1	3	0.389831	0.341508	0.64923	["ENSG00000100644"]	["HIF1A"]
CH000000735	LMW-PTP ---/ VEGFR-1	1	3	0.389831	0.341508	0.64923	["ENSG00000143727"]	["ACP1"]
CH000000744	tuberin ---> Rheb	1	3	0.389831	0.341508	0.64923	["ENSG00000165699"]	["TSC1"]
CH000000807	MKK7 ---> c-Jun	1	3	0.389831	0.341508	0.64923	["ENSG00000177606"]	["JUN"]
CH000000833	Caspase-3 ---> Bax	1	3	0.389831	0.341508	0.64923	["ENSG00000134308"]	["YWHAQ"]
CH000000844	ERK1 ---> eIF-4E	1	3	0.389831	0.341508	0.64923	["ENSG00000151247"]	["EIF4E"]
CH000000989	CtBP ---/ p53	1	3	0.389831	0.341508	0.64923	["ENSG00000175029"]	["CTBP2"]
CH000000992	Trx1 ---/ p27Kip1,AP-1	1	3	0.389831	0.341508	0.64923	["ENSG00000136810"]	["TXN"]
CH000000996	TBP-2 ---/ Trx	1	3	0.389831	0.341508	0.64923	["ENSG00000136810"]	["TXN"]
CH000001026	importin-alpha3 ---> NFkappaB	1	3	0.389831	0.341508	0.64923	["ENSG00000102753"]	["KPNA3"]
CH000003570	acetyl-CoA ---> palmitic acid	1	3	0.389831	0.341508	0.64923	["ENSG00000131238"]	["PPT1"]
CH000003575	L-glutamine ---> uridine-5'-phosphate	1	3	0.389831	0.341508	0.64923	["ENSG00000114491"]	["UMPS"]
CH000003576	synthesis of pyrimidine ribonucleotides	1	3	0.389831	0.341508	0.64923	["ENSG00000114491"]	["UMPS"]
CH000003826	hnRNPA1 ---/ AR	1	3	0.389831	0.341508	0.64923	["ENSG00000135486"]	["HNRNPA1"]
CH000004342	ER-alpha --->TFF1	1	3	0.389831	0.341508	0.64923	["ENSG00000100393"]	["EP300"]
CH000004409	alpha-enolase (MBP-1) ---NICD1---/ c-myc	1	3	0.389831	0.341508	0.64923	["ENSG00000100811"]	["YY1"]
CH000004532	ATG13 ---> ulk1	1	3	0.389831	0.341508	0.64923	["ENSG00000023287"]	["RB1CC1"]
CH000004606	ephrin-A1 ---> Fyn	1	3	0.389831	0.341508	0.64923	["ENSG00000010810"]	["FYN"]
CH000004631	SMAD7, SIK1 gene induction	1	3	0.389831	0.341508	0.64923	["ENSG00000175387"]	["SMAD2"]
CH000004662	HIF-1alpha ---> ENG	1	3	0.389831	0.341508	0.64923	["ENSG00000100644"]	["HIF1A"]
CH000004665	FN1	1	3	0.389831	0.341508	0.64923	["ENSG00000100393"]	["EP300"]
CH000004672	CKI-delta ---> HIF-1alpha	1	3	0.389831	0.341508	0.64923	["ENSG00000100644"]	["HIF1A"]
CH000004683	PGE2 ---> CCND1	1	3	0.389831	0.341508	0.64923	["ENSG00000168036"]	["CTNNB1"]
CH000004686	hipk2 ---> C/EBPbeta	1	3	0.389831	0.341508	0.64923	["ENSG00000100393"]	["EP300"]
CH000000576	AKT, MAPKAPK2 ---/ tuberin	3	16	2.0791	0.345786	0.653867	["ENSG00000164924","ENSG00000165699","ENSG00000166913"]	["TSC1","YWHAB","YWHAZ"]
CH000004477	IL-3 ---> 14-3-3	3	16	2.0791	0.345786	0.653867	["ENSG00000108946","ENSG00000114302","ENSG00000164924"]	["PRKAR1A","PRKAR2A","YWHAZ"]
CH000004674	EP2 ---> BDNF	4	23	2.9887	0.349504	0.659144	["ENSG00000087460","ENSG00000108946","ENSG00000110958","ENSG00000114302"]	["GNAS","PRKAR1A","PRKAR2A","PTGES3"]
CH000004397	VDR ---> RXR-alpha ---> transcriptional activation	6	38	4.93785	0.371732	0.688023	["ENSG00000047315","ENSG00000100393","ENSG00000100603","ENSG00000125686","ENSG00000132475","ENSG00000163041"]	["EP300","H3-3A","H3-3B","MED1","POLR2B","SNW1"]
CH000000257	PP2A ---> CXCR2:PR65	2	10	1.29944	0.380306	0.688023	["ENSG00000078304","ENSG00000113575"]	["PPP2CA","PPP2R5C"]
CH000000720	AhRR ---/ AhR	2	10	1.29944	0.380306	0.688023	["ENSG00000080824","ENSG00000110958"]	["HSP90AA1","PTGES3"]
CH000003729	L-tryptophan ---> 5-hydroxyindoleacetate	2	10	1.29944	0.380306	0.688023	["ENSG00000072210","ENSG00000164904"]	["ALDH3A2","ALDH7A1"]
CH000004233	Glu ---GluR1:GluR3---> c-fos	2	10	1.29944	0.380306	0.688023	["ENSG00000143933","ENSG00000198668"]	["CALM1","CALM2"]
CH000004455	caveolin-1 ---calmodulin1---> eNOS	2	10	1.29944	0.380306	0.688023	["ENSG00000080824","ENSG00000198668"]	["CALM1","HSP90AA1"]
CH000004688	ErbB4-JM-A CYT1 ---> YAP	2	10	1.29944	0.380306	0.688023	["ENSG00000137693","ENSG00000151694"]	["ADAM17","YAP1"]
CH000004274	NR2A:NR2B ---Pyk2---MEK1---> ERK1	3	17	2.20904	0.383441	0.688023	["ENSG00000115904","ENSG00000133703","ENSG00000213281"]	["KRAS","NRAS","SOS1"]
CH000004275	NR2A:NR2B ---Pyk2---MEK2---> ERK1	3	17	2.20904	0.383441	0.688023	["ENSG00000115904","ENSG00000133703","ENSG00000213281"]	["KRAS","NRAS","SOS1"]
CH000004642	TGFbetaR-I ---pak2, ERK1---> SMAD7, SERPINE1	3	17	2.20904	0.383441	0.688023	["ENSG00000100030","ENSG00000175387","ENSG00000180370"]	["MAPK1","PAK2","SMAD2"]
CH000000690	G1 phase (Cdk6)	5	32	4.15819	0.403997	0.688023	["ENSG00000112242","ENSG00000114126","ENSG00000118971","ENSG00000165891","ENSG00000198176"]	["CCND2","E2F3","E2F7","TFDP1","TFDP2"]
CH000004590	tubulin ---restin, IQGAP1---> actin	4	25	3.24859	0.412085	0.688023	["ENSG00000101367","ENSG00000137267","ENSG00000140575","ENSG00000167552"]	["IQGAP1","MAPRE1","TUBA1A","TUBB2A"]
CH000000001	RhoA ---/ cofilin	1	4	0.519774	0.427196	0.688023	["ENSG00000067900"]	["ROCK1"]
CH000000096	Cdc34 ---> IkappaB-alpha	1	4	0.519774	0.427196	0.688023	["ENSG00000055130"]	["CUL1"]
CH000000153	MEKK1 ---> NF-kappaB:Trx1	1	4	0.519774	0.427196	0.688023	["ENSG00000136810"]	["TXN"]
CH000000155	MKK4 ---> NF-kappaB:Trx1	1	4	0.519774	0.427196	0.688023	["ENSG00000136810"]	["TXN"]
CH000000312	Apaf-1, Caspase-9, Caspase-3, XIAP complex formation	1	4	0.519774	0.427196	0.688023	["ENSG00000101966"]	["XIAP"]
CH000000361	CH000000361	1	4	0.519774	0.427196	0.688023	["ENSG00000166913"]	["YWHAB"]
CH000000456	ErbB1 ---> Ras	1	4	0.519774	0.427196	0.688023	["ENSG00000115904"]	["SOS1"]
CH000000471	TAK1 ---> c-Jun	1	4	0.519774	0.427196	0.688023	["ENSG00000177606"]	["JUN"]
CH000000508	MKK6 ---> MBP	1	4	0.519774	0.427196	0.688023	["ENSG00000111266"]	["DUSP16 (ENSG00000111266)"]
CH000000513	MEK1 ---> STAT3	1	4	0.519774	0.427196	0.688023	["ENSG00000100030"]	["MAPK1"]
CH000000524	Epo ---Lyn---> STAT5A	1	4	0.519774	0.427196	0.688023	["ENSG00000254087"]	["LYN"]
CH000000530	MKK6 ---> Hsp27	1	4	0.519774	0.427196	0.688023	["ENSG00000089022"]	["MAPKAPK5"]
CH000000540	RANKL ---> Src	1	4	0.519774	0.427196	0.688023	["ENSG00000121774"]	["KHDRBS1"]
CH000000565	mTOR ---> S6	1	4	0.519774	0.427196	0.688023	["ENSG00000137154"]	["RPS6"]
CH000000581	deubiquitination of AF-6	1	4	0.519774	0.427196	0.688023	["ENSG00000130396"]	["AFDN"]
CH000000600	beta-catenin:E-cadherin complex phosphorylation and dephosphorylation	1	4	0.519774	0.427196	0.688023	["ENSG00000168036"]	["CTNNB1"]
CH000000621	Spry2 ---> ErbB1	1	4	0.519774	0.427196	0.688023	["ENSG00000147010"]	["SH3KBP1"]
CH000000673	Apaf-1 ---> Caspase-7	1	4	0.519774	0.427196	0.688023	["ENSG00000172115"]	["CYCS"]
CH000000674	Apaf-1 ---> Caspase-3	1	4	0.519774	0.427196	0.688023	["ENSG00000172115"]	["CYCS"]
CH000000728	EGF ---> STAT1alpha	1	4	0.519774	0.427196	0.688023	["ENSG00000115415"]	["STAT1"]
CH000000745	tuberin ---/ beta-catenin	1	4	0.519774	0.427196	0.688023	["ENSG00000165699"]	["TSC1"]
CH000000806	MKK4 ---> c-Jun	1	4	0.519774	0.427196	0.688023	["ENSG00000177606"]	["JUN"]
CH000000817	JLP ---> JNK1	1	4	0.519774	0.427196	0.688023	["ENSG00000008294"]	["SPAG9"]
CH000000829	MEKK4 ---> JNK1	1	4	0.519774	0.427196	0.688023	["ENSG00000085511"]	["MAP3K4"]
CH000000854	PP2Calpha ---/ MKK6	1	4	0.519774	0.427196	0.688023	["ENSG00000085511"]	["MAP3K4"]
CH000000855	PP2Calpha ---/ MKK4	1	4	0.519774	0.427196	0.688023	["ENSG00000085511"]	["MAP3K4"]
CH000000867	Abl ---> p73alpha	1	4	0.519774	0.427196	0.688023	["ENSG00000100393"]	["EP300"]
CH000000892	Caspase-8 ---> Cytochrome C	1	4	0.519774	0.427196	0.688023	["ENSG00000172115"]	["CYCS"]
CH000000896	granzyme B ---> Cytochrome C	1	4	0.519774	0.427196	0.688023	["ENSG00000172115"]	["CYCS"]
CH000000924	Cdk2 ---> p53	1	4	0.519774	0.427196	0.688023	["ENSG00000145386"]	["CCNA2"]
CH000000967	PI3K ---AKT-1---/ FOXO4	1	4	0.519774	0.427196	0.688023	["ENSG00000164924"]	["YWHAZ"]
CH000000970	ATR ---/ Mdm2	1	4	0.519774	0.427196	0.688023	["ENSG00000142676"]	["RPL11"]
CH000000990	p300 ---> ER	1	4	0.519774	0.427196	0.688023	["ENSG00000100393"]	["EP300"]
CH000001007	beta-catenin ---/ KAI1	1	4	0.519774	0.427196	0.688023	["ENSG00000168036"]	["CTNNB1"]
CH000001017	Internalization of Smo	1	4	0.519774	0.427196	0.688023	["ENSG00000141367"]	["CLTC"]
CH000003414	Mdm2 ---> NBS1	1	4	0.519774	0.427196	0.688023	["ENSG00000113522"]	["RAD50"]
CH000003551	SUMO-1 ---> PIAS	1	4	0.519774	0.427196	0.688023	["ENSG00000033800"]	["PIAS1"]
CH000003675	L-asparagine ---> L-glutamate, oxaloacetate	1	4	0.519774	0.427196	0.688023	["ENSG00000162174"]	["ASRGL1"]
CH000004213	AKT-1 ---/ FOXO3a	1	4	0.519774	0.427196	0.688023	["ENSG00000164924"]	["YWHAZ"]
CH000004329	stearic acid ---> nervonic acid	1	4	0.519774	0.427196	0.688023	["ENSG00000099194"]	["SCD"]
CH000004438	Ubc5C ubiquitin conjugation	1	4	0.519774	0.427196	0.688023	["ENSG00000109332"]	["UBE2D3"]
CH000004503	T3 ---> CYP7A1	1	4	0.519774	0.427196	0.688023	["ENSG00000005339"]	["CREBBP"]
CH000004554	GABP ---> SKP2 transcriptional repression	1	4	0.519774	0.427196	0.688023	["ENSG00000104064"]	["GABPB1"]
CH000004607	Ephrin-A5 ---> PI3K	1	4	0.519774	0.427196	0.688023	["ENSG00000184349"]	["EFNA5"]
CH000004658	E-cadherin ---/ HMOX1, NQO1	1	4	0.519774	0.427196	0.688023	["ENSG00000168036"]	["CTNNB1"]
CH000004721	aldosterone ---> EDN1	1	4	0.519774	0.427196	0.688023	["ENSG00000100393"]	["EP300"]
CH000000791	CXCR2 internalization via clathrin-coated pits	2	11	1.42938	0.428684	0.688023	["ENSG00000100380","ENSG00000141367"]	["CLTC","ST13"]
CH000000856	Wnt activation of LRP5/6/frizzled/axin complex	2	11	1.42938	0.428684	0.688023	["ENSG00000070018","ENSG00000155760"]	["FZD7","LRP6 (ENSG00000070018)"]
CH000003702	L-leucine, 2-oxoglutarate ---> acetoacetate, acetyl-CoA	2	11	1.42938	0.428684	0.688023	["ENSG00000060982","ENSG00000117054"]	["ACADM","BCAT1"]
CH000003876	Pin1 ---> Tau	2	11	1.42938	0.428684	0.688023	["ENSG00000078304","ENSG00000113575"]	["PPP2CA","PPP2R5C"]
CH000004279	NR2B:NR2C ---RasGRF1---MEK1---> ERK1	2	11	1.42938	0.428684	0.688023	["ENSG00000143933","ENSG00000198668"]	["CALM1","CALM2"]
CH000004281	NR2B:NR2C ---RasGRF1---MEK2---> ERK1	2	11	1.42938	0.428684	0.688023	["ENSG00000143933","ENSG00000198668"]	["CALM1","CALM2"]
CH000004625	MIC2 signaling	2	11	1.42938	0.428684	0.688023	["ENSG00000100030","ENSG00000177606"]	["JUN","MAPK1"]
CH000004689	ErbB4-JM-A CYT2 ---> YAP, WOX1	2	11	1.42938	0.428684	0.688023	["ENSG00000137693","ENSG00000151694"]	["ADAM17","YAP1"]
CH000000926	PRL pathway	7	48	6.23729	0.434444	0.695698	["ENSG00000010810","ENSG00000069956","ENSG00000100030","ENSG00000115904","ENSG00000133703","ENSG00000169398","ENSG00000213281"]	["FYN","KRAS","MAPK1","MAPK6","NRAS","PTK2","SOS1"]
CH000000898	Apo2L pathway	3	19	2.46893	0.456958	0.71638	["ENSG00000101966","ENSG00000134308","ENSG00000172115"]	["CYCS","XIAP","YWHAQ"]
CH000004471	IFNgamma signaling	3	19	2.46893	0.456958	0.71638	["ENSG00000005339","ENSG00000012048","ENSG00000115415"]	["BRCA1","CREBBP","STAT1"]
CH000000820	TLR3 pathway	6	42	5.45763	0.469817	0.71638	["ENSG00000005339","ENSG00000055130","ENSG00000100393","ENSG00000109332","ENSG00000177606","ENSG00000177889"]	["CREBBP","CUL1","EP300","JUN","UBE2D3","UBE2N"]
CH000000578	fMLP ---> NF-AT2	4	27	3.50847	0.473327	0.71638	["ENSG00000138814","ENSG00000143933","ENSG00000198668","ENSG00000221823"]	["CALM1","CALM2","PPP3CA","PPP3R1"]
CH000004295	oxidation of phytanic acid and pristanic acid	4	27	3.50847	0.473327	0.71638	["ENSG00000068366","ENSG00000072210","ENSG00000123983","ENSG00000164904"]	["ACSL3","ACSL4","ALDH3A2","ALDH7A1"]
CH000000724	EGF ---> ERK	2	12	1.55932	0.474999	0.71638	["ENSG00000100030","ENSG00000115904"]	["MAPK1","SOS1"]
CH000000827	ZAP-70 ---> c-Jun	2	12	1.55932	0.474999	0.71638	["ENSG00000010810","ENSG00000177606"]	["FYN","JUN"]
CH000000873	MEK ---> ABP-280	2	12	1.55932	0.474999	0.71638	["ENSG00000069956","ENSG00000100030"]	["MAPK1","MAPK6"]
CH000003692	cytidine 5'-phosphate ---> RNA-P-C	2	12	1.55932	0.474999	0.71638	["ENSG00000167325","ENSG00000171848"]	["RRM1","RRM2"]
CH000001012	ARIP1 ---> atrophin1	3	20	2.59887	0.492337	0.71638	["ENSG00000035403","ENSG00000147044","ENSG00000168036"]	["CASK","CTNNB1","VCL"]
CH000003669	cholesterol metabolism	3	20	2.59887	0.492337	0.71638	["ENSG00000104549","ENSG00000112972","ENSG00000113161"]	["HMGCR","HMGCS1","SQLE"]
CH000004716	ID complex ubiquitination	3	20	2.59887	0.492337	0.71638	["ENSG00000077152","ENSG00000140525","ENSG00000144554"]	["FANCD2","FANCI","UBE2T"]
CH000000071	cyclin D1(h):Cdk4(h) ---> p107(h){p}	1	5	0.649718	0.501768	0.71638	["ENSG00000198176"]	["TFDP1"]
CH000000072	cyclin D3(h):Cdk4(h) ---> p107(h){p}	1	5	0.649718	0.501768	0.71638	["ENSG00000198176"]	["TFDP1"]
CH000000123	Ubc9 ---> IkappaB-alpha	1	5	0.649718	0.501768	0.71638	["ENSG00000116030"]	["SUMO1"]
CH000000126	BMP7:BMPR-II:BMPR-IB ---> Smad1	1	5	0.649718	0.501768	0.71638	["ENSG00000170365"]	["SMAD1"]
CH000000154	MEKK1 ---> JNK	1	5	0.649718	0.501768	0.71638	["ENSG00000136810"]	["TXN"]
CH000000156	MKK4 ---> JNK	1	5	0.649718	0.501768	0.71638	["ENSG00000136810"]	["TXN"]
CH000000292	CKII, SUPT16H, SSRP1 complex formation	1	5	0.649718	0.501768	0.71638	["ENSG00000092201"]	["SUPT16H"]
CH000000293	CKII-alpha2:CKII-beta:SUPT16H:SSRP1 ---> p53	1	5	0.649718	0.501768	0.71638	["ENSG00000092201"]	["SUPT16H"]
CH000000360	CH000000360	1	5	0.649718	0.501768	0.71638	["ENSG00000166913"]	["YWHAB"]
CH000000510	MEKK4 ---MKK6---> ATF-2	1	5	0.649718	0.501768	0.71638	["ENSG00000085511"]	["MAP3K4"]
CH000000551	Epo ---> H-Ras	1	5	0.649718	0.501768	0.71638	["ENSG00000254087"]	["LYN"]
CH000000615	Rac1 ---> NUDEL, amphiphysin I	1	5	0.649718	0.501768	0.71638	["ENSG00000166579"]	["NDEL1"]
CH000000709	ATM ---/ Cdc25	1	5	0.649718	0.501768	0.71638	["ENSG00000158402"]	["CDC25C"]
CH000000812	DLK ---> c-Jun	1	5	0.649718	0.501768	0.71638	["ENSG00000177606"]	["JUN"]
CH000000813	ASK1 ---DUSP19---> c-Jun	1	5	0.649718	0.501768	0.71638	["ENSG00000177606"]	["JUN"]
CH000000834	JNK1 ---> Bax	1	5	0.649718	0.501768	0.71638	["ENSG00000164924"]	["YWHAZ"]
CH000000861	beta-arrestin2 ---> c-Jun	1	5	0.649718	0.501768	0.71638	["ENSG00000177606"]	["JUN"]
CH000000871	EGF ---> PLD2	1	5	0.649718	0.501768	0.71638	["ENSG00000168374"]	["ARF4"]
CH000000872	Unc18-1 ---/ PLD2	1	5	0.649718	0.501768	0.71638	["ENSG00000168374"]	["ARF4"]
CH000000880	Caspase-3 ---/ Bcl-2	1	5	0.649718	0.501768	0.71638	["ENSG00000167552"]	["TUBA1A"]
CH000000886	Fas ---/ SRF	1	5	0.649718	0.501768	0.71638	["ENSG00000172115"]	["CYCS"]
CH000000907	Cdk1, Plk1 ---/ cyclin B	1	5	0.649718	0.501768	0.71638	["ENSG00000170312"]	["CDK1"]
CH000000915	Caspase-3 ---/ CREB-341	1	5	0.649718	0.501768	0.71638	["ENSG00000172115"]	["CYCS"]
CH000000986	p53 ---> cytochrome C	1	5	0.649718	0.501768	0.71638	["ENSG00000172115"]	["CYCS"]
CH000000991	CKII ---> AP-1	1	5	0.649718	0.501768	0.71638	["ENSG00000136810"]	["TXN"]
CH000001008	serotonin ---> ARIP1	1	5	0.649718	0.501768	0.71638	["ENSG00000147044"]	["CASK"]
CH000003548	PIAS1 ---SUMO-1---/ AR	1	5	0.649718	0.501768	0.71638	["ENSG00000033800"]	["PIAS1"]
CH000003572	fatty acid synthesis	1	5	0.649718	0.501768	0.71638	["ENSG00000131238"]	["PPT1"]
CH000003611	fumarate ---> oxoglutarate, L-aspartate	1	5	0.649718	0.501768	0.71638	["ENSG00000014641"]	["MDH1"]
CH000003660	pyruvate ---> acetylcoA	1	5	0.649718	0.501768	0.71638	["ENSG00000168291"]	["PDHB"]
CH000003777	glucose-1-p ---> D-glucuronate	1	5	0.649718	0.501768	0.71638	["ENSG00000169764"]	["UGP2"]
CH000003843	PGH2 ---> prostaglandin F2-alpha	1	5	0.649718	0.501768	0.71638	["ENSG00000110958"]	["PTGES3"]
CH000003901	Nedd4 ---> trkA	1	5	0.649718	0.501768	0.71638	["ENSG00000049759"]	["NEDD4L"]
CH000003941	D1 ---Fyn---> (NR1:NR2B)2	1	5	0.649718	0.501768	0.71638	["ENSG00000010810"]	["FYN"]
CH000004327	acetyl-CoA, malonyl-CoA ---> lignoceric acid	1	5	0.649718	0.501768	0.71638	["ENSG00000170522"]	["ELOVL6"]
CH000004529	APG7 ---APG10--->APG16L:APG5:APG12	1	5	0.649718	0.501768	0.71638	["ENSG00000145782"]	["ATG12"]
CH000004571	sestrin2 ---AMPKalpha---> tuberin	1	5	0.649718	0.501768	0.71638	["ENSG00000165699"]	["TSC1"]
CH000004584	tyrosine dephosphorylation of plakoglobin	1	5	0.649718	0.501768	0.71638	["ENSG00000198561"]	["CTNND1"]
CH000004650	AT2 receptor --->Mms2	1	5	0.649718	0.501768	0.71638	["ENSG00000169139"]	["UBE2V2"]
CH000004656	ERK1 ---> NQO1	1	5	0.649718	0.501768	0.71638	["ENSG00000005339"]	["CREBBP"]
CH000004659	TGFbeta1 ---ALK-1---> Smad1	1	5	0.649718	0.501768	0.71638	["ENSG00000170365"]	["SMAD1"]
CH000004685	UV ---> ERK1, ERK2	1	5	0.649718	0.501768	0.71638	["ENSG00000100030"]	["MAPK1"]
CH000000763	c-Kit pathway	2	13	1.68927	0.51897	0.730669	["ENSG00000100030","ENSG00000100393"]	["EP300","MAPK1"]
CH000003690	L-isoleucine ---> propionyl-CoA, acetyl-CoA	2	13	1.68927	0.51897	0.730669	["ENSG00000060982","ENSG00000117054"]	["ACADM","BCAT1"]
CH000004196	NR2B:NR2C ---CaMKII---> c-Fos	2	13	1.68927	0.51897	0.730669	["ENSG00000143933","ENSG00000198668"]	["CALM1","CALM2"]
CH000004197	Emi1 ---Fzr1---/ cyclosome	2	13	1.68927	0.51897	0.730669	["ENSG00000004897","ENSG00000112029"]	["CDC27","FBXO5"]
CH000004199	Emi1 ---Cdc20---/ cyclosome	2	13	1.68927	0.51897	0.730669	["ENSG00000004897","ENSG00000112029"]	["CDC27","FBXO5"]
CH000004232	AMPA receptor signaling	2	13	1.68927	0.51897	0.730669	["ENSG00000143933","ENSG00000198668"]	["CALM1","CALM2"]
CH000004729	repression by DREAM complex	2	13	1.68927	0.51897	0.730669	["ENSG00000162521","ENSG00000198176"]	["RBBP4","TFDP1"]
CH000003636	urea and aspartate cycles, polyamine and creatine synthesis	3	21	2.72881	0.526546	0.736958	["ENSG00000014641","ENSG00000102172","ENSG00000115758"]	["MDH1","ODC1","SMS"]
CH000003645	acetyl-CoA, acetoacetyl-CoA ---> cholesterol, fatty acid	3	21	2.72881	0.526546	0.736958	["ENSG00000104549","ENSG00000112972","ENSG00000113161"]	["HMGCR","HMGCS1","SQLE"]
CH000004456	NOS regulation	3	21	2.72881	0.526546	0.736958	["ENSG00000080824","ENSG00000143933","ENSG00000198668"]	["CALM1","CALM2","HSP90AA1"]
CH000000754	fMLP pathway	6	45	5.84746	0.540637	0.753079	["ENSG00000069956","ENSG00000100030","ENSG00000138814","ENSG00000143933","ENSG00000198668","ENSG00000221823"]	["CALM1","CALM2","MAPK1","MAPK6","PPP3CA","PPP3R1"]
CH000003912	neurotrophic signaling	12	92	11.9548	0.543182	0.753079	["ENSG00000049759","ENSG00000087460","ENSG00000100030","ENSG00000108946","ENSG00000110958","ENSG00000114302","ENSG00000115904","ENSG00000133703","ENSG00000151694","ENSG00000163558","ENSG00000172115","ENSG00000213281"]	["ADAM17","CYCS","GNAS","KRAS","MAPK1","NEDD4L","NRAS","PRKAR1A","PRKAR2A","PRKCI","PTGES3","SOS1"]
CH000000831	LPS ---> IRF-3:IRF-7:CBP:p300	2	14	1.81921	0.560423	0.753079	["ENSG00000005339","ENSG00000100393"]	["CREBBP","EP300"]
CH000004641	regulation of mesendoderm differentiation genes	2	14	1.81921	0.560423	0.753079	["ENSG00000175387","ENSG00000196591"]	["HDAC2","SMAD2"]
CH000000023	CD2 ---/ stathmin	1	6	0.779661	0.566663	0.753079	["ENSG00000117632"]	["STMN1"]
CH000000025	IFNalpha ---> STAT1alpha	1	6	0.779661	0.566663	0.753079	["ENSG00000115415"]	["STAT1"]
CH000000040	insulin ---> PtdIns(3)P	1	6	0.779661	0.566663	0.753079	["ENSG00000166913"]	["YWHAB"]
CH000000249	MTAIL1 ---> p53	1	6	0.779661	0.566663	0.753079	["ENSG00000162521"]	["RBBP4"]
CH000000250	MTA1L1:Mi2-BETA:HDAC1:RbAp48:mbd3 ---> p53	1	6	0.779661	0.566663	0.753079	["ENSG00000162521"]	["RBBP4"]
CH000000649	PDGF B ---> STATs	1	6	0.779661	0.566663	0.753079	["ENSG00000115415"]	["STAT1"]
CH000000680	activin A ---> Smad3	1	6	0.779661	0.566663	0.753079	["ENSG00000157077"]	["ZFYVE9"]
CH000000731	EGF ---> PI3K-C2beta	1	6	0.779661	0.566663	0.753079	["ENSG00000011405"]	["PIK3C2A"]
CH000000734	VEGF-A ---> Sos	1	6	0.779661	0.566663	0.753079	["ENSG00000115904"]	["SOS1"]
CH000000779	Csk, CD45 ---> Fyn	1	6	0.779661	0.566663	0.753079	["ENSG00000010810"]	["FYN"]
CH000003608	chitin ---> N-acetyl-D-glucosamine 6-P	1	6	0.779661	0.566663	0.753079	["ENSG00000198408"]	["OGA"]
CH000003670	3-phospho-D-glycerate ---> glycine, 5,10-methylene-THF	1	6	0.779661	0.566663	0.753079	["ENSG00000135069"]	["PSAT1"]
CH000003676	aspartate and asparagine metabolism	1	6	0.779661	0.566663	0.753079	["ENSG00000162174"]	["ASRGL1"]
CH000004176	UbcH7 ---parkin---> Eps15	1	6	0.779661	0.566663	0.753079	["ENSG00000085832"]	["EPS15"]
CH000004324	fatty acid chain elongation	1	6	0.779661	0.566663	0.753079	["ENSG00000149084"]	["HSD17B12"]
CH000004325	acyl-CoA, malonyl-CoA ---> fatty acyl-CoA	1	6	0.779661	0.566663	0.753079	["ENSG00000149084"]	["HSD17B12"]
CH000004482	Bad ---> 14-3-3	1	6	0.779661	0.566663	0.753079	["ENSG00000134308"]	["YWHAQ"]
CH000004528	APG4B ---APG5,APG12--->LC3B	1	6	0.779661	0.566663	0.753079	["ENSG00000140941"]	["MAP1LC3B"]
CH000004568	EGF ---> Rac activation	1	6	0.779661	0.566663	0.753079	["ENSG00000115904"]	["SOS1"]
CH000004653	AT2 receptor ---/ ERK1/2	1	6	0.779661	0.566663	0.753079	["ENSG00000100030"]	["MAPK1"]
CH000004657	Nrf2 ---> HMOX1	1	6	0.779661	0.566663	0.753079	["ENSG00000005339"]	["CREBBP"]
CH000004701	TGFbeta1 ---> MCP-1(CCL2)	1	6	0.779661	0.566663	0.753079	["ENSG00000157077"]	["ZFYVE9"]
CH000004728	MMB	1	6	0.779661	0.566663	0.753079	["ENSG00000162521"]	["RBBP4"]
CH000000651	Insulin ---> AKT-1 pathway	5	39	5.0678	0.585893	0.777183	["ENSG00000049759","ENSG00000158528","ENSG00000166913","ENSG00000186298","ENSG00000213639"]	["NEDD4L","PPP1CB","PPP1CC","PPP1R9A","YWHAB"]
CH000000726	Eps15 ---> ErbB internalization	2	15	1.94915	0.599267	0.780012	["ENSG00000085832","ENSG00000141367"]	["CLTC","EPS15"]
CH000004648	angiotensin	10	80	10.3955	0.605331	0.780012	["ENSG00000100030","ENSG00000100393","ENSG00000115415","ENSG00000143933","ENSG00000151247","ENSG00000156052","ENSG00000163558","ENSG00000169139","ENSG00000198176","ENSG00000198668"]	["CALM1","CALM2","EIF4E","EP300","GNAQ","MAPK1","PRKCI","STAT1","TFDP1","UBE2V2"]
CH000004394	VDR network	6	48	6.23729	0.607093	0.780012	["ENSG00000047315","ENSG00000100393","ENSG00000100603","ENSG00000125686","ENSG00000132475","ENSG00000163041"]	["EP300","H3-3A","H3-3B","MED1","POLR2B","SNW1"]
CH000000030	EGF ---> ERK1, ERK2	1	7	0.909605	0.623132	0.780012	["ENSG00000115904"]	["SOS1"]
CH000000579	IL-10 ---> STAT1alpha, STAT3	1	7	0.909605	0.623132	0.780012	["ENSG00000115415"]	["STAT1"]
CH000000584	IL-22 ---> STAT1alpha, STAT3	1	7	0.909605	0.623132	0.780012	["ENSG00000115415"]	["STAT1"]
CH000000606	CD19 ---> PLCgamma2	1	7	0.909605	0.623132	0.780012	["ENSG00000254087"]	["LYN"]
CH000000761	IL-10 pathway	1	7	0.909605	0.623132	0.780012	["ENSG00000115415"]	["STAT1"]
CH000000762	IL-22 pathway	1	7	0.909605	0.623132	0.780012	["ENSG00000115415"]	["STAT1"]
CH000000785	EDAR ---> TRAF2	1	7	0.909605	0.623132	0.780012	["ENSG00000177889"]	["UBE2N"]
CH000000836	JIP-1 ---> APP	1	7	0.909605	0.623132	0.780012	["ENSG00000142192"]	["APP"]
CH000000862	JNK1 ---> MKK4	1	7	0.909605	0.623132	0.780012	["ENSG00000163349"]	["HIPK1"]
CH000000878	Src ---/ RhoA	1	7	0.909605	0.623132	0.780012	["ENSG00000160007"]	["ARHGAP35"]
CH000000910	Fas ---/ PRK2	1	7	0.909605	0.623132	0.780012	["ENSG00000065243"]	["PKN2"]
CH000000920	Fas ---/ Cdc42	1	7	0.909605	0.623132	0.780012	["ENSG00000070831"]	["CDC42"]
CH000000971	p73alpha ---/ NF-Y	1	7	0.909605	0.623132	0.780012	["ENSG00000100393"]	["EP300"]
CH000003618	[R]-pantothenate ---> CoA	1	7	0.909605	0.623132	0.780012	["ENSG00000127125"]	["PPCS"]
CH000003655	biosynthesis of pantothenate and coenzyme A	1	7	0.909605	0.623132	0.780012	["ENSG00000127125"]	["PPCS"]
CH000003681	H2SO4 ---> AMP	1	7	0.909605	0.623132	0.780012	["ENSG00000138801"]	["PAPSS1"]
CH000003814	pantothenate ---> CoA	1	7	0.909605	0.623132	0.780012	["ENSG00000127125"]	["PPCS"]
CH000003815	biosynthesis of pantothenate, coenzyme A and holo-acyl carrier protein	1	7	0.909605	0.623132	0.780012	["ENSG00000127125"]	["PPCS"]
CH000004336	PtdIns ---> PtdIns(3,5)P2	1	7	0.909605	0.623132	0.780012	["ENSG00000276293"]	["PIP4K2B (ENSG00000276293)"]
CH000004505	IL-5 ---> STAT5	1	7	0.909605	0.623132	0.780012	["ENSG00000137575"]	["SDCBP"]
CH000004509	SOCS-1 ---/ IL-5	1	7	0.909605	0.623132	0.780012	["ENSG00000137575"]	["SDCBP"]
CH000004513	IL-5 ---Lyn, dynamin2--/ ERK	1	7	0.909605	0.623132	0.780012	["ENSG00000254087"]	["LYN"]
CH000004531	mTOR ---/ ulk1	1	7	0.909605	0.623132	0.780012	["ENSG00000023287"]	["RB1CC1"]
CH000004556	IL-16	1	7	0.909605	0.623132	0.780012	["ENSG00000104064"]	["GABPB1"]
CH000004567	parkin ---> IKK-gamma	1	7	0.909605	0.623132	0.780012	["ENSG00000177889"]	["UBE2N"]
CH000004605	Smad7 ---YAP---/ TGFbeta1 signaling	1	7	0.909605	0.623132	0.780012	["ENSG00000137693"]	["YAP1"]
CH000004621	NF-AT5 regulation	1	7	0.909605	0.623132	0.780012	["ENSG00000113712"]	["CSNK1A1"]
CH000004624	MIC2-isoform2 ---JNK, JunD---> MMP9	1	7	0.909605	0.623132	0.780012	["ENSG00000177606"]	["JUN"]
CH000004649	AT1A ---> STAT1, STAT3	1	7	0.909605	0.623132	0.780012	["ENSG00000115415"]	["STAT1"]
CH000000755	TLR4 pathway	7	57	7.40678	0.625336	0.781395	["ENSG00000005339","ENSG00000055130","ENSG00000100030","ENSG00000100393","ENSG00000109332","ENSG00000115415","ENSG00000177889"]	["CREBBP","CUL1","EP300","MAPK1","STAT1","UBE2D3","UBE2N"]
CH000000064	RhoA ---> myosin	2	16	2.0791	0.635478	0.789904	["ENSG00000133026","ENSG00000134318"]	["MYH10","ROCK2"]
CH000000659	VEGF-A ---> PLA2	2	16	2.0791	0.635478	0.789904	["ENSG00000069956","ENSG00000100030"]	["MAPK1","MAPK6"]
CH000004297	pristanic acid ---> 2,6-dimethylheptanoyl-CoA	2	16	2.0791	0.635478	0.789904	["ENSG00000068366","ENSG00000123983"]	["ACSL3","ACSL4"]
CH000003667	citrate cycle	3	25	3.24859	0.64943	0.793988	["ENSG00000014641","ENSG00000138413","ENSG00000148672"]	["GLUD1","IDH1","MDH1"]
CH000000736	PDGF pathway	7	59	7.66667	0.662733	0.793988	["ENSG00000069956","ENSG00000100030","ENSG00000115415","ENSG00000115904","ENSG00000133703","ENSG00000163558","ENSG00000213281"]	["KRAS","MAPK1","MAPK6","NRAS","PRKCI","SOS1","STAT1"]
CH000004647	angiotensin II ---> DAG, CaMKII	4	34	4.41808	0.66278	0.793988	["ENSG00000143933","ENSG00000156052","ENSG00000163558","ENSG00000198668"]	["CALM1","CALM2","GNAQ","PRKCI"]
CH000000572	LPS ---> p38	2	17	2.20904	0.669083	0.793988	["ENSG00000115415","ENSG00000177889"]	["STAT1","UBE2N"]
CH000003781	interconversion and degradation of purine deoxyribonucleotides	2	17	2.20904	0.669083	0.793988	["ENSG00000167325","ENSG00000171848"]	["RRM1","RRM2"]
CH000004675	EP2 ---> VEGFA	2	17	2.20904	0.669083	0.793988	["ENSG00000087460","ENSG00000110958"]	["GNAS","PTGES3"]
CH000000038	insulin ---> ERK	1	8	1.03955	0.672265	0.793988	["ENSG00000115904"]	["SOS1"]
CH000000047	insulin ---> GLUT4	1	8	1.03955	0.672265	0.793988	["ENSG00000095637"]	["SORBS1"]
CH000000485	TNF-alpha ---> c-Jun	1	8	1.03955	0.672265	0.793988	["ENSG00000177606"]	["JUN"]
CH000000696	BMP2 ---> p38alpha	1	8	1.03955	0.672265	0.793988	["ENSG00000101966"]	["XIAP"]
CH000000725	c-Cbl ---/ ErbB1	1	8	1.03955	0.672265	0.793988	["ENSG00000147010"]	["SH3KBP1"]
CH000000780	EDA-A2 ---> c-Jun	1	8	1.03955	0.672265	0.793988	["ENSG00000177606"]	["JUN"]
CH000000815	POSH ---> JNK1, JNK2	1	8	1.03955	0.672265	0.793988	["ENSG00000177606"]	["JUN"]
CH000000884	Caspase-9 ---> Caspases	1	8	1.03955	0.672265	0.793988	["ENSG00000172115"]	["CYCS"]
CH000000927	non-amyloidogenic APP pathway	1	8	1.03955	0.672265	0.793988	["ENSG00000142192"]	["APP"]
CH000000961	E1 ---/ ErbB3	1	8	1.03955	0.672265	0.793988	["ENSG00000109332"]	["UBE2D3"]
CH000000963	E1 ---Siah-1---/ synphilin-1	1	8	1.03955	0.672265	0.793988	["ENSG00000109332"]	["UBE2D3"]
CH000000964	E1 ---Siah-2---/ synphilin-1	1	8	1.03955	0.672265	0.793988	["ENSG00000109332"]	["UBE2D3"]
CH000000999	EGF ---> c-Fos	1	8	1.03955	0.672265	0.793988	["ENSG00000100030"]	["MAPK1"]
CH000003568	glucose-1-p ---> UDP-D-galactose	1	8	1.03955	0.672265	0.793988	["ENSG00000169764"]	["UGP2"]
CH000003585	lactose metabolism	1	8	1.03955	0.672265	0.793988	["ENSG00000169764"]	["UGP2"]
CH000003600	L-glutamate ---ammonia---> 2-oxoglutarate	1	8	1.03955	0.672265	0.793988	["ENSG00000148672"]	["GLUD1"]
CH000003616	L-proline, 2-oxoglutarate ---> D-4-hydroxy-2-oxoglutarate, L-glutamate	1	8	1.03955	0.672265	0.793988	["ENSG00000122884"]	["P4HA1"]
CH000003842	arachidonic acid ---> PGJ2, 15d-PGJ2	1	8	1.03955	0.672265	0.793988	["ENSG00000110958"]	["PTGES3"]
CH000003934	non-amyloidogenic epsilon cleavage	1	8	1.03955	0.672265	0.793988	["ENSG00000142192"]	["APP"]
CH000004317	platelet-activating factor ---> fatty aldehyde	1	8	1.03955	0.672265	0.793988	["ENSG00000168092"]	["PAFAH1B2"]
CH000004350	TNF ---MEKK1---> c-Jun	1	8	1.03955	0.672265	0.793988	["ENSG00000177606"]	["JUN"]
CH000004422	taspase1 ---ALL1---> menin	1	8	1.03955	0.672265	0.793988	["ENSG00000118058"]	["KMT2A"]
CH000004623	MIC2-isoform2 ---FosB---> MMP9	1	8	1.03955	0.672265	0.793988	["ENSG00000100030"]	["MAPK1"]
CH000004652	AT1A ---beta-arrestin2---> bad	1	8	1.03955	0.672265	0.793988	["ENSG00000100030"]	["MAPK1"]
CH000003628	gluconeogenesis	5	43	5.58757	0.675254	0.796196	["ENSG00000072210","ENSG00000111716","ENSG00000134333","ENSG00000135069","ENSG00000164904"]	["ALDH3A2","ALDH7A1","LDHA (ENSG00000134333)","LDHB","PSAT1"]
CH000004501	leptin signaling	5	44	5.71751	0.695487	0.818694	["ENSG00000100030","ENSG00000100644","ENSG00000115904","ENSG00000133703","ENSG00000213281"]	["HIF1A","KRAS","MAPK1","NRAS","SOS1"]
CH000000821	TBK1:TRIF:IKK-i ---> p50:RelA	2	18	2.33898	0.700145	0.821458	["ENSG00000055130","ENSG00000109332"]	["CUL1","UBE2D3"]
CH000000869	p73 pathway 6	2	18	2.33898	0.700145	0.821458	["ENSG00000100393","ENSG00000189403"]	["EP300","HMGB1"]
CH000000050	insulin ---> alphaENaC	1	9	1.16949	0.715013	0.822612	["ENSG00000049759"]	["NEDD4L"]
CH000000550	gamma-secretase ---> Fe65	1	9	1.16949	0.715013	0.822612	["ENSG00000142192"]	["APP"]
CH000000616	Rac1 ---> c-Jun, Elk-1	1	9	1.16949	0.715013	0.822612	["ENSG00000177606"]	["JUN"]
CH000000632	PDGF A, PDGF B ---> ERK1, ERK2	1	9	1.16949	0.715013	0.822612	["ENSG00000115904"]	["SOS1"]
CH000000938	PRL ---Fyn---> PI3K	1	9	1.16949	0.715013	0.822612	["ENSG00000010810"]	["FYN"]
CH000001019	Shh ---> internalization of Smo	1	9	1.16949	0.715013	0.822612	["ENSG00000141367"]	["CLTC"]
CH000003591	dehydroepiandrosterone ---> estriol 16-glucuronide	1	9	1.16949	0.715013	0.822612	["ENSG00000149084"]	["HSD17B12"]
CH000003622	UDP-glucose ---> D-glucose	1	9	1.16949	0.715013	0.822612	["ENSG00000169764"]	["UGP2"]
CH000003654	glycogen degradation	1	9	1.16949	0.715013	0.822612	["ENSG00000169764"]	["UGP2"]
CH000003697	2'-deoxycytidine-5'-phosphate ---> 2'-deoxyuridine 5'-phosphate	1	9	1.16949	0.715013	0.822612	["ENSG00000128951"]	["DUT"]
CH000004494	IFNalpha, IFNbeta ---> STAT3	1	9	1.16949	0.715013	0.822612	["ENSG00000115415"]	["STAT1"]
CH000004573	LPS ---Rac1, ERK---> IL-1RA	1	9	1.16949	0.715013	0.822612	["ENSG00000100030"]	["MAPK1"]
CH000000802	G-alpha-q ---> arachidonic acid, ERK	3	28	3.63842	0.725583	0.829032	["ENSG00000069956","ENSG00000100030","ENSG00000156052"]	["GNAQ","MAPK1","MAPK6"]
CH000000824	dsRNA ---> p50:RelA	2	19	2.46893	0.728756	0.829032	["ENSG00000055130","ENSG00000109332"]	["CUL1","UBE2D3"]
CH000003665	biosynthesis of glycerophospholipids	2	19	2.46893	0.728756	0.829032	["ENSG00000110721","ENSG00000161217"]	["CHKA","PCYT1A"]
CH000003691	tyrosine metabolism	2	19	2.46893	0.728756	0.829032	["ENSG00000072210","ENSG00000164904"]	["ALDH3A2","ALDH7A1"]
CH000003704	metabolism of branched chain amino acids	2	19	2.46893	0.728756	0.829032	["ENSG00000060982","ENSG00000117054"]	["ACADM","BCAT1"]
CH000003752	degradation of tryptophan	2	19	2.46893	0.728756	0.829032	["ENSG00000072210","ENSG00000164904"]	["ALDH3A2","ALDH7A1"]
CH000004192	NRG ---> ERK	2	19	2.46893	0.728756	0.829032	["ENSG00000100030","ENSG00000115904"]	["MAPK1","SOS1"]
CH000000592	MHC class I ---> LAT, SLP-76	1	10	1.29944	0.752203	0.842231	["ENSG00000010810"]	["FYN"]
CH000000593	IFNgamma ---> STAT1alpha	1	10	1.29944	0.752203	0.842231	["ENSG00000115415"]	["STAT1"]
CH000000598	APP processing and nuclear translocation	1	10	1.29944	0.752203	0.842231	["ENSG00000142192"]	["APP"]
CH000000792	CXCR1 internalization via clathrin-coated pits	1	10	1.29944	0.752203	0.842231	["ENSG00000141367"]	["CLTC"]
CH000000901	Epo ---> ERK1	1	10	1.29944	0.752203	0.842231	["ENSG00000254087"]	["LYN"]
CH000003710	proline and hydroxy proline metabolism	1	10	1.29944	0.752203	0.842231	["ENSG00000122884"]	["P4HA1"]
CH000003760	IMP ---> GTP	1	10	1.29944	0.752203	0.842231	["ENSG00000163655"]	["GMPS"]
CH000003790	fatty acid oxidation	1	10	1.29944	0.752203	0.842231	["ENSG00000120437"]	["ACAT2"]
CH000004543	IRAK-1 ---MKK4---> TNF	1	10	1.29944	0.752203	0.842231	["ENSG00000177606"]	["JUN"]
CH000004687	ErbB4, ligand-depending processing	1	10	1.29944	0.752203	0.842231	["ENSG00000151694"]	["ADAM17"]
CH000004428	L-serine, palmityl-CoA ---> SM, ceramide-1-phosphate	2	20	2.59887	0.755024	0.84406	["ENSG00000100422","ENSG00000119537"]	["CERK","KDSR"]
CH000000590	LAT ---> p50:RelA	2	21	2.72881	0.779075	0.868216	["ENSG00000055130","ENSG00000109332"]	["CUL1","UBE2D3"]
CH000003566	citrate cycle	2	21	2.72881	0.779075	0.868216	["ENSG00000014641","ENSG00000138413"]	["IDH1","MDH1"]
CH000000611	BCR ---> p38	1	11	1.42938	0.784555	0.868876	["ENSG00000085511"]	["MAP3K4"]
CH000000612	BCR ---MLK3---> c-Jun	1	11	1.42938	0.784555	0.868876	["ENSG00000177606"]	["JUN"]
CH000000825	dsRNA ---> c-Jun	1	11	1.42938	0.784555	0.868876	["ENSG00000177606"]	["JUN"]
CH000004668	AT2 ---> E2F1	1	11	1.42938	0.784555	0.868876	["ENSG00000198176"]	["TFDP1"]
CH000000569	LPS _> NF_kappaB 6	3	31	4.02825	0.78821	0.871566	["ENSG00000055130","ENSG00000109332","ENSG00000177889"]	["CUL1","UBE2D3","UBE2N"]
CH000003693	cytidine 5'-phosphate ---> RNA-P-U	2	22	2.85876	0.801037	0.881637	["ENSG00000167325","ENSG00000171848"]	["RRM1","RRM2"]
CH000004481	IL-3 ---AKT-1---/ LNC2	2	22	2.85876	0.801037	0.881637	["ENSG00000010810","ENSG00000164924"]	["FYN","YWHAZ"]
CH000004703	MCP-1 (/CCL2) network	2	22	2.85876	0.801037	0.881637	["ENSG00000156052","ENSG00000157077"]	["GNAQ","ZFYVE9"]
CH000000654	Insulin ---> glucose uptake	1	12	1.55932	0.812696	0.887599	["ENSG00000095637"]	["SORBS1"]
CH000000956	E1 ---/ alpha-tubulin	1	12	1.55932	0.812696	0.887599	["ENSG00000167552"]	["TUBA1A"]
CH000003796	androstenedione ---> estrone glucuronide	1	12	1.55932	0.812696	0.887599	["ENSG00000149084"]	["HSD17B12"]
CH000003797	metabolism of estrogens	1	12	1.55932	0.812696	0.887599	["ENSG00000149084"]	["HSD17B12"]
CH000004303	NGF ---p75NTR---> p50:RelA-p65	1	12	1.55932	0.812696	0.887599	["ENSG00000163558"]	["PRKCI"]
CH000004694	ErbB4 mediated signaling	2	23	2.9887	0.821047	0.895344	["ENSG00000137693","ENSG00000151694"]	["ADAM17","YAP1"]
CH000000746	IL_1 pathway 1	4	43	5.58757	0.830049	0.901864	["ENSG00000055130","ENSG00000109332","ENSG00000177606","ENSG00000177889"]	["CUL1","JUN","UBE2D3","UBE2N"]
CH000000849	p38 pathway 4	4	43	5.58757	0.830049	0.901864	["ENSG00000085511","ENSG00000111266","ENSG00000151247","ENSG00000160551"]	["DUSP16 (ENSG00000111266)","EIF4E","MAP3K4","TAOK1"]
CH000000801	NT ---> Gq	1	13	1.68927	0.837174	0.901864	["ENSG00000156052"]	["GNAQ"]
CH000000903	Jagged1,2 ---> JICD1,2	1	13	1.68927	0.837174	0.901864	["ENSG00000151694"]	["ADAM17"]
CH000001022	Sonic Hedgehog pathway	1	13	1.68927	0.837174	0.901864	["ENSG00000141367"]	["CLTC"]
CH000003673	serine metabolism	1	13	1.68927	0.837174	0.901864	["ENSG00000135069"]	["PSAT1"]
CH000004229	BDNF ---p75NTR---> NRIF ubiquitination	1	13	1.68927	0.837174	0.901864	["ENSG00000151694"]	["ADAM17"]
CH000004478	IL-3 ---> c-CBL, PI3K	1	13	1.68927	0.837174	0.901864	["ENSG00000010810"]	["FYN"]
CH000000697	IL-1beta ---> p50:RelA	3	35	4.54802	0.852866	0.916466	["ENSG00000055130","ENSG00000109332","ENSG00000177889"]	["CUL1","UBE2D3","UBE2N"]
CH000000939	PRL ---PI3K---> AKT	1	14	1.81921	0.858462	0.916466	["ENSG00000010810"]	["FYN"]
CH000003792	fatty acid oxidation	1	14	1.81921	0.858462	0.916466	["ENSG00000120437"]	["ACAT2"]
CH000003853	DAG ---> PtdIns(3,4)P2	1	14	1.81921	0.858462	0.916466	["ENSG00000276293"]	["PIP4K2B (ENSG00000276293)"]
CH000004544	IRAK-1 ---MKK3---> TNF	1	14	1.81921	0.858462	0.916466	["ENSG00000177606"]	["JUN"]
CH000004697	CCR2 signaling	1	14	1.81921	0.858462	0.916466	["ENSG00000156052"]	["GNAQ"]
CH000004669	estradiol ---> PRLR	3	36	4.67797	0.866074	0.923206	["ENSG00000100393","ENSG00000132475","ENSG00000163041"]	["EP300","H3-3A","H3-3B"]
CH000000759	EDAR pathway	2	26	3.37853	0.870691	0.926738	["ENSG00000177606","ENSG00000177889"]	["JUN","UBE2N"]
CH000000823	dsRNA ---> IKK-alpha:IKK-beta{p}:IKK-gamma	1	15	1.94915	0.876976	0.928329	["ENSG00000177889"]	["UBE2N"]
CH000003759	IMP ---> ADP	1	15	1.94915	0.876976	0.928329	["ENSG00000035687"]	["ADSS2"]
CH000004321	alkyl-DHAP ---> alkylacylglycerol	1	15	1.94915	0.876976	0.928329	["ENSG00000155189"]	["AGPAT5 (ENSG00000155189)"]
CH000000570	wnt ---> beta-catenin	2	27	3.50847	0.884206	0.928329	["ENSG00000155760","ENSG00000168036"]	["CTNNB1","FZD7"]
CH000004427	sphingolipid metabolism	2	27	3.50847	0.884206	0.928329	["ENSG00000100422","ENSG00000119537"]	["CERK","KDSR"]
CH000003701	interconversion and degradation of pyrimidine nucleotides and bases	3	38	4.93785	0.8894	0.928329	["ENSG00000128951","ENSG00000167325","ENSG00000171848"]	["DUT","RRM1","RRM2"]
CH000000601	Delta ---Notch1---> NICD1	1	16	2.0791	0.893076	0.928329	["ENSG00000151694"]	["ADAM17"]
CH000000610	BCR ---> c-Jun	1	16	2.0791	0.893076	0.928329	["ENSG00000177606"]	["JUN"]
CH000000904	Jagged1 ---Notch1---> NICD1	1	16	2.0791	0.893076	0.928329	["ENSG00000151694"]	["ADAM17"]
CH000003671	glutamate metabolism	1	16	2.0791	0.893076	0.928329	["ENSG00000148672"]	["GLUD1"]
CH000003782	L-tryptophan ---> NAD+, NADPH	1	16	2.0791	0.893076	0.928329	["ENSG00000105835"]	["NAMPT"]
CH000003783	biosynthesis and degradation of nicotinamide,NAD+,NADP+	1	16	2.0791	0.893076	0.928329	["ENSG00000105835"]	["NAMPT"]
CH000004316	catabolism of PAF	1	16	2.0791	0.893076	0.928329	["ENSG00000168092"]	["PAFAH1B2"]
CH000004391	mGluR1---> PLCbeta1 ---> IP3R:IP3	1	16	2.0791	0.893076	0.928329	["ENSG00000156052"]	["GNAQ"]
CH000004476	IL-17 ---> TRAF6	1	16	2.0791	0.893076	0.928329	["ENSG00000177889"]	["UBE2N"]
CH000004493	IFNalpha ---> ISGF3	1	16	2.0791	0.893076	0.928329	["ENSG00000115415"]	["STAT1"]
CH000000643	PDGF B ---> DAG, IP3	1	17	2.20904	0.907075	0.937399	["ENSG00000163558"]	["PRKCI"]
CH000000644	PDGF A ---> DAG, IP3	1	17	2.20904	0.907075	0.937399	["ENSG00000163558"]	["PRKCI"]
CH000000698	IL-1beta ---> c-Jun	1	17	2.20904	0.907075	0.937399	["ENSG00000177606"]	["JUN"]
CH000004519	TLR9 ---IRAK1---> MKK3, MKK4	1	17	2.20904	0.907075	0.937399	["ENSG00000177889"]	["UBE2N"]
CH000000794	neurotensin pathway	3	41	5.32768	0.917621	0.943124	["ENSG00000069956","ENSG00000100030","ENSG00000156052"]	["GNAQ","MAPK1","MAPK6"]
CH000003780	acidic hexose derivatives and inositol	1	18	2.33898	0.919248	0.943124	["ENSG00000169764"]	["UGP2"]
CH000004164	EGF ---> HMGCR	1	18	2.33898	0.919248	0.943124	["ENSG00000113161"]	["HMGCR"]
CH000004320	biosynthesis of membrane phospholipids from alkyl-DHAP	1	18	2.33898	0.919248	0.943124	["ENSG00000155189"]	["AGPAT5 (ENSG00000155189)"]
CH000004504	IFNalpha ---CD45---> STAT	1	18	2.33898	0.919248	0.943124	["ENSG00000115415"]	["STAT1"]
CH000000789	IL-8 ---> ERK2	1	19	2.46893	0.929831	0.952608	["ENSG00000100030"]	["MAPK1"]
CH000000577	fMLP ---> superoxide	2	32	4.15819	0.93421	0.952974	["ENSG00000069956","ENSG00000100030"]	["MAPK1","MAPK6"]
CH000003848	metabolism of eicosanoids	2	32	4.15819	0.93421	0.952974	["ENSG00000110958","ENSG00000111144"]	["LTA4H","PTGES3"]
CH000004517	TLR9 pathway	2	32	4.15819	0.93421	0.952974	["ENSG00000177606","ENSG00000177889"]	["JUN","UBE2N"]
CH000000699	IL-1beta ---> Elk-1	1	20	2.59887	0.939031	0.95652	["ENSG00000177889"]	["UBE2N"]
CH000003734	L-serine, palmityl-CoA ---> sphingosine	1	22	2.85876	0.953981	0.964837	["ENSG00000119537"]	["KDSR"]
CH000004188	NRG ---> Akt-1	1	22	2.85876	0.953981	0.964837	["ENSG00000115904"]	["SOS1"]
CH000004334	interconversions of phosphatidylinositdes	1	22	2.85876	0.953981	0.964837	["ENSG00000276293"]	["PIP4K2B (ENSG00000276293)"]
CH000004373	de novo biosynthesis of ceramide	1	22	2.85876	0.953981	0.964837	["ENSG00000119537"]	["KDSR"]
CH000004392	mGluR receptor signaling	1	22	2.85876	0.953981	0.964837	["ENSG00000156052"]	["GNAQ"]
CH000000786	IL_8 pathway	3	49	6.36723	0.963844	0.973427	["ENSG00000100030","ENSG00000100380","ENSG00000141367"]	["CLTC","MAPK1","ST13"]
CH000003735	sphingophospholipids metabolism	1	24	3.11864	0.965275	0.97349	["ENSG00000119537"]	["KDSR"]
CH000000741	Epo pathway	1	25	3.24859	0.969839	0.975326	["ENSG00000254087"]	["LYN"]
CH000003573	glycerol ---> triacylglycerol	1	25	3.24859	0.969839	0.975326	["ENSG00000155189"]	["AGPAT5 (ENSG00000155189)"]
CH000003770	interconversions and degradations of purine ribonucleotides	2	41	5.32768	0.977253	0.981394	["ENSG00000035687","ENSG00000163655"]	["ADSS2","GMPS"]
CH000003855	metabolism of inositol phosphates and release of Ca++ from intracellular stores	1	29	3.76836	0.982846	0.985619	["ENSG00000276293"]	["PIP4K2B (ENSG00000276293)"]
CH000000740	IFNalpha_beta pathway 1	1	35	4.54802	0.992659	0.993629	["ENSG00000115415"]	["STAT1"]
CH000003599	formation and degradation of triacylglycerols	1	36	4.67797	0.993629	0.993629	["ENSG00000155189"]	["AGPAT5 (ENSG00000155189)"]
